# Supplementary material for: Coupling the environmental impacts of reactive nitrogen losses and yield responses of staple crops in China
Source: Front Plant Sci. 2022 Aug 19;13:927935. doi: 10.3389/fpls.2022.927935 (PMC9450997; doi:10.3389/fpls.2022.927935)
Supplement: Supplementary file 2 [file Data_Sheet_1.xls]

## Sheet: Wheat AP
																				AP
Id	Crop type			Applicatio depth	Amendments	Driving factors						yield scaled emission (kg N /Mg grains)				Acidification scaled NH3 (acid eq. /Mg grains)				Effect size
		Fertilizer type	N rate			Temperature oC	precipitation mm/season	Clay content (g/kg)	pH	SOM (g/kg)	soil total N (g/kg)	CK	SD	Treat	SD	CK	SD	Treat	SD	Mean	SD
1	winter wheat	none	0	none	none	65.4	211.1	230	7.7	12.6	0.8	0.0175439	0.00285714	0.0175439	0.000909091	1.0307	0.167857	1.0307	0.0534091	0	0.001
1	winter wheat	OCF	100	surface	none	65.4	211.1	230	7.7	12.6	0.8	0.0175439	0.00285714	1.31176	0.0398214	1.0307	0.167857	77.0662	2.33951	1.294	0.0126846
1	winter wheat	OCF	100	subsurface	none	65.4	211.1	230	7.7	12.6	0.8	0.0175439	0.00285714	0.0257069	0.0016129	1.0307	0.167857	1.51028	0.0947581	0.008	0.00114018
1	winter wheat	OCF	200	surface	none	65.4	211.1	230	7.7	12.6	0.8	0.45614	0.0171429	2.20619	0.169841	26.7982	1.00714	129.613	9.97817	1.75	0.0540268
1	winter wheat	OCF	200	subsurface	none	65.4	211.1	230	7.7	12.6	0.8	0.0947368	0.0171429	0.0480427	0.00364865	5.56579	1.00714	2.82251	0.214358	0.047	0.00552268
1	winter wheat	urea	100	surface	none	62.6	258.9	230	7.7	12.6	0.8	0.0947368	0.0171429	0.28125	0.02	5.56579	1.00714	16.5234	1.175	0.186	0.0083006
1	winter wheat	urea	100	subsurface	none	62.6	258.9	230	7.7	12.6	0.8	0.101754	0.0171429	0.0685579	0.00439394	5.97807	1.00714	4.02778	0.258144	0.033	0.00552268
1	winter wheat	urea	200	surface	none	62.6	258.9	230	7.7	12.6	0.8	0.101754	0.00666667	0.560662	0.0338889	5.97807	0.391667	32.9389	1.99097	0.459	0.0109772
1	winter wheat	urea	200	subsurface	none	62.6	258.9	230	7.7	12.6	0.8	0.119298	0.00666667	0.0564784	0.00343434	7.00877	0.391667	3.31811	0.201768	0.063	0.00240832
3	winter wheat	none	0	subsurface	none	66.2	220.3	60	7.7	18.2	1.2	0.0129032	0.00338983	0.0129032	0.000677966	0.758065	0.199153	0.758065	0.0398305	0	0.001
3	winter wheat	urea	240	subsurface	none	66.2	220.3	60	7.7	18.2	1.2	0.0129032	0.00338983	3.03571	0.141667	0.758065	0.199153	178.348	8.32292	3.023	0.0449144
3	winter wheat	urea	150	subsurface	none	66.2	220.3	60	7.7	18.2	1.2	0.0129032	0.00338983	2.73438	0.112903	0.758065	0.199153	160.645	6.63306	2.721	0.0357463
3	winter wheat	urea	150	subsurface	inhibitor	66.2	220.3	60	7.7	18.2	1.2	0.0193548	0.00338983	1.37457	0.0808081	1.1371	0.199153	80.756	4.74747	1.356	0.025632
3	winter wheat	urea	150	surface	none	66.2	220.3	60	7.7	18.2	1.2	0.0193548	0.00338983	7.77096	0.306452	1.1371	0.199153	456.544	18.004	7.752	0.0967703
3	winter wheat	urea	150	subsurface	inhibitor	66.2	220.3	60	7.7	18.2	1.2	0.0193548	0.00338983	1.10471	0.0468889	1.1371	0.199153	64.9018	2.75472	1.086	0.014893
3	winter wheat	urea	120	subsurface	none	66.2	220.3	60	7.7	18.2	1.2	0.0193548	0.00338983	1.27273	0.0583333	1.1371	0.199153	74.7727	3.42708	1.254	0.0183657
15	winter wheat	none	0	surface	none	66.2	220.3	165	8.3	17	0.9	1.11111	0.0284404	1.11111	0.0275229	65.2778	1.67087	65.2778	1.61697	0	0.012522
15	winter wheat	none	0	surface	mulch	66.2	220.3	165	8.3	17	0.9	1.11111	0.0284404	1.72424	0.0351235	65.2778	1.67087	101.299	2.0635	0.613	0.0141739
15	winter wheat	none	0	surface	mulch	66.2	220.3	165	8.3	17	0.9	1.11111	0.0284404	1.4	0.0408333	65.2778	1.67087	82.25	2.39896	0.289	0.0157003
15	winter wheat	none	0	surface	mulch	74.8	264.9	165	8.3	17	0.9	1.11111	0.0284404	1.80968	0.0505405	65.2778	1.67087	106.319	2.96926	0.699	0.0183984
15	winter wheat	none	0	surface	mulch	74.8	264.9	165	8.3	17	0.9	1.11111	0.0284404	1.84244	0.0444186	65.2778	1.67087	108.244	2.60959	0.731	0.0164924
15	winter wheat	none	0	surface	mulch	74.8	264.9	165	8.3	17	0.9	1.11111	0.0284404	1.79063	0.0339053	65.2778	1.67087	105.199	1.99194	0.68	0.0139284
15	winter wheat	urea	180	surface	none	66.2	220.3	165	8.3	17	0.9	1.11111	0.0284404	1.50625	0.0430357	65.2778	1.67087	88.4922	2.52835	0.395	0.0162265
15	winter wheat	urea	180	surface	mulch	66.2	220.3	165	8.3	17	0.9	1.11111	0.0284404	1.1625	0.0409434	65.2778	1.67087	68.2969	2.40542	0.052	0.0157003
15	winter wheat	urea	180	surface	mulch	66.2	220.3	165	8.3	17	0.9	1.11111	0.0284404	0.893069	0.0281818	65.2778	1.67087	52.4678	1.65568	0.218	0.012522
15	winter wheat	urea	180	surface	mulch	74.8	264.9	165	8.3	17	0.9	1.11111	0.0284404	1.11852	0.0387179	65.2778	1.67087	65.713	2.27468	0.008	0.0151822
15	winter wheat	urea	180	surface	mulch	74.8	264.9	165	8.3	17	0.9	1.11111	0.0284404	1.17593	0.0557018	65.2778	1.67087	69.0856	3.27248	0.065	0.019799
15	winter wheat	urea	180	surface	mulch	74.8	264.9	165	8.3	17	0.9	1.11111	0.0284404	1.13838	0.0518487	65.2778	1.67087	66.8796	3.04611	0.027	0.0186762
61	winter wheat	none	0	none	none	67.9	187.1	165	8.5	13	0.9	1.17885	0.0555172	1.17885	0.037375	69.2576	3.26164	69.2576	2.19578	0	0.021225
61	winter wheat	urea	90	surface	none	67.9	187.1	165	8.5	13	0.9	1.17885	0.0555172	1.85299	0.0988261	69.2576	3.26164	108.863	5.80603	0.674	0.035968
61	winter wheat	urea	180	surface	none	67.9	187.1	165	8.5	13	0.9	1.17885	0.0555172	1.32645	0.131746	69.2576	3.26164	77.929	7.74006	0.147	0.0453431
63	wheat	none	0	none	none	69	190.8	165	8.3	17.8	1.3	0.313846	0.0257143	0.313846	0.0291429	18.4385	1.51071	18.4385	1.71214	0	0.0123167
63	wheat	urea	90	surface	none	69	190.8	165	8.3	17.8	1.3	0.313846	0.0257143	1.05833	0.0742462	18.4385	1.51071	62.1771	4.36196	0.744	0.0248032
63	wheat	urea	90	surface	biochar	69	190.8	165	8.3	17.8	1.3	0.313846	0.0257143	1.04043	0.104542	18.4385	1.51071	61.1253	6.14182	0.726	0.0342067
63	wheat	urea	90	surface	biochar	69	190.8	165	8.3	17.8	1.3	0.313846	0.0257143	0.949485	0.0807895	18.4385	1.51071	55.7822	4.74638	0.635	0.0269017
64	wheat	none	0	none	none	66.2	220.3	165	8.3	13	0.9	0.979021	0.09	0.979021	0.14	57.5175	5.2875	57.5175	8.225	0	0.0526308
64	wheat	urea	180	subsurface	none	66.2	220.3	165	8.3	13	0.9	0.979021	0.09	1.11756	0.159105	57.5175	5.2875	65.6567	9.34743	0.139	0.0577763
64	wheat	none	0	none	none	74.8	264.9	165	8.3	13	0.9	0.979021	0.09	0.979021	0.0717949	57.5175	5.2875	57.5175	4.21795	0	0.0364472
64	wheat	urea	180	subsurface	none	74.8	264.9	165	8.3	13	0.9	0.979021	0.09	0.984549	0.103109	57.5175	5.2875	57.8422	6.05766	0.006	0.0432539
64	wheat	none	0	none	mulch	66.2	220.3	165	8.3	13	0.9	0.728125	0.05	0.728125	0.0970833	42.7773	2.9375	42.7773	5.70365	0	0.0345094
64	wheat	urea	180	subsurface	mulch	66.2	220.3	165	8.3	13	0.9	0.728125	0.05	0.989744	0.0981356	42.7773	2.9375	58.1474	5.76547	0.262	0.0347908
64	wheat	none	0	none	mulch	74.8	264.9	165	8.3	13	0.9	0.681287	0.0363636	0.681287	0.0706061	40.0256	2.13636	40.0256	4.14811	0	0.0251734
64	wheat	urea	180	subsurface	mulch	74.8	264.9	165	8.3	13	0.9	0.681287	0.0363636	0.972437	0.0850882	40.0256	2.13636	57.1307	4.99893	0.291	0.0291908
67	winter wheat	none	0	none	none	63.7	218.2	165	8	14.6	1.2	0.508475	0.0333333	0.508475	0.0416667	29.8729	1.95833	29.8729	2.44792	0	0.0168908
67	winter wheat	urea	180	surface	none	63.7	218.2	165	8	14.6	1.2	0.508475	0.111111	0.763766	0.0623188	29.8729	6.52778	44.8712	3.66123	0.256	0.0402057
67	winter wheat	urea	180	surface	none	63.7	218.2	165	8	14.6	1.2	0.508475	0.0277778	0.322581	0.024359	29.8729	1.63194	18.9516	1.43109	0.185	0.0116619
67	winter wheat	urea	240	surface	none	63.7	218.2	165	8	14.6	1.2	0.508475	0.0833333	0.352941	0.0615385	29.8729	4.89583	20.7353	3.61538	0.155	0.0327613
68	winter wheat	none	0	none	none	65.9	180.7	165	8	14.6	1.2	0.416129	0.115385	0.416129	0.0496154	24.4476	6.77885	24.4476	2.9149	0	0.0396548
68	winter wheat	urea	180	surface	none	65.9	180.7	165	8	14.6	1.2	0.416129	0.0192308	0.83274	0.0678261	24.4476	1.12981	48.9235	3.98478	0.417	0.0223271
68	winter wheat	urea	120	surface	none	65.9	180.7	165	8	14.6	1.2	0.416129	0.0769231	0.318618	0.0244118	24.4476	4.51923	18.7188	1.43419	0.097	0.0255049
68	winter wheat	urea	180	surface	none	65.9	180.7	165	8	14.6	1.2	0.416129	0.115385	0.398524	0.0385714	24.4476	6.77885	23.4133	2.26607	0.017	0.0384005
68	winter wheat	urea	240	surface	none	65.9	180.7	165	8	14.6	1.2	0.416129	0.0769231	0.5117	0.0489552	24.4476	4.51923	30.0624	2.87612	0.096	0.0288617
86	winter wheat	none	0	none	none	39.8	91.7	528	8.2	17.4	0.9	0.924084	0.0434343	0.924084	0.0356566	54.2899	2.55177	54.2899	2.09482	0	0.0177341
86	winter wheat	urea	104	subsurface	none	39.8	91.7	528	8.2	17.4	0.9	0.924084	0.0434343	1.34402	0.0395597	54.2899	2.55177	78.961	2.32414	0.42	0.0185715
86	winter wheat	urea	173	subsurface	none	39.8	91.7	528	8.2	17.4	0.9	0.924084	0.0434343	1.64207	0.0717742	54.2899	2.55177	96.4714	4.21673	0.718	0.0265198
86	winter wheat	urea	242	subsurface	none	39.8	91.7	528	8.2	17.4	0.9	0.924084	0.0434343	1.91987	0.0950794	54.2899	2.55177	112.792	5.58591	0.996	0.0329757
88	wheat	none	0	none	none	39.8	91.7	528	8.2	17.4	0.9	0.0544944	0.00368098	0.0544944	0.00119018	3.20154	0.216258	3.20154	0.0699233	0	0.00130384
88	wheat	urea	241.5	subsurface	none	39.8	91.7	528	8.2	17.4	0.9	0.0544944	0.00368098	1.71373	0.0624286	3.20154	0.216258	100.681	3.66768	1.66	0.0196469
88	wheat	urea	151.8	subsurface	none	39.8	91.7	528	8.2	17.4	0.9	0.0544944	0.00368098	1.76673	0.0488889	3.20154	0.216258	103.795	2.87222	1.713	0.0155467
88	wheat	urea	84.9	subsurface	none	39.8	91.7	528	8.2	17.4	0.9	0.0544944	0.00368098	4.79461	0.120542	3.20154	0.216258	281.683	7.08186	4.741	0.0382845
88	wheat	urea	216.7	subsurface	none	39.8	91.7	528	8.2	17.4	0.9	0.0544944	0.00368098	3.62057	0.12776	3.20154	0.216258	212.708	7.50593	3.567	0.0404969
10	winter wheat	none	0	none	none	63.4	88.1	202	8.2	11.4	0.7	0.125	0.025	0.125	0.0125	7.34375	1.46875	7.34375	0.734375	0	0.00891067
10	winter wheat	urea	150	subsurface	none	63.4	88.1	202	8.2	11.4	0.7	0.125	0.025	0.762887	0.0389474	7.34375	1.46875	44.8196	2.28816	0.638	0.0146492
10	winter wheat	UOA	420	subsurface	none	63.4	88.1	202	8.2	11.4	0.7	0.125	0.025	0.954198	0.049505	7.34375	1.46875	56.0592	2.90842	0.829	0.0176777
10	winter wheat	UOA	560	subsurface	none	63.4	88.1	202	8.2	11.4	0.7	0.125	0.025	1.40021	0.0711712	7.34375	1.46875	82.2625	4.18131	1.275	0.0238034
10	winter wheat	none	0	none	none	68.4	127.6	202	8.2	11.4	0.7	0.125	0.025	0.125	0.00606061	7.34375	1.46875	7.34375	0.356061	0	0.00813019
10	winter wheat	urea	150	subsurface	none	68.4	127.6	202	8.2	11.4	0.7	0.125	0.025	0.752033	0.0698113	7.34375	1.46875	44.1819	4.10142	0.627	0.0235053
10	winter wheat	UOA	420	subsurface	none	68.4	127.6	202	8.2	11.4	0.7	0.125	0.025	0.992218	0.0809524	7.34375	1.46875	58.2928	4.75595	0.867	0.0268067
10	winter wheat	UOA	560	subsurface	none	68.4	127.6	202	8.2	11.4	0.7	0.125	0.025	1.23924	0.15	7.34375	1.46875	72.8055	8.8125	1.114	0.0480885
11	winter wheat	none	0	none	none	88.7	394.9	192	8	10.3	0.8	2.56627	0.096875	2.56627	0.129091	150.768	5.69141	150.768	7.58409	0	0.0510392
11	winter wheat	urea	247.6	subsurface	none	88.7	394.9	192	8	10.3	0.8	2.56627	0.096875	10.914	0.761067	150.768	5.69141	641.195	44.7127	8.348	0.242596
11	winter wheat	urea	203.4	subsurface	none	88.7	394.9	192	8	10.3	0.8	2.56627	0.096875	8.46657	0.547179	150.768	5.69141	497.411	32.1468	5.901	0.175675
11	winter wheat	urea	185.1	subsurface	none	88.7	394.9	192	8	10.3	0.8	2.56627	0.096875	7.5732	0.644386	150.768	5.69141	444.925	37.8577	5.007	0.205948
11	winter wheat	urea	171	subsurface	none	88.7	394.9	192	8	10.3	0.8	2.56627	0.096875	6.946	0.361348	150.768	5.69141	408.078	21.2292	4.38	0.118207
11	winter wheat	urea	159.2	subsurface	none	88.7	394.9	192	8	10.3	0.8	2.56627	0.096875	6.27716	0.31809	150.768	5.69141	368.783	18.6878	3.711	0.105135
11	winter wheat	urea	148.8	subsurface	none	88.7	394.9	192	8	10.3	0.8	2.56627	0.096875	6.23	0.259583	150.768	5.69141	366.013	15.2505	3.664	0.0877548
11	winter wheat	urea	139.4	subsurface	none	88.7	394.9	192	8	10.3	0.8	2.56627	0.096875	5.4625	0.200459	150.768	5.69141	320.922	11.7769	2.897	0.0702915
12	winter wheat	none	0	none	none	74.2	229.8	170	7.8	26.7	1.4	0.821192	0.028125	0.821192	0.0223423	48.245	1.65234	48.245	1.31261	0	0.0112606
12	winter wheat	urea	60	surface	none	74.2	229.8	170	7.8	26.7	1.4	0.821192	0.028125	1.16164	0.0344715	48.245	1.65234	68.2466	2.0252	0.341	0.0139284
12	winter wheat	urea	120	surface	none	74.2	229.8	170	7.8	26.7	1.4	0.821192	0.028125	2.33647	0.0640645	48.245	1.65234	137.268	3.76379	1.515	0.0220907
13	winter wheat	none	0	none	none	58.2	145	170	7.9	26.7	1.4	0.587097	0.00676692	0.587097	0.0136842	34.4919	0.397556	34.4919	0.803947	0	0.00494975
13	winter wheat	urea	120	surface	none	58.2	145	170	7.9	26.7	1.4	0.587097	0.00676692	0.677201	0.0193548	34.4919	0.397556	39.7856	1.1371	0.09	0.00640312
13	winter wheat	urea	240	surface	none	58.2	145	170	7.9	26.7	1.4	0.587097	0.00676692	1.62426	0.062069	34.4919	0.397556	95.425	3.64655	1.037	0.0197307
13	winter wheat	urea	360	surface	none	58.2	145	170	7.9	26.7	1.4	0.587097	0.00676692	5.71429	0.209877	34.4919	0.397556	335.714	12.3302	5.127	0.0664447
12	winter wheat	urea	180	surface	none	74.2	229.8	170	7.8	26.7	1.4	0.821192	0.028125	5.97308	0.178086	48.245	1.65234	350.919	10.4626	5.152	0.0569807
101	winter wheat	noen	0	none	none	44.9	85.8	355	8.3	12.1	0.9	0.396488	0.00650407	0.396488	0.00910569	23.2937	0.382114	23.2937	0.534959	0	0.00360555
101	winter wheat	urea	50	subsurface	none	44.9	85.8	355	8.3	12.1	0.9	0.396488	0.00650407	0.915891	0.0325758	23.2937	0.382114	53.8086	1.91383	0.52	0.0106677
101	winter wheat	urea	100	subsurface	none	44.9	85.8	355	8.3	12.1	0.9	0.396488	0.00650407	1.16758	0.037013	23.2937	0.382114	68.5954	2.17451	0.772	0.011908
101	winter wheat	urea	150	subsurface	none	44.9	85.8	355	8.3	12.1	0.9	0.396488	0.00650407	1.67829	0.0641379	23.2937	0.382114	98.5998	3.7681	1.282	0.0203593
101	winter wheat	urea	200	subsurface	none	44.9	85.8	355	8.3	12.1	0.9	0.396488	0.00650407	2.07425	0.0683544	23.2937	0.382114	121.862	4.01582	1.678	0.0216171
101	winter wheat	urea	250	subsurface	none	44.9	85.8	355	8.3	12.1	0.9	0.396488	0.00650407	2.51968	0.0708571	23.2937	0.382114	148.031	4.16286	2.124	0.022561
101	winter wheat	urea	300	subsurface	none	44.9	85.8	355	8.3	12.1	0.9	0.396488	0.00650407	3.31848	0.0829545	23.2937	0.382114	194.96	4.87358	2.922	0.0263401
101	winter wheat	urea	400	subsurface	none	44.9	85.8	355	8.3	12.1	0.9	0.396488	0.00650407	2.49382	0.0646707	23.2937	0.382114	146.512	3.7994	2.098	0.0206737
102	winter wheat	none	0	none	none	50.3	79.4	355	8.3	12.1	0.9	0.294915	0.032	0.294915	0.0348	17.3263	1.88	17.3263	2.0445	0	0.0149967
102	winter wheat	Urea	50	surface	none	50.3	79.4	355	8.3	12.1	0.9	0.294915	0.032	0.483117	0.0563636	17.3263	1.88	28.3831	3.31136	0.188	0.0203961
102	winter wheat	Urea	75	surface	none	50.3	79.4	355	8.3	12.1	0.9	0.294915	0.032	0.597619	0.0330263	17.3263	1.88	35.1101	1.9403	0.303	0.0145362
102	winter wheat	Urea	100	surface	none	50.3	79.4	355	8.3	12.1	0.9	0.294915	0.032	0.831197	0.0563768	17.3263	1.88	48.8328	3.31214	0.536	0.0203961
102	winter wheat	Urea	125	surface	none	50.3	79.4	355	8.3	12.1	0.9	0.294915	0.032	1.06135	0.0894828	17.3263	1.88	62.3543	5.25711	0.766	0.0299082
102	winter wheat	Urea	150	surface	none	50.3	79.4	355	8.3	12.1	0.9	0.294915	0.032	1.75294	0.114615	17.3263	1.88	102.985	6.73365	1.458	0.0377478
102	winter wheat	Urea	175	surface	none	50.3	79.4	355	8.3	12.1	0.9	0.294915	0.032	1.71402	0.0977895	17.3263	1.88	100.699	5.74513	1.419	0.0326006
102	winter wheat	Urea	200	surface	none	50.3	79.4	355	8.3	12.1	0.9	0.294915	0.032	2.48454	0.143168	17.3263	1.88	145.966	8.41114	2.19	0.046339
98	winter wheat	none	0	none	none	71.9	194.4	119	7.6	20.2	1.5	1.30287	0.0189394	1.30287	0.0319697	76.5437	1.11269	76.5437	1.87822	0	0.0117686
98	winter wheat	urea	180	surface	none	71.9	194.4	119	7.6	20.2	1.5	1.30287	0.0189394	7.13159	0.176524	76.5437	1.11269	418.981	10.3708	5.829	0.0562939
98	winter wheat	manure	90	surface	none	71.9	194.4	119	7.6	20.2	1.5	1.30287	0.0189394	6.34517	0.137098	76.5437	1.11269	372.779	8.05451	5.042	0.0437379
98	winter wheat	urea	180	subsurface	none	76.2	169.8	119	7.6	20.2	1.5	1.30287	0.0189394	2.66238	0.0669295	76.5437	1.11269	156.415	3.93211	1.359	0.0220227
98	winter wheat	manure	90	subsurface	none	76.2	169.8	119	7.6	20.2	1.5	1.30287	0.0189394	2.52423	0.0624299	76.5437	1.11269	148.299	3.66776	1.221	0.0205061
98	winter wheat	urea	180	surface	none	71.9	194.4	119	7.6	20.2	1.5	1.30287	0.0189394	9.10457	0.21414	76.5437	1.11269	534.894	12.5807	7.802	0.0679389
98	winter wheat	manure	90	surface	none	71.9	194.4	119	7.6	20.2	1.5	1.30287	0.0189394	8.11938	0.16895	76.5437	1.11269	477.013	9.9258	6.816	0.0537792
98	winter wheat	urea	180	subsurface	none	76.2	169.8	119	7.6	20.2	1.5	1.30287	0.0189394	2.99261	0.0693478	76.5437	1.11269	175.816	4.07418	1.69	0.0226318
98	winter wheat	manure	90	subsurface	none	76.2	169.8	119	7.6	20.2	1.5	1.30287	0.0189394	3.03679	0.0625455	76.5437	1.11269	178.411	3.67455	1.734	0.0208087
98	winter wheat	urea	180	surface	none	71.9	194.4	119	7.6	20.2	1.5	1.30287	0.0189394	7.30212	0.214252	76.5437	1.11269	428.999	12.5873	5.999	0.0679389
98	winter wheat	manure	90	surface	none	71.9	194.4	119	7.6	20.2	1.5	1.30287	0.0189394	7.36633	0.23503	76.5437	1.11269	432.772	13.808	6.063	0.074556
98	winter wheat	urea	180	subsurface	none	76.2	169.8	119	7.6	20.2	1.5	1.30287	0.0189394	2.34818	0.120294	76.5437	1.11269	137.956	7.06728	1.045	0.03842
98	winter wheat	manure	90	subsurface	none	76.2	169.8	119	7.6	20.2	1.5	1.30287	0.0189394	2.55993	0.0935443	76.5437	1.11269	150.396	5.49573	1.257	0.0303266
98	winter wheat	urea	180	surface	none	71.9	194.4	119	7.6	20.2	1.5	1.30287	0.0189394	12.0025	0.286432	76.5437	1.11269	705.149	16.8279	10.7	0.0906405
98	winter wheat	manure	90	surface	none	71.9	194.4	119	7.6	20.2	1.5	1.30287	0.0189394	10.5039	0.270987	76.5437	1.11269	617.104	15.9205	9.201	0.0859081
98	winter wheat	urea	180	subsurface	none	76.2	169.8	119	7.6	20.2	1.5	1.30287	0.0189394	3.86679	0.105864	76.5437	1.11269	227.174	6.21952	2.564	0.0340544
98	winter wheat	manure	90	subsurface	none	76.2	169.8	119	7.6	20.2	1.5	1.30287	0.0189394	3.74079	0.0717062	76.5437	1.11269	219.771	4.21274	2.438	0.0235478
100	winter wheat	none	0	none	none	76.2	169.8	128	7.2	19.4	1.5	2.22353	0.0272	2.22353	0.05808	130.632	1.598	130.632	3.4122	0	0.0202312
100	winter wheat	urea	180	surface	none	76.2	169.8	128	7.2	19.4	1.5	2.22353	0.0272	7.97952	0.292414	130.632	1.598	468.797	17.1793	5.756	0.0927324
100	winter wheat	manure	180	subsurface	none	76.2	169.8	128	7.2	19.4	1.5	2.22353	0.0272	3.34794	0.13	130.632	1.598	196.691	7.6375	1.124	0.0419869
100	winter wheat	urea+manure	180	subsurface	none	76.2	169.8	128	7.2	19.4	1.5	2.22353	0.0272	5.17536	0.21763	130.632	1.598	304.052	12.7857	2.951	0.0694644
101	winter wheat	noen	0	none	none	76.2	169.8	128	7.2	19.4	1.5	0.396488	0.00645161	0.396488	0.00903226	23.2937	0.379032	23.2937	0.530645	0	0.00342053
101	winter wheat	urea	50	subsurface	none	76.2	169.8	128	7.2	19.4	1.5	0.396488	0.00645161	0.915891	0.0292517	23.2937	0.379032	53.8086	1.71854	0.52	0.00936483
101	winter wheat	urea	100	subsurface	none	76.2	169.8	128	7.2	19.4	1.5	0.396488	0.00645161	1.16758	0.0360759	23.2937	0.379032	68.5954	2.11946	0.772	0.0115412
101	winter wheat	urea	150	subsurface	none	76.2	169.8	128	7.2	19.4	1.5	0.396488	0.00645161	1.67829	0.0476923	23.2937	0.379032	98.5998	2.80192	1.282	0.0152971
101	winter wheat	urea	200	subsurface	none	76.2	169.8	128	7.2	19.4	1.5	0.396488	0.00645161	2.07425	0.0617143	23.2937	0.379032	121.862	3.62571	1.678	0.0196977
101	winter wheat	urea	250	subsurface	none	76.2	169.8	128	7.2	19.4	1.5	0.396488	0.00645161	2.51968	0.0712644	23.2937	0.379032	148.031	4.18678	2.124	0.0225322
101	winter wheat	urea	300	subsurface	none	76.2	169.8	128	7.2	19.4	1.5	0.396488	0.00645161	3.31848	0.0986486	23.2937	0.379032	194.96	5.79561	2.922	0.031364
101	winter wheat	urea	400	subsurface	none	76.2	169.8	128	7.2	19.4	1.5	0.396488	0.00645161	2.49382	0.0639053	23.2937	0.379032	146.512	3.75444	2.098	0.0203273
16	winter wheat	none	0	none	none	51.9	88.5	442	8	13.4	1.2	0.347682	0.00295858	0.347682	0.00621302	20.4263	0.173817	20.4263	0.365015	0	0.00212132
16	winter wheat	urea	270	subsurface	none	51.9	88.5	442	8	13.4	1.2	0.347682	0.00295858	9.79381	0.22179	20.4263	0.173817	575.387	13.0302	9.446	0.070209
16	winter wheat	urea	150	subsurface	none	51.9	88.5	442	8	13.4	1.2	0.347682	0.00295858	6.98295	0.158879	20.4263	0.173817	410.249	9.33411	6.635	0.0502892
16	winter wheat	urea	150	subsurface	inhibitor	51.9	88.5	442	8	13.4	1.2	0.347682	0.00295858	1.79283	0.0410959	20.4263	0.173817	105.329	2.41438	1.445	0.013
16	winter wheat	urea	150	subsurface	none	51.9	88.5	442	8	13.4	1.2	0.347682	0.00295858	6.30081	0.154229	20.4263	0.173817	370.173	9.06095	5.953	0.0487083
16	winter wheat	urea	150	subsurface	inhibitor	51.9	88.5	442	8	13.4	1.2	0.347682	0.00295858	0.980392	0.018797	20.4263	0.173817	57.598	1.10432	0.632	0.00608276
16	winter wheat	urea	120	subsurface	inhibitor	51.9	88.5	442	8	13.4	1.2	0.347682	0.00295858	0.40404	0.011236	20.4263	0.173817	23.7374	0.660112	0.056	0.00360555
92	winter wheat	none	0	none	none	51.9	88.5	442	8	13.4	1.2	0.110535	0.0008	0.110535	0.00256	6.49396	0.047	6.49396	0.1504	0	0.001
92	winter wheat	OCF	225	subsurface	none	51.9	88.5	442	8	13.4	1.2	0.110535	0.0008	0.513672	0.0193382	6.49396	0.047	30.1782	1.13612	0.403	0.00601664
92	winter wheat	UOA	225	subsurface	none	51.9	88.5	442	8	13.4	1.2	0.110535	0.0008	0.525217	0.0205442	6.49396	0.047	30.8565	1.20697	0.414	0.00664831
92	winter wheat	UOA	225	subsurface	none	51.9	88.5	442	8	13.4	1.2	0.110535	0.0008	0.772477	0.0266456	6.49396	0.047	45.383	1.56543	0.661	0.008544
96	wheat	none	0	none	none	57.1	74.4	245	8.2	5.6	0.2	0.442529	0.0179687	0.442529	0.0120312	25.9986	1.05566	25.9986	0.706836	0	0.00684105
96	wheat	OCF	180	surface	none	57.1	74.4	245	8.2	5.6	0.2	0.442529	0.0179687	0.431373	0.0119728	25.9986	1.05566	25.3431	0.703401	0.012	0.00684105
96	wheat	urea	180	surface	none	57.1	74.4	245	8.2	5.6	0.2	0.442529	0.0179687	1.67708	0.0407595	25.9986	1.05566	98.5286	2.39462	1.234	0.0141598
96	wheat	IU	180	surface	none	55.9	147.4	245	8.2	5.6	0.2	0.442529	0.0179687	1.1789	0.0315337	25.9986	1.05566	69.2603	1.85261	0.736	0.0116103
96	wheat	IU	180	surface	none	55.9	147.4	245	8.2	5.6	0.2	0.442529	0.0179687	1.18349	0.0339474	25.9986	1.05566	69.5298	1.99441	0.74	0.0121655
96	wheat	IU	180	surface	none	57.1	74.4	245	8.2	5.6	0.2	0.442529	0.0179687	0.901786	0.0191469	25.9986	1.05566	52.9799	1.12488	0.459	0.00827647
96	wheat	IU	180	surface	none	55.9	147.4	245	8.2	5.6	0.2	0.442529	0.0179687	0.557018	0.0109013	25.9986	1.05566	32.7248	0.640451	0.114	0.00667083
97	winter wheat	none	0	none	none	61	96.5	421	8.6	10.2	1	1.58514	0.0175	1.58514	0.02625	93.1273	1.02812	93.1273	1.54219	0	0.01
97	winter wheat	urea	75	subsurface	none	61	96.5	421	8.6	10.2	1	1.58514	0.0175	1.43571	0.023834	93.1273	1.02812	84.3482	1.40025	0.149	0.00948683
97	winter wheat	urea	150	subsurface	none	61	96.5	421	8.6	10.2	1	1.58514	0.0175	1.53814	0.028365	93.1273	1.02812	90.366	1.66644	0.047	0.0105262
97	winter wheat	urea	225	subsurface	none	61	96.5	421	8.6	10.2	1	1.58514	0.0175	1.74723	0.0389712	93.1273	1.02812	102.65	2.28956	0.162	0.0135831
97	winter wheat	urea	300	subsurface	none	61	96.5	421	8.6	10.2	1	1.58514	0.0175	2.23986	0.0619626	93.1273	1.02812	131.592	3.6403	0.655	0.0204157
103	winter wheat	none	0	none	none	51.9	88.5	275	8	10.6	1.1	1.6462	0.00127119	1.6462	0.0238559	96.7142	0.0746822	96.7142	1.40154	0	0.00759605
103	winter wheat	OCF	225	subsurface	none	51.9	88.5	275	8	10.6	1.1	1.6462	0.00127119	6.06786	0.127731	96.7142	0.0746822	356.487	7.5042	4.422	0.0404784
103	winter wheat	UOA	225	subsurface	none	51.9	88.5	275	8	10.6	1.1	1.6462	0.00127119	3.07965	0.0701613	96.7142	0.0746822	180.929	4.12198	1.434	0.0221382
103	winter wheat	UOA	225	subsurface	none	51.9	88.5	275	8	10.6	1.1	1.6462	0.00127119	2.33616	0.0531274	96.7142	0.0746822	137.25	3.12124	0.69	0.0167631
104	wheat	none	0	none	none	58.7	58.7	421	8.6	10.2	1	0.657321	0.0101695	0.657321	0.00857724	38.6176	0.597458	38.6176	0.503913	0	0.00425441
104	wheat	urea	135	surface	none	58.7	58.7	421	8.6	10.2	1	0.657321	0.0101695	1.84301	0.0337402	38.6176	0.597458	108.277	1.98223	1.186	0.0112071
104	wheat	urea	270	surface	none	58.7	58.7	421	8.6	10.2	1	0.657321	0.0101695	2.69929	0.0599605	38.6176	0.597458	158.583	3.52268	2.042	0.0192354
104	wheat	urea	405	surface	none	58.7	58.7	421	8.6	10.2	1	0.657321	0.0101695	3.6371	0.0850943	38.6176	0.597458	213.679	4.99929	2.98	0.0270647
104	wheat	urea	540	surface	none	58.7	58.7	421	8.6	10.2	1	0.657321	0.0101695	4.77937	0.11996	38.6176	0.597458	280.788	7.04766	4.122	0.0380789
105	Winter wheat	none	0	none	none	60.9	229.7	315	8.6	8.9	0.8	2.41265	0.0209756	2.41265	0.0390732	141.743	1.23232	141.743	2.29555	0	0.0140071
105	Winter wheat	urea	300	surface	none	60.9	229.7	315	8.6	8.9	0.8	2.41265	0.0209756	3.91455	0.119234	141.743	1.23232	229.98	7.00502	1.502	0.0382126
105	Winter wheat	urea	210	surface	none	60.9	229.7	315	8.6	8.9	0.8	2.41265	0.0209756	2.98324	0.0885782	141.743	1.23232	175.265	5.20397	0.57	0.0289171
105	Winter wheat	urea	210	surface	none	60.9	229.7	315	8.6	8.9	0.8	2.41265	0.0209756	2.40006	0.0662232	141.743	1.23232	141.004	3.89061	0.013	0.0219021
120	Winter wheat	none	0	none	none	60.9	219	22.3	13.17	8.54	0.8	3.38293	0.0259259	1.86061	0.0839259	198.747	1.52315	109.311	4.93065	1.522	0.0278065
120	Winter wheat	urea	315	surface	none	60.9	219	22.3	13.17	8.54	0.8	3.38293	0.0259259	6.80855	0.255926	198.747	1.52315	400.002	15.0356	3.426	0.0813708
120	Winter wheat	urea	270	surface	none	60.9	219	22.3	13.17	8.54	0.8	3.20638	0.0259259	5.68431	0.205169	188.375	1.52315	333.953	12.0537	2.478	0.065346
120	Winter wheat	urea	270	surface	none	60.9	219	22.3	13.17	8.54	0.8	3.55522	0.0259259	5.72977	0.214194	208.869	1.52315	336.624	12.5839	2.175	0.0681704
120	Winter wheat	urea	270	surface	none	60.9	219	22.3	13.17	8.54	0.8	3.31003	0.0259259	5.72829	0.204885	194.465	1.52315	336.537	12.037	2.418	0.065346
120	Winter wheat	urea	270	surface	none	60.9	219	22.3	13.17	8.54	0.8	3.40547	0.0259259	3.7113	0.141195	200.071	1.52315	218.039	8.2952	0.306	0.0453398
120	Winter wheat	urea	270	subsurface	none	60.9	219	22.3	13.17	8.54	0.8	3.82986	0.0259259	4.72784	0.16513	225.005	1.52315	277.76	9.70138	0.898	0.0528214
120	Winter wheat	urea	270	subsurface	none	60.9	219	22.3	13.17	8.54	0.8	3.7922	0.0259259	4.20272	0.140926	222.792	1.52315	246.91	8.2794	0.411	0.0453398
124	winter wheat	none	0	none	none	58.7	320	23.3	9.24	5.8	1.1	0.337704	0.0104478	0.337704	0.0126866	19.8401	0.613806	19.8401	0.745336	0	0.00518652
124	winter wheat	urea + manure	183.7	surface	none	58.7	320	23.3	9.24	5.8	1.1	0.337704	0.0104478	0.925705	0.0275197	19.8401	0.613806	54.3852	1.61678	0.588	0.00940213
124	winter wheat	urea + manure	183.7	surface	none	58.7	320	23.3	9.24	5.8	1.1	0.337704	0.0104478	0.869303	0.0341706	19.8401	0.613806	51.0716	2.00752	0.531	0.0112071
124	winter wheat	urea + manure	183.7	surface	none	58.7	320	23.3	9.24	5.8	1.1	0.337704	0.0104478	0.779963	0.0320188	19.8401	0.613806	45.8228	1.8811	0.442	0.0106019
22	wheat	none	0	none	none	87.7	195.9	595	7.6	13.6	1.1	0.984127	0.019084	0.984127	0.0236641	57.8175	1.12118	57.8175	1.39027	0	0.00967988
22	wheat	urea	300	subsurface	none	87.7	195.9	595	7.6	13.6	1.1	0.984127	0.019084	3.85714	0.0918672	57.8175	1.12118	226.607	5.3972	2.873	0.0297069
22	wheat	urea	300	subsurface	none	87.7	195.9	595	7.6	13.6	1.1	0.984127	0.019084	1.26689	0.0298805	57.8175	1.12118	74.4299	1.75548	0.283	0.0112294
22	wheat	urea	300	subsurface	none	87.7	195.9	595	7.6	13.6	1.1	0.984127	0.019084	1.91034	0.0517757	57.8175	1.12118	112.233	3.04182	0.926	0.0175071
22	wheat	UOA	300	subsurface	none	87.7	195.9	595	7.6	13.6	1.1	0.984127	0.019084	3.05498	0.130735	57.8175	1.12118	179.48	7.6807	2.071	0.0418593
117	Winter wheat-rice	none	0	none	none	104.5	373.6	223	7	13.25	1.9	0.496387	0.32	0.496387	0.316	29.1627	18.8	29.1627	18.565	0	0.142217
117	Winter wheat-rice	OCF	180	subsurface	none	104.5	373.6	223	7	13.25	1.9	0.496387	0.32	6.29874	2.625	29.1627	18.8	370.051	154.219	5.803	0.836243
117	Winter wheat-rice	UOA	135	subsurface	none	104.5	373.6	223	7	13.25	1.9	0.496387	0.32	5.89428	2.09542	29.1627	18.8	346.289	123.106	5.398	0.670181
117	Winter wheat-rice	UOA	90	subsurface	none	104.5	373.6	223	7	13.25	1.9	0.496387	0.32	4.79702	1.98727	29.1627	18.8	281.825	116.752	4.301	0.636441
117	Winter wheat-rice	OA	180	subsurface	none	104.5	373.6	223	7	13.25	1.9	0.496387	0.32	5.25378	2.05217	29.1627	18.8	308.66	120.565	4.758	0.656742
117	Winter wheat-rice	OA	270	subsurface	none	104.5	373.6	223	7	13.25	1.9	0.496387	0.32	7.6293	3.07773	29.1627	18.8	448.221	180.816	7.133	0.978595
117	Winter wheat-rice	OA	360	subsurface	none	104.5	373.6	223	7	13.25	1.9	0.496387	0.32	10.2271	3.36077	29.1627	18.8	600.84	197.445	9.731	1.06765
118	winter wheat	OCF	130	subsurface	none	105.7	339.3	284	7.8	11.23	0.7	0.402597	0.0521739	2	0.373077	23.6526	3.06522	117.5	21.9183	1.597	0.119094
118	winter wheat	Urea	130	subsurface	none	101.5	198.2	284	7.8	11.23	0.7	0.402597	0.0521739	2.27092	0.2	23.6526	3.06522	133.416	11.75	1.868	0.0653483
24	wheat	none	0	none	none	84.1	250.4	205	5.7	25.2	2.5	0.934375	0.00806452	0.934375	0.0482258	54.8945	0.47379	54.8945	2.83327	0	0.0153883
24	wheat	urea	250	surface	none	84.1	250.4	205	5.7	25.2	2.5	0.934375	0.00806452	3.90404	0.277358	54.8945	0.47379	229.362	16.2948	2.97	0.0876316
24	wheat	UOA	250	surface	mulch	84.1	250.4	205	5.7	25.2	2.5	0.934375	0.00806452	5.62568	0.383106	54.8945	0.47379	330.509	22.5075	4.692	0.121142
24	wheat	UOA	250	surface	mulch	84.1	250.4	205	5.7	25.2	2.5	0.934375	0.00806452	6.47296	0.385714	54.8945	0.47379	380.286	22.6607	5.539	0.12209
25	winter wheat	none	0	none	none	79.8	371	275	6.3	9.9	0.7	0.0338983	0.00163934	0.0338983	0.00163934	1.99153	0.0963115	1.99153	0.0963115	0	0.000894427
25	winter wheat	UOA	100	surface	mulch	79.8	371	275	6.3	9.9	0.7	0.0338983	0.00163934	2	0.0993548	1.99153	0.0963115	117.5	5.8371	1.966	0.0313129
25	winter wheat	UOA	200	surface	mulch	79.8	371	275	6.3	9.9	0.7	0.0338983	0.00163934	2.3704	0.147586	1.99153	0.0963115	139.261	8.67069	2.336	0.046806
25	winter wheat	UOA	300	surface	mulch	79.8	371	275	6.3	9.9	0.7	0.0338983	0.00163934	2.81933	0.216176	1.99153	0.0963115	165.636	12.7004	2.785	0.0683081
25	winter wheat	urea	200	surface	none	79.8	371	275	6.3	9.9	0.7	0.0338983	0.00163934	2.75461	0.213534	1.99153	0.0963115	161.833	12.5451	2.721	0.0676757
25	winter wheat	none	0	none	none	89.7	473.3	275	6.3	9.9	0.7	0.196721	0.00322581	0.196721	0.00967742	11.5574	0.189516	11.5574	0.568548	0	0.00330151
25	winter wheat	UOA	100	subsurface	mulch	89.7	473.3	275	6.3	9.9	0.7	0.196721	0.00322581	0.519802	0.0295775	11.5574	0.189516	30.5384	1.73768	0.323	0.00953415
25	winter wheat	UOA	200	subsurface	mulch	89.7	473.3	275	6.3	9.9	0.7	0.196721	0.00322581	0.807071	0.0552632	11.5574	0.189516	47.4154	3.24671	0.61	0.0174184
25	winter wheat	UOA	300	subsurface	mulch	89.7	473.3	275	6.3	9.9	0.7	0.196721	0.00322581	1.04673	0.0691358	11.5574	0.189516	61.4953	4.06173	0.85	0.0218403
25	winter wheat	urea	200	subsurface	mulch	89.7	473.3	275	6.3	9.9	0.7	0.196721	0.00322581	0.783956	0.068254	11.5574	0.189516	46.0574	4.00992	0.587	0.0215244
28	wheat	none	0	none	none	96.2	384.3	268	5.6	34.9	1.8	0.44918	0.055	0.44918	0.03425	26.3893	3.23125	26.3893	2.01219	0	0.0204475
28	wheat	urea	150	subsurface	none	96.2	384.3	268	5.6	34.9	1.8	0.44918	0.055	1.71146	0.139649	26.3893	3.23125	100.548	8.20439	1.262	0.0475657
28	wheat	urea	125	subsurface	none	96.2	384.3	268	5.6	34.9	1.8	0.44918	0.055	1.64197	0.117311	26.3893	3.23125	96.4655	6.89202	1.193	0.0408828
28	wheat	urea	125	subsurface	biochar	96.2	384.3	268	5.6	34.9	1.8	0.44918	0.055	2.04515	0.14	26.3893	3.23125	120.153	8.225	1.596	0.0475657
28	wheat	urea	125	subsurface	biochar	96.2	384.3	268	5.6	34.9	1.8	0.44918	0.055	2.62581	0.173926	26.3893	3.23125	154.266	10.2181	2.177	0.057707
28	wheat	urea	125	subsurface	inhibitor	96.2	384.3	268	5.6	34.9	1.8	0.44918	0.055	0.922382	0.0604225	26.3893	3.23125	54.19	3.54982	0.473	0.0257391
28	wheat	urea	125	subsurface	biochar	96.2	384.3	268	5.6	34.9	1.8	0.44918	0.055	1.36152	0.0668478	26.3893	3.23125	79.9895	3.92731	0.913	0.0274117
28	wheat	urea	125	subsurface	biochar	96.2	384.3	268	5.6	34.9	1.8	0.44918	0.055	1.69942	0.0869714	26.3893	3.23125	99.8409	5.10957	1.25	0.0325484
38	winter wheat	none	0	none	none	92	392.5	275	6.3	9.9	0.7	0.205734	0.0108108	0.205734	0.010991	12.0868	0.635135	12.0868	0.645721	0	0.00491935
38	winter wheat	urea	40	surface	mulch	92	392.5	275	6.3	9.9	0.7	0.205734	0.0108108	2.13225	0.0981935	12.0868	0.635135	125.27	5.76887	1.926	0.0311849
38	winter wheat	urea	80	surface	mulch	92	392.5	275	6.3	9.9	0.7	0.205734	0.0108108	2.65672	0.14731	12.0868	0.635135	156.082	8.65448	2.451	0.0466154
38	winter wheat	urea	120	surface	mulch	92	392.5	275	6.3	9.9	0.7	0.205734	0.0108108	3.20459	0.17816	12.0868	0.635135	188.27	10.4669	2.999	0.0563959
38	winter wheat	urea	80	surface	none	92	392.5	275	6.3	9.9	0.7	0.205734	0.0108108	3.65759	0.141709	12.0868	0.635135	214.883	8.32538	3.452	0.0450389
38	winter wheat	none	0	none	none	92	392.5	275	6.3	9.9	0.7	0.20678	0.00779221	0.20678	0.00792208	12.1483	0.457792	12.1483	0.465422	0	0.00357771
38	winter wheat	urea	40	subsurface	mulch	92	392.5	275	6.3	9.9	0.7	0.20678	0.00779221	0.534371	0.0220321	12.1483	0.457792	31.3943	1.29439	0.327	0.0074027
38	winter wheat	urea	80	subsurface	mulch	92	392.5	275	6.3	9.9	0.7	0.20678	0.00779221	0.980392	0.0412935	12.1483	0.457792	57.598	2.426	0.773	0.0132098
38	winter wheat	urea	120	subsurface	mulch	92	392.5	275	6.3	9.9	0.7	0.20678	0.00779221	1.15757	0.0553695	12.1483	0.457792	68.0072	3.25296	0.951	0.0175756
38	winter wheat	urea	80	subsurface	none	92	392.5	275	6.3	9.9	0.7	0.20678	0.00779221	1.065	0.0398131	12.1483	0.457792	62.5687	2.33902	0.858	0.0128996
40	wheat	none	0	none	none	99.3	843.3	268	7.3	5.7	1.5	0.703226	0.0306122	0.703226	0.0444898	41.3145	1.79847	41.3145	2.61378	0	0.0170206
40	wheat	urea	150	surface	biochar	99.3	843.3	268	7.3	5.7	1.5	0.703226	0.0306122	5.1444	0.434286	41.3145	1.79847	302.234	25.5143	4.441	0.137593
40	wheat	urea	150	surface	biochar	99.3	843.3	268	7.3	5.7	1.5	0.703226	0.0306122	5.063	0.285161	41.3145	1.79847	297.451	16.7532	4.36	0.0906565
40	wheat	urea	150	surface	biochar	99.3	843.3	268	7.3	5.7	1.5	0.703226	0.0306122	5.87669	0.393548	41.3145	1.79847	345.255	23.121	5.174	0.124979
43	winter wheat	none	0	none	none	84.6	331.7	100	5.8	21.4	1.2	0.288107	0.0125	0.288107	0.0179167	16.9263	0.734375	16.9263	1.0526	0	0.0070214
43	winter wheat	urea	240	subsurface	none	84.6	331.7	100	5.8	21.4	1.2	0.288107	0.0125	7.02106	0.57377	16.9263	0.734375	412.487	33.709	6.733	0.181561
43	winter wheat	urea	150	subsurface	none	84.6	331.7	100	5.8	21.4	1.2	0.288107	0.0125	5.17039	0.357724	16.9263	0.734375	303.76	21.0163	4.882	0.113284
43	winter wheat	urea	150	subsurface	inhibitor	84.6	331.7	100	5.8	21.4	1.2	0.288107	0.0125	2.06229	0.126452	16.9263	0.734375	121.16	7.42903	1.774	0.0400562
43	winter wheat	urea	150	subsurface	none	84.6	331.7	100	5.8	21.4	1.2	0.288107	0.0125	5.3464	0.338028	16.9263	0.734375	314.101	19.8592	5.058	0.106964
43	winter wheat	urea	150	subsurface	inhibitor	84.6	331.7	100	5.8	21.4	1.2	0.288107	0.0125	1.07504	0.075188	16.9263	0.734375	63.1585	4.41729	0.787	0.0240707
43	winter wheat	urea	120	subsurface	inhibitor	84.6	331.7	100	5.8	21.4	1.2	0.288107	0.0125	0.680851	0.0397516	16.9263	0.734375	40	2.3354	0.393	0.0133004
54	winter wheat (1998)	none	0	none	none	82.8	68.1	104	8.6	9.3	0.6	1.76774	0.0416	1.76774	0.08768	103.855	2.444	103.855	5.1512	0	0.030835
54	winter wheat (1998)	urea	120	surface	none	82.8	68.1	104	8.6	9.3	0.6	1.76774	0.0416	2.6106	0.166618	103.855	2.444	153.373	9.78879	0.843	0.0544546
54	winter wheat (1998)	urea	120	subsurface	none	82.8	68.1	104	8.6	9.3	0.6	1.76774	0.0416	1.663	0.100399	103.855	2.444	97.701	5.89844	0.105	0.0342987
54	winter wheat (1999)	urea	100	surface	none	82.8	68.1	104	8.6	9.3	0.6	1.76774	0.0416	2.62438	0.114054	103.855	2.444	154.182	6.70068	0.856	0.0384187
54	winter wheat (1999)	urea	100	subsurface	none	82.8	68.1	104	8.6	9.3	0.6	1.76774	0.0416	1.49268	0.0779618	103.855	2.444	87.6951	4.58025	0.275	0.0280143
53	wheat (2009)	none	0	none	none	83.3	147.7	137	8.3	10.2	0.6	0.516129	0.0268293	0.516129	0.0390244	30.3226	1.57622	30.3226	2.29268	0	0.015
53	wheat (2009)	urea	150	surface	none	83.3	147.7	137	8.3	10.2	0.6	0.516129	0.0268293	3.48013	0.209032	30.3226	1.57622	204.458	12.2806	2.964	0.0666408
53	wheat (2009)	urea	150	surface	none	83.3	147.7	137	8.3	10.2	0.6	0.516129	0.0268293	4.18392	0.237037	30.3226	1.57622	245.805	13.9259	3.668	0.0754308
53	wheat (2009)	urea	150	subsurface	none	83.3	147.7	137	8.3	10.2	0.6	0.516129	0.0268293	2.52472	0.137931	30.3226	1.57622	148.327	8.10345	2.009	0.0444668
53	wheat (2009)	urea	190	surface	none	83.3	147.7	137	8.3	10.2	0.6	0.516129	0.0268293	7.77267	0.467925	30.3226	1.57622	456.644	27.4906	7.257	0.148241
53	wheat (2009)	urea	190	surface	none	83.3	147.7	137	8.3	10.2	0.6	0.516129	0.0268293	4.09683	0.319355	30.3226	1.57622	240.689	18.7621	3.581	0.101237
53	wheat (2009)	urea	190	subsurface	none	83.3	147.7	137	8.3	10.2	0.6	0.516129	0.0268293	4.375	0.333333	30.3226	1.57622	257.031	19.5833	3.859	0.105649
53	wheat (2009)	urea	190	subsurface	none	83.3	147.7	137	8.3	10.2	0.6	0.516129	0.0268293	2.78788	0.215625	30.3226	1.57622	163.788	12.668	2.272	0.0688368
53	wheat (2009)	urea	230	surface	none	83.3	147.7	137	8.3	10.2	0.6	0.516129	0.0268293	4.52206	0.309434	30.3226	1.57622	265.671	18.1792	4.006	0.0980867
53	wheat (2009)	urea	230	surface	none	83.3	147.7	137	8.3	10.2	0.6	0.516129	0.0268293	6.55367	0.511765	30.3226	1.57622	385.028	30.0662	6.038	0.162134
53	wheat (2009)	urea	230	subsurface	none	83.3	147.7	137	8.3	10.2	0.6	0.516129	0.0268293	2.75598	0.210219	30.3226	1.57622	161.914	12.3504	2.24	0.0669545
53	wheat (2009)	urea	270	surface	none	83.3	147.7	137	8.3	10.2	0.6	0.516129	0.0268293	12.4444	0.768	30.3226	1.57622	731.111	45.12	11.928	0.243013
53	wheat (2009)	urea	270	surface	none	83.3	147.7	137	8.3	10.2	0.6	0.516129	0.0268293	4.63972	0.338462	30.3226	1.57622	272.583	19.8846	4.124	0.107225
53	wheat (2009)	urea	270	subsurface	none	83.3	147.7	137	8.3	10.2	0.6	0.516129	0.0268293	4.65937	0.347368	30.3226	1.57622	273.738	20.4079	4.143	0.110063
60	wheat	none	0	none	none	88.7	512.2	280	6.1	31.7	2.1	1.52749	0.0576	1.52749	0.14224	89.7401	3.384	89.7401	8.3566	0	0.0485057
60	wheat	UOCF	200	surface	none	88.7	512.2	280	6.1	31.7	2.1	1.52749	0.0576	4.31542	0.549265	89.7401	3.384	253.531	32.2693	2.788	0.174575
60	wheat	UOCF	200	subsurface	none	88.7	512.2	280	6.1	31.7	2.1	1.52749	0.0576	4.02064	0.376989	89.7401	3.384	236.213	22.1481	2.494	0.12062
60	wheat	IU	200	surface	none	88.7	512.2	280	6.1	31.7	2.1	1.52749	0.0576	2.86508	0.23507	89.7401	3.384	168.323	13.8103	1.338	0.0765435
60	wheat	IU	200	subsurface	none	88.7	512.2	280	6.1	31.7	2.1	1.52749	0.0576	3.08268	0.238874	89.7401	3.384	181.108	14.0339	1.556	0.0777721
60	wheat	IU	200	subsurface	none	88.7	512.2	280	6.1	31.7	2.1	1.52749	0.0576	2.90367	0.214872	89.7401	3.384	170.591	12.6237	1.377	0.0704195
60	wheat	OA	200	subsurface	none	88.7	512.2	280	6.1	31.7	2.1	1.52749	0.0576	3.81825	0.264647	89.7401	3.384	224.322	15.548	2.291	0.085784
143	wheat	none	0	none	none	119.5	623.04	266	27.8	6.05	1.81	0.0245184	0.00078125	0.0245184	0.000546875	1.44046	0.0458984	1.44046	0.0321289	0	0.000447214
143	wheat	urea	100	surface	none	119.5	623.04	266	27.8	6.05	1.81	0.0245184	0.00078125	0.179671	0.00514706	1.44046	0.0458984	10.5557	0.30239	0.155	0.00161245
143	wheat	urea	250	surface	none	119.5	623.04	266	27.8	6.05	1.81	0.0245184	0.00078125	0.290456	0.00915033	1.44046	0.0458984	17.0643	0.537582	0.265	0.00286356

## Sheet: Maize AP
																				AP
Id	Crop Type			Applicatio depth	Amendments	Driving factors						yield scaled emission (kg N /Mg grains)				Acidification scaled NH3 (acid eq. /Mg grains)				Effect size
		Fertilizer type	N rate			Temperature oC	precipitation mm/season	Clay content (g/kg)	pH	SOM (g/kg)	soil total N (g/kg)	CK	SD	Treat	SD	CK	SD	Treat	SD	mean	SD
1	summer maize	OCF	0	none	none	94.3	431.9	230	7.7	12.6	0.8	0.302326	0.005	0.302326	0.00915493	17.7616	0.29375	17.7616	0.537852	0	0.193797
1	summer maize	OCF	100	surface	none	94.3	431.9	230	7.7	12.6	0.8	0.302326	0.005	0.770968	0.0302532	17.7616	0.29375	45.2944	1.77737	27.5327	0.569679
1	summer mazie	OCF	100	subsurface	none	94.3	431.9	230	7.7	12.6	0.8	0.302326	0.005	0.884444	0.0368519	17.7616	0.29375	51.9611	2.16505	34.1995	0.690921
1	summer maize	OCF	200	surface	none	94.3	431.9	230	7.7	12.6	0.8	0.0627907	0.005	1.26241	0.0605442	3.68895	0.29375	74.1667	3.55697	70.4777	1.12864
1	summer maize	OCF	200	subsurface	none	94.3	431.9	230	7.7	12.6	0.8	0.0627907	0.005	1.41221	0.060989	3.68895	0.29375	82.9676	3.5831	79.2786	1.13688
1	summer maize	urea	100	surface	none	96.7	311.9	230	7.7	12.6	0.8	0.0674419	0.005	0.464646	0.0133721	3.96221	0.29375	27.298	0.78561	23.3358	0.265231
1	summer maize	urea	100	subsurface	none	96.7	311.9	230	7.7	12.6	0.8	0.0674419	0.005	0.262774	0.0079558	3.96221	0.29375	15.438	0.467403	11.4757	0.174572
1	summer maize	urea	200	surface	none	96.7	311.9	230	7.7	12.6	0.8	0.0790698	0.00384615	0.710067	0.0339103	4.64535	0.225962	41.7164	1.99223	37.0711	0.634037
1	summer maize	urea	200	subsurface	none	96.7	311.9	230	7.7	12.6	0.8	0.0790698	0.00384615	0.67439	0.02765	4.64535	0.225962	39.6204	1.62444	34.9751	0.518638
2	summer maize	none	0	none	none	92.3	331	230	7.9	12.2	1.2	1.60941	0.0763636	0.668235	0.0516364	94.5529	4.48636	39.2588	3.03364	55.2941	1.71261
2	summer maize	none	0	subsurface	none	94	353.9	230	7.9	12.2	1.2	1.60941	0.0763636	0.6	0.041129	94.5529	4.48636	35.25	2.41633	59.3029	1.6114
2	summer maize	urea	59	subsurface	none	92.3	331	230	7.9	12.2	1.2	1.60941	0.0763636	0.666667	0.0416	94.5529	4.48636	39.1667	2.444	55.3863	1.61557
2	summer maize	urea	59	surface	none	94	353.9	230	7.9	12.2	1.2	1.60941	0.0763636	1.41737	0.0787059	94.5529	4.48636	83.2707	4.62397	11.2823	2.03737
2	summer maize	urea	200	subsurface	none	92.3	331	230	7.9	12.2	1.2	1.60941	0.0763636	1.31327	0.0477612	94.5529	4.48636	77.1546	2.80597	17.3984	1.67335
2	summer maize	urea	200	surface	none	94	353.9	230	7.9	12.2	1.2	1.60941	0.0763636	4.92715	0.176303	94.5529	4.48636	289.47	10.3578	194.917	3.56948
2	summer maize	urea	200	subsurface	biochar	92.3	331	230	7.9	12.2	1.2	1.60941	0.0763636	1.43421	0.0558974	94.5529	4.48636	84.2599	3.28397	10.2931	1.75818
2	summer maize	urea	341	subsurface	none	94	353.9	230	7.9	12.2	1.2	1.60941	0.0763636	1.85366	0.0849162	94.5529	4.48636	108.902	4.98883	14.3495	2.12169
2	summer maize	urea	341	surface	none	92.3	331	230	7.9	12.2	1.2	1.60941	0.0763636	3.97647	0.180749	94.5529	4.48636	233.618	10.619	139.065	3.64541
2	summer maize	urea	400	surface	biochar	94	353.9	230	7.9	12.2	1.2	1.60941	0.0763636	2.00464	0.0919149	94.5529	4.48636	117.773	5.4	23.2197	2.22008
9	summer maize	none	0	subsurface	none	67.9	187.1	301	8	10.5	0.3	0.621891	0.0191176	0.621891	0.0367647	36.5361	1.12316	36.5361	2.15993	0	0.769855
9	summer maize	urea	220	subsurface	none	67.9	187.1	301	8	10.5	0.3	0.621891	0.0191176	11.75	0.430065	36.5361	1.12316	690.312	25.2663	653.776	7.99781
9	summer maize	urea	220	subsurface	inhibitor	67.9	187.1	301	8	10.5	0.3	0.621891	0.0191176	1.75883	0.113793	36.5361	1.12316	103.331	6.68534	66.795	2.14372
9	summer maize	urea	220	surface	inhibitor	67.9	187.1	301	8	10.5	0.3	0.621891	0.0191176	2.29167	0.194118	36.5361	1.12316	134.635	11.4044	98.0993	3.62384
9	summer maize	none	0	subsurface	none	67.9	187.1	301	8	10.5	0.3	0.625	0.0136842	0.625	0.0263158	36.7187	0.803947	36.7187	1.54605	0	0.551054
9	summer maize	urea	220	subsurface	none	67.9	187.1	301	8	10.5	0.3	0.625	0.0136842	7.23214	0.326613	36.7187	0.803947	424.888	19.1885	388.17	6.07326
9	summer maize	urea	220	subsurface	inhibitor	67.9	187.1	301	8	10.5	0.3	0.625	0.0136842	0.371795	0.0213235	36.7187	0.803947	21.8429	1.25276	14.8758	0.470716
9	summer maize	urea	220	surface	inhibitor	67.9	187.1	301	8	10.5	0.3	0.625	0.0136842	0.513514	0.0193878	36.7187	0.803947	30.1689	1.13903	6.54983	0.440877
9	summer maize	none	0	subsurface	none	67.9	187.1	301	8	10.5	0.3	0.418605	0.012381	0.418605	0.0171429	24.593	0.727381	24.593	1.00714	0	0.392864
9	summer maize	urea	220	subsurface	none	67.9	187.1	301	8	10.5	0.3	0.418605	0.012381	3.41256	0.128025	24.593	0.727381	200.488	7.5215	175.895	2.3896
9	summer maize	urea	220	subsurface	inhibitor	67.9	187.1	301	8	10.5	0.3	0.418605	0.012381	0.292683	0.0162162	24.593	0.727381	17.1951	0.952703	7.3979	0.379042
9	summer maize	urea	220	surface	inhibitor	67.9	187.1	301	8	10.5	0.3	0.418605	0.012381	0.344388	0.0183673	24.593	0.727381	20.2328	1.07908	4.36024	0.411522
4	summer maize	none	0	none	none	97.1	261.6	374	8.5	9.6	1.1	0.623684	0.0793103	0.623684	0.0817241	36.6414	4.65948	36.6414	4.80129	0	2.11573
4	summer maize	IU	60	subsurface	none	97.1	261.6	374	8.5	9.6	1.1	0.623684	0.0793103	0.61949	0.0386957	36.6414	4.65948	36.395	2.27337	0.246436	1.63948
4	summer maize	IU	60	subsurface	none	97.1	261.6	374	8.5	9.6	1.1	0.623684	0.0793103	0.813333	0.0494595	36.6414	4.65948	47.7833	2.90574	11.1419	1.73649
4	summer maize	IU	60	subsurface	none	97.1	261.6	374	8.5	9.6	1.1	0.623684	0.0793103	1.03175	0.0606667	36.6414	4.65948	60.6151	3.56417	23.9736	1.8551
4	summer maize	IU	60	subsurface	none	97.1	261.6	374	8.5	9.6	1.1	0.623684	0.0793103	1.33043	0.0755556	36.6414	4.65948	78.163	4.43889	41.5216	2.03506
62	spring maize	none	0	none	none	103.9	559.8	339	5.5	17.6	1.2	0.950725	0.0343284	0.950725	0.0489552	55.8551	2.01679	55.8551	2.87612	0	1.11083
62	spring maize	urea	250	subsurface	none	103.9	559.8	339	5.5	17.6	1.2	0.950725	0.0343284	2.73159	0.149351	55.8551	2.01679	160.481	8.77435	104.626	2.84705
62	spring maize	urea	200	subsurface	none	103.9	559.8	339	5.5	17.6	1.2	0.950725	0.0343284	2.01072	0.103448	55.8551	2.01679	118.13	6.07759	62.275	2.02496
62	spring maize	none	0	none	none	103.9	559.8	339	5.5	17.6	1.2	1.81159	0.0462687	1.81159	0.0625	106.431	2.71828	106.431	3.67188	0	1.44471
62	spring maize	urea	300	subsurface	none	103.9	559.8	339	5.5	17.6	1.2	1.81159	0.0462687	3.15789	0.11811	106.431	2.71828	185.526	6.93898	79.0952	2.35666
62	spring maize	urea	200	subsurface	none	103.9	559.8	339	5.5	17.6	1.2	1.81159	0.0462687	5.67465	0.225	106.431	2.71828	333.386	13.2188	226.955	4.2676
63	maize	none	0	none	none	99.3	359.4	165	8.3	17.8	1.3	0.609827	0.020339	0.609827	0.0357627	35.8273	1.19492	35.8273	2.10106	0	0.764348
63	maize	urea	90	surface	none	99.3	359.4	165	8.3	17.8	1.3	0.609827	0.020339	1.01495	0.0856885	35.8273	1.19492	59.6284	5.0342	23.8011	1.63618
63	maize	urea	90	surface	biochar	99.3	359.4	165	8.3	17.8	1.3	0.609827	0.020339	0.922071	0.0489279	35.8273	1.19492	54.1717	2.87452	18.3444	0.984412
63	maize	urea	90	surface	biochar	99.3	359.4	165	8.3	17.8	1.3	0.609827	0.020339	0.969752	0.0476992	35.8273	1.19492	56.9729	2.80233	21.1456	0.963372
65	summer maize	urea	0	none	none	90.9	481.1	230	7.9	12.2	1.2	1.31112	0.0507937	1.31112	0.0855556	77.0281	2.98413	77.0281	5.02639	0	1.8485
65	summer maize	urea	256.08	subsurface	none	90.9	481.1	230	7.9	12.2	1.2	1.31112	0.0507937	2.23294	0.0756872	77.0281	2.98413	131.185	4.44662	54.1572	1.69344
65	summer maize	urea	256.08	subsurface	none	90.9	481.1	230	7.9	12.2	1.2	1.31112	0.0507937	1.63428	0.0584762	77.0281	2.98413	96.0141	3.43548	18.986	1.43901
65	summer maize	urea	43.92	subsurface	none	90.9	481.1	230	7.9	12.2	1.2	1.31112	0.0507937	4.37553	0.276533	77.0281	2.98413	257.062	16.2463	180.034	5.22349
65	summer maize	urea	43.92	subsurface	none	90.9	481.1	230	7.9	12.2	1.2	1.31112	0.0507937	5.86026	0.439697	77.0281	2.98413	344.29	25.8322	267.262	8.22318
65	summer maize	urea	300	subsurface	none	90.9	481.1	230	7.9	12.2	1.2	1.31112	0.0507937	3.86929	0.164811	77.0281	2.98413	227.321	9.68264	150.293	3.20404
65	summer maize	none	0	none	none	90.9	481.1	230	7.9	12.2	1.2	1.69175	0.0553571	1.69175	0.124464	99.3902	3.25223	99.3902	7.31228	0	2.53074
65	summer maize	urea	150	subsurface	none	90.9	481.1	230	7.9	12.2	1.2	1.69175	0.0553571	6.02372	0.178432	99.3902	3.25223	353.894	10.4829	254.504	3.47085
65	summer maize	urea	150	subsurface	none	90.9	481.1	230	7.9	12.2	1.2	1.69175	0.0553571	2.57744	0.109172	99.3902	3.25223	151.425	6.41385	52.0346	2.27408
65	summer maize	urea	150	subsurface	none	90.9	481.1	230	7.9	12.2	1.2	1.69175	0.0553571	3.83022	0.169586	99.3902	3.25223	225.025	9.96319	125.635	3.31424
65	summer maize	urea	150	subsurface	none	90.9	481.1	230	7.9	12.2	1.2	1.69175	0.0553571	3.83022	0.15179	99.3902	3.25223	225.025	8.91767	125.635	3.0017
65	summer maize	urea	150	subsurface	none	90.9	481.1	230	7.9	12.2	1.2	1.69175	0.0553571	3.83022	0.15179	99.3902	3.25223	225.025	8.91767	125.635	3.0017
65	summer maize	urea	150	subsurface	none	90.9	481.1	230	7.9	12.2	1.2	1.69175	0.0553571	3.83022	0.14903	99.3902	3.25223	225.025	8.75553	125.635	2.95358
65	summer maize	urea	150	subsurface	none	90.9	481.1	230	7.9	12.2	1.2	1.69175	0.0553571	3.83022	0.15179	99.3902	3.25223	225.025	8.91767	125.635	3.0017
65	summer maize	none	0	none	none	90.9	481.1	230	7.9	12.2	1.2	1.69175	0.0553571	1.69175	0.101014	99.3902	3.25223	99.3902	5.9346	0	2.14001
65	summer maize	urea	300	subsurface	none	90.9	481.1	230	7.9	12.2	1.2	1.69175	0.0553571	5.92283	0.231872	99.3902	3.25223	347.966	13.6225	248.576	4.42888
66	summer maize	none	0	none	none	92.3	331	230	7.9	12.2	1.2	1.19436	0.0361905	1.19436	0.0455238	70.1687	2.12619	70.1687	2.67452	0	1.08045
66	summer maize	none	0	none	none	92.3	331	230	7.9	12.2	1.2	1.19436	0.0361905	1.87837	0.0635772	70.1687	2.12619	110.354	3.73516	40.1856	1.35912
66	summer maize	urea	59	surface	none	92.3	331	230	7.9	12.2	1.2	1.19436	0.0361905	2.44324	0.085	70.1687	2.12619	143.54	4.99375	73.3714	1.71634
66	summer maize	urea	59	subsurface	none	92.3	331	230	7.9	12.2	1.2	1.19436	0.0361905	1.73183	0.0957658	70.1687	2.12619	101.745	5.62624	31.5766	1.90198
66	summer maize	urea	200	surface	none	92.3	331	230	7.9	12.2	1.2	1.19436	0.0361905	2.05519	0.0711034	70.1687	2.12619	120.742	4.17733	50.5734	1.48225
66	summer maize	urea	200	subsurface	none	92.3	331	230	7.9	12.2	1.2	1.19436	0.0361905	1.38433	0.0616026	70.1687	2.12619	81.3292	3.61915	11.1605	1.32736
66	summer maize	urea	200	subsurface	none	92.3	331	230	7.9	12.2	1.2	1.19436	0.0361905	1.53549	0.07232	70.1687	2.12619	90.2098	4.2488	20.041	1.50243
66	summer maize	urea	341	subsurface	none	92.3	331	230	7.9	12.2	1.2	1.19436	0.0361905	3.01109	0.117333	70.1687	2.12619	176.901	6.89333	106.733	2.2812
66	summer maize	urea	341	subsurface	none	92.3	331	230	7.9	12.2	1.2	1.19436	0.0361905	2.13862	0.103165	70.1687	2.12619	125.644	6.06097	55.4752	2.03116
66	summer maize	urea	400	surface	none	92.3	331	230	7.9	12.2	1.2	1.19436	0.0361905	2.91783	0.117241	70.1687	2.12619	171.423	6.88793	101.254	2.27957
66	summer maize	urea	300	surface	none	92.3	331	230	7.9	12.2	1.2	1.19436	0.0361905	3.83781	0.144815	70.1687	2.12619	225.471	8.50787	155.303	2.77317
69	spring maize	none	0	none	none	114.3	314.8	43	8.7	17.9	1.3	0.935673	0.0657143	0.935673	0.0914286	54.9708	3.86071	54.9708	5.37143	0	2.09183
69	spring maize	urea	150	subsurface	none	114.3	314.8	43	8.7	17.9	1.3	0.935673	0.0657143	1.02534	0.155641	54.9708	3.86071	60.2386	9.14391	5.26784	3.13873
69	spring maize	urea	150	subsurface	none	114.3	314.8	43	8.7	17.9	1.3	0.935673	0.0657143	1.18868	0.187297	54.9708	3.86071	69.8349	11.0037	14.8641	3.68764
69	spring maize	urea	150	subsurface	none	114.3	314.8	43	8.7	17.9	1.3	0.935673	0.0657143	1.05537	0.0830769	54.9708	3.86071	62.0033	4.88077	7.0325	1.96792
69	spring maize	urea	150	subsurface	none	114.3	314.8	43	8.7	17.9	1.3	0.935673	0.0657143	0.870313	0.0705063	54.9708	3.86071	51.1309	4.14225	3.8399	1.79062
69	spring maize	none	0	none	none	114.3	314.8	43	8.7	17.9	1.3	0.935673	0.0657143	1.81287	0.172222	54.9708	3.86071	106.506	10.1181	51.5351	3.42462
69	spring maize	OA	0	surface	none	114.3	314.8	43	8.7	17.9	1.3	0.935673	0.0657143	1.83525	0.127733	54.9708	3.86071	107.821	7.50433	52.8501	2.66871
69	spring maize	OA	0	surface	none	114.3	314.8	43	8.7	17.9	1.3	0.935673	0.0657143	6.85043	0.712444	54.9708	3.86071	402.463	41.8561	347.492	13.2923
69	spring maize	OA	0	surface	none	114.3	314.8	43	8.7	17.9	1.3	0.935673	0.0657143	3.23752	0.235072	54.9708	3.86071	190.205	13.8105	135.234	4.5347
70	maize	none	0	none	none	110.9	387.9	339	6.6	29.6	1.7	2.24728	0.0235294	2.24728	0.0625	132.028	1.38235	132.028	3.67188	0	1.24071
70	maize	urea	240	subsurface	none	110.9	387.9	339	6.6	29.6	1.7	2.24728	0.0235294	4.35629	0.116518	132.028	1.38235	255.932	6.84542	123.905	2.20841
70	maize	urea	215.4	subsurface	mulch	110.9	387.9	339	6.6	29.6	1.7	2.24728	0.0235294	3.91122	0.119212	132.028	1.38235	229.784	7.00369	97.7564	2.25749
70	maize	IU	240	subsurface	none	110.9	387.9	339	6.6	29.6	1.7	2.24728	0.0235294	3.73515	0.110138	132.028	1.38235	219.44	6.47062	87.4126	2.09236
71	maize	none	0	none	none	113.1	440.9	263	7.1	21.55	1.6	3.15539	0.0194444	3.15539	0.184259	185.379	1.14236	185.379	10.8252	0	3.44225
71	maize	UOCF	224	surface	none	113.1	440.9	263	7.1	21.55	1.6	3.15539	0.0194444	4.51404	0.163901	185.379	1.14236	265.2	9.6292	79.8208	3.06637
71	maize	IU	224	surface	none	113.1	440.9	263	7.1	21.55	1.6	3.15539	0.0194444	3.14622	0.0943012	185.379	1.14236	184.84	5.5402	0.538803	1.78882
71	maize	IU	224	surface	none	113.1	440.9	263	7.1	21.55	1.6	3.15539	0.0194444	5.99677	0.231111	185.379	1.14236	352.31	13.5778	166.931	4.30884
71	maize	IU	224	surface	none	113.1	440.9	263	7.1	21.55	1.6	3.15539	0.0194444	3.29949	0.122432	185.379	1.14236	193.845	7.19285	8.46595	2.30309
71	maize	IU	224	subsurface	none	113.1	440.9	263	7.1	21.55	1.6	3.15539	0.0194444	3.18794	0.118107	185.379	1.14236	187.292	6.93879	1.9125	2.22377
71	maize	IU	224	subsurface	none	113.1	440.9	263	7.1	21.55	1.6	3.15539	0.0194444	3.07307	0.120573	185.379	1.14236	180.543	7.08368	4.83661	2.269
71	maize	IU	224	subsurface	none	113.1	440.9	263	7.1	21.55	1.6	3.15539	0.0194444	3.15447	0.10652	185.379	1.14236	185.325	6.25806	0.0542395	2.01167
71	maize	IU	224	subsurface	none	113.1	440.9	263	7.1	21.55	1.6	3.15539	0.0194444	3.04455	0.108057	185.379	1.14236	178.868	6.34836	6.51165	2.03977
71	maize	IU	224	subsurface	none	113.1	440.9	263	7.1	21.55	1.6	3.15539	0.0194444	3.26555	0.0962245	185.379	1.14236	191.851	5.65319	6.47201	1.82383
72	spring maize	none	0	none	none	106	592.6	227	5.5	25.7	1.4	4.68808	0.0634518	4.68808	0.18256	275.425	3.72779	275.425	10.7254	0	3.59069
72	spring maize	urea	180	subsurface	none	106	592.6	227	5.5	25.7	1.4	4.68808	0.0634518	7.06638	0.487561	275.425	3.72779	415.15	28.6442	139.725	9.13448
72	spring maize	IU	180	subsurface	none	106	592.6	227	5.5	25.7	1.4	4.68808	0.0634518	7.62172	0.51096	275.425	3.72779	447.776	30.0189	172.351	9.56572
72	spring maize	IU	144	subsurface	none	106	592.6	227	5.5	25.7	1.4	4.68808	0.0634518	7.05264	0.366074	275.425	3.72779	414.342	21.5068	138.918	6.90246
73	spring maize	none	0	none	none	104.1	553.9	227	7.9	17.6	1.2	0.863446	0.0139594	0.863446	0.075	50.7275	0.820114	50.7275	4.40625	0	1.41731
73	spring maize	urea	224	surface	none	104.1	553.9	227	7.9	17.6	1.2	0.863446	0.0139594	6.39502	0.275091	50.7275	0.820114	375.707	16.1616	324.98	5.11732
73	spring maize	IU	224	surface	none	104.1	553.9	227	7.9	17.6	1.2	0.863446	0.0139594	6.73828	0.566043	50.7275	0.820114	395.874	33.255	345.146	10.5194
73	spring maize	urea	224	surface	none	104.1	553.9	227	7.9	17.6	1.2	0.863446	0.0139594	5.52368	0.383506	50.7275	0.820114	324.516	22.531	273.789	7.12965
73	spring maize	IU	224	surface	none	104.1	553.9	227	7.9	17.6	1.2	0.863446	0.0139594	5.33306	0.2714	50.7275	0.820114	313.317	15.9448	262.59	5.04884
73	spring maize	IU	224	surface	none	104.1	553.9	227	7.9	17.6	1.2	0.863446	0.0139594	4.84906	0.309829	50.7275	0.820114	284.882	18.2024	234.155	5.76195
73	spring maize	IU	224	surface	inhibitor	104.1	553.9	227	7.9	17.6	1.2	0.863446	0.0139594	5.06121	0.36476	50.7275	0.820114	297.346	21.4297	246.618	6.78161
74	maize	none	0	none	none	113.3	363.4	360	7.1	22.3	1.6	1.57317	0.0625	1.57317	0.115179	92.4238	3.67188	92.4238	6.76674	0	2.43457
74	maize	urea	225	surface	none	113.3	363.4	360	7.1	22.3	1.6	1.57317	0.0625	5.5284	0.349844	92.4238	3.67188	324.793	20.5533	232.369	6.60244
74	maize	none	0	none	none	113.3	363.4	360	7.1	22.3	1.6	1.57317	0.0625	1.57317	0.102381	92.4238	3.67188	92.4238	6.01488	0	2.22849
74	maize	urea	98	surface	none	113.3	363.4	360	7.1	22.3	1.6	1.57317	0.0625	2.84892	0.138947	92.4238	3.67188	167.374	8.16316	74.9503	2.83054
74	maize	urea	225	surface	none	113.3	363.4	360	7.1	22.3	1.6	1.57317	0.0625	3.3836	0.161899	92.4238	3.67188	198.786	9.51155	106.363	3.22416
74	maize	urea	157	surface	none	113.3	363.4	360	7.1	22.3	1.6	1.57317	0.0625	2.79516	0.139758	92.4238	3.67188	164.216	8.21079	71.7919	2.84429
74	maize	OA	0	none	none	113.3	363.4	360	7.1	22.3	1.6	0.543902	0.0196429	0.403986	0.0163971	31.9543	1.15402	23.7341	0.963327	8.22012	0.475369
74	maize	UOA	225	surface	none	113.3	363.4	360	7.1	22.3	1.6	0.543902	0.0196429	1.94405	0.0773934	31.9543	1.15402	114.213	4.54686	82.2585	1.48343
74	maize	OA	0	none	none	113.3	363.4	360	7.1	22.3	1.6	0.514634	0.0196429	0.0619925	0.0026813	30.2348	1.15402	3.64206	0.157526	26.5927	0.368317
74	maize	UOA	98	surface	none	113.3	363.4	360	7.1	22.3	1.6	0.514634	0.0196429	0.761097	0.0360214	30.2348	1.15402	44.7144	2.11626	14.4797	0.762253
74	maize	UOA	225	surface	none	113.3	363.4	360	7.1	22.3	1.6	0.514634	0.0196429	2.62841	0.160371	30.2348	1.15402	154.419	9.4218	124.184	3.0017
74	maize	UOA	157	surface	none	113.3	363.4	360	7.1	22.3	1.6	0.514634	0.0196429	2.59333	0.154735	30.2348	1.15402	152.358	9.09069	122.123	2.8978
6	maize	none	0	none	none	108	385.8	339	6.8	20.1	1.1	1.38232	0.0326619	1.38232	0.0976229	81.2115	1.91889	81.2115	5.73535	0	1.91249
6	maize	urea	150	surface	none	108	385.8	339	6.8	20.1	1.1	1.38232	0.0326619	1.75583	0.109063	81.2115	1.91889	103.155	6.40742	21.9434	2.11512
6	maize	urea	225	surface	none	108	385.8	339	6.8	20.1	1.1	1.38232	0.0326619	1.84537	0.23038	81.2115	1.91889	108.416	13.5348	27.2043	4.32288
6	maize	urea	300	surface	none	108	385.8	339	6.8	20.1	1.1	1.38232	0.0326619	2.2021	0.135029	81.2115	1.91889	129.374	7.93293	48.1621	2.58096
6	maize	urea	225	surface	none	108	385.8	339	6.8	20.1	1.1	1.38232	0.0326619	1.54568	0.0625562	81.2115	1.91889	90.8086	3.67518	9.59718	1.31107
75	summer maize	none	0	none	none	108.4	359.8	339	6.8	12.1	1.1	1.38232	0.0308474	1.38232	0.0437398	81.2115	1.81228	81.2115	2.56972	0	0.994375
75	summer maize	urea	150	surface	none	108.4	359.8	339	6.8	12.1	1.1	1.38232	0.0308474	1.75583	0.0753237	81.2115	1.81228	103.155	4.42527	21.9434	1.5122
75	summer maize	urea	225	surface	none	108.4	359.8	339	6.8	12.1	1.1	1.38232	0.0308474	1.84537	0.0832	81.2115	1.81228	108.416	4.888	27.2043	1.64854
75	summer maize	urea	300	surface	none	108.4	359.8	339	6.8	12.1	1.1	1.38232	0.0308474	2.2021	0.102446	81.2115	1.81228	129.374	6.01868	48.1621	1.98768
75	summer maize	urea	225	surface	none	108.4	359.8	339	6.8	12.1	1.1	1.38232	0.0308474	1.54568	0.0626	81.2115	1.81228	90.8086	3.67775	9.59718	1.29654
77	maize	none	0	none	none	107.1	445.8	421	6.4	7.3	0.3	2.11529	0.0181818	2.11529	0.0742975	124.274	1.06818	124.274	4.36498	0	1.42106
77	maize	OA	187.5	surface	none	107.1	445.8	421	6.4	7.3	0.3	2.11529	0.0181818	2.00369	0.0798529	124.274	1.06818	117.717	4.69136	6.55674	1.52151
77	maize	OA	262.5	surface	none	107.1	445.8	421	6.4	7.3	0.3	2.11529	0.0181818	2.29713	0.105034	124.274	1.06818	134.957	6.17078	10.6831	1.98039
77	maize	UOCF	187.5	surface	none	107.1	445.8	421	6.4	7.3	0.3	2.11529	0.0181818	1.69159	0.0642604	124.274	1.06818	99.3808	3.7753	24.8927	1.24072
77	maize	UOCF	262.5	surface	none	107.1	445.8	421	6.4	7.3	0.3	2.11529	0.0181818	2.03067	0.0875287	124.274	1.06818	119.302	5.14231	4.97186	1.66086
77	maize	UOCFOA	187.5	surface	none	107.1	445.8	421	6.4	7.3	0.3	2.11529	0.0181818	1.66564	0.0798529	124.274	1.06818	97.8566	4.69136	26.4169	1.52151
79	maize	none	0	none	none	122.1	406.4	379	6.6	14.6	1.3	1.72414	0.0176871	1.72414	0.0510204	101.293	1.03912	101.293	2.99745	0	1.00322
79	maize	urea	240	subsurface	none	122.1	406.4	379	6.6	14.6	1.3	1.72414	0.0176871	4.30247	0.159314	101.293	1.03912	252.77	9.35971	151.477	2.97799
79	maize	IU	240	subsurface	none	122.1	406.4	379	6.6	14.6	1.3	1.72414	0.0176871	1.5625	0.0611413	101.293	1.03912	91.7969	3.59205	9.49623	1.18248
79	maize	IU	240	subsurface	inhibitor	122.1	406.4	379	6.6	14.6	1.3	1.72414	0.0176871	1.41304	0.0566667	101.293	1.03912	83.0163	3.32917	18.2768	1.10286
79	maize	IU	240	subsurface	inhibitor	122.1	406.4	379	6.6	14.6	1.3	1.72414	0.0176871	1.54511	0.0708621	101.293	1.03912	90.7754	4.16315	10.5177	1.35689
79	maize	IU	240	subsurface	inhibitor	122.1	406.4	379	6.6	14.6	1.3	1.72414	0.0176871	1.54092	0.0767516	101.293	1.03912	90.5291	4.50916	10.764	1.46329
82	maize	none	0	none	none	105.1	295.9	371	8.1	18.8	1.4	2.26399	0.0467391	2.26399	0.0858696	133.01	2.74592	133.01	5.04484	0	1.81633
82	maize	urea	160	surface	none	105.1	295.9	371	8.1	18.8	1.4	2.26399	0.0467391	4.73138	0.22744	133.01	2.74592	277.968	13.3621	144.959	4.31377
82	maize	urea	160	surface	biochar	106.8	378.5	371	8.1	18.8	1.4	2.26399	0.0467391	3.39686	0.185043	133.01	2.74592	199.566	10.8713	66.5561	3.54576
82	maize	urea	160	surface	biochar	106.8	378.5	371	8.1	18.8	1.4	2.26399	0.0467391	3.42821	0.0905102	133.01	2.74592	201.408	5.31747	68.3981	1.8925
83	maize	none	0	none	none	109.4	397.5	371	5.4	18.1	1.2	0.81457	0.0113032	0.81457	0.0245346	47.856	0.664062	47.856	1.44141	0	0.50186
83	maize	urea	240	subsurface	none	109.4	397.5	371	5.4	18.1	1.2	0.81457	0.0113032	4.21791	0.206479	47.856	0.664062	247.802	12.1306	199.947	3.84179
83	maize	UIU	240	subsurface	none	109.4	397.5	371	5.4	18.1	1.2	0.81457	0.0113032	2.59026	0.140528	47.856	0.664062	152.178	8.25604	104.322	2.61922
83	maize	UIU	210	subsurface	none	109.4	397.5	371	5.4	18.1	1.2	0.81457	0.0113032	3.09289	0.137119	47.856	0.664062	181.707	8.05576	133.851	2.5561
83	maize	UIU	180	subsurface	none	109.4	397.5	371	5.4	18.1	1.2	0.81457	0.0113032	3.13761	0.12825	47.856	0.664062	184.335	7.53469	136.479	2.39191
85	maize	none	0	none	none	73.8	128.3	123	8.3	11.2	1	1.58059	0.0169643	1.58059	0.081875	92.8597	0.996652	92.8597	4.81016	0	1.55341
85	maize	urea	300	surface	mulch	73.8	128.3	123	8.3	11.2	1	1.58059	0.0169643	2.85706	0.152699	92.8597	0.996652	167.852	8.97105	74.9926	2.85435
85	maize	urea	300	subsurface	mulch	73.8	128.3	123	8.3	11.2	1	1.58059	0.0169643	2.57164	0.145965	92.8597	0.996652	151.084	8.57544	58.224	2.73005
85	maize	urea	300	surface	none	73.8	128.3	123	8.3	11.2	1	1.58059	0.0169643	4.00308	0.195972	92.8597	0.996652	235.181	11.5134	142.321	3.65447
85	maize	OCF	140	surface	none	73.8	128.3	123	8.3	11.2	1	1.58059	0.0169643	1.98834	0.0936842	92.8597	0.996652	116.815	5.50395	23.9551	1.76881
85	maize	urea	300	surface	inhibitor	73.8	128.3	123	8.3	11.2	1	1.58059	0.0169643	4.64101	0.2455	92.8597	0.996652	272.66	14.4231	179.8	4.57187
85	maize	urea	300	subsurface	mulch	73.8	128.3	123	8.3	11.2	1	1.58059	0.0169643	3.79105	0.222194	92.8597	0.996652	222.724	13.0539	129.864	4.14001
85	maize	urea	300	surface	mulch	73.8	128.3	123	8.3	11.2	1	1.58059	0.0169643	4.3248	0.168454	92.8597	0.996652	254.082	9.89668	161.222	3.14543
88	maize	none	0	none	none	73.8	128.3	123	8.3	11.2	1	0.0419913	0.00550459	0.0419913	0.00177982	2.46699	0.323394	2.46699	0.104564	0	0.107479
88	maize	urea	241.5	subsurface	none	73.8	128.3	123	8.3	11.2	1	0.0419913	0.00550459	3.10197	0.153326	2.46699	0.323394	182.24	9.00789	179.773	2.85038
88	maize	urea	151.8	subsurface	none	73.8	128.3	123	8.3	11.2	1	0.0419913	0.00550459	1.94961	0.119806	2.46699	0.323394	114.539	7.03863	112.072	2.22816
88	maize	urea	84.9	subsurface	none	73.8	128.3	123	8.3	11.2	1	0.0419913	0.00550459	2.06719	0.0778235	2.46699	0.323394	121.447	4.57213	118.98	1.44945
88	maize	urea	216.7	subsurface	none	73.8	128.3	123	8.3	11.2	1	0.0419913	0.00550459	2.05295	0.0919787	2.46699	0.323394	120.611	5.40375	118.144	1.71187
12	summer maize	none	0	none	none	74.9	226	170	7.8	26.7	1.4	1.64174	0.0141791	1.64174	0.0393284	96.4525	0.833022	96.4525	2.31054	0	0.776693
12	summer maize	urea	60	surface	none	74.9	226	170	7.8	26.7	1.4	1.64174	0.0141791	3.32394	0.0802721	96.4525	0.833022	195.282	4.71599	98.8292	1.51441
12	summer maize	urea	120	surface	none	74.9	226	170	7.8	26.7	1.4	1.64174	0.0141791	4.06601	0.105253	96.4525	0.833022	238.878	6.18362	142.426	1.9731
12	summer maize	urea	180	surface	none	74.9	226	170	7.8	26.7	1.4	1.64174	0.0141791	4.82096	0.138868	96.4525	0.833022	283.231	8.15849	186.779	2.59335
13	summer maize	none	0	none	none	53.5	98.6	170	7.9	26.7	1.4	0.690409	0.00666667	0.690409	0.0163704	40.5615	0.391667	40.5615	0.961759	0	0.328388
13	summer maize	urea	120	surface	none	53.5	98.6	170	7.9	26.7	1.4	0.690409	0.00666667	1.69903	0.0482759	40.5615	0.391667	99.818	2.83621	59.2564	0.905399
13	summer maize	urea	240	surface	none	53.5	98.6	170	7.9	26.7	1.4	0.690409	0.00666667	2.30326	0.0731707	40.5615	0.391667	135.317	4.29878	94.7552	1.36502
13	summer maize	urea	360	surface	none	53.5	98.6	170	7.9	26.7	1.4	0.690409	0.00666667	3.15615	0.0788382	40.5615	0.391667	185.424	4.63174	144.862	1.46991
14	summer maize	none	0	none	none	100.4	633.1	140	7.3	10.8	0.8	1.16548	0.0225225	1.16548	0.059009	68.472	1.3232	68.472	3.46678	0	1.17343
14	summer maize	OA	200	subsurface	none	100.4	633.1	140	7.3	10.8	0.8	1.16548	0.0225225	1.8146	0.101885	68.472	1.3232	106.608	5.98576	38.1357	1.93856
14	summer maize	OA	100	subsurface	none	100.4	633.1	140	7.3	10.8	0.8	1.16548	0.0225225	1.86601	0.0884091	68.472	1.3232	109.628	5.19403	41.1559	1.69496
14	summer maize	urea	200	subsurface	none	102	426.9	140	7.3	10.8	0.8	1.16548	0.0225225	4.15768	0.24879	68.472	1.3232	244.264	14.6164	175.792	4.64102
14	summer maize	urea	100	subsurface	none	102	426.9	140	7.3	10.8	0.8	1.16548	0.0225225	3.98797	0.186761	68.472	1.3232	234.293	10.9722	165.821	3.49485
14	summer maize	OA	200	subsurface	none	100.4	633.1	140	7.3	10.8	0.8	1.16548	0.0225225	2.20475	0.0977632	68.472	1.3232	129.529	5.74359	61.057	1.86386
14	summer maize	OA	100	subsurface	none	100.4	633.1	140	7.3	10.8	0.8	1.16548	0.0225225	2.12745	0.0798773	68.472	1.3232	124.988	4.69279	56.5158	1.54185
14	summer maize	urea	200	subsurface	none	102	426.9	140	7.3	10.8	0.8	1.16548	0.0225225	4.00842	0.186797	68.472	1.3232	235.494	10.9743	167.022	3.49553
14	summer maize	urea	100	subsurface	none	102	426.9	140	7.3	10.8	0.8	1.16548	0.0225225	3.90017	0.202903	68.472	1.3232	229.135	11.9206	160.663	3.79277
14	summer maize	OA	200	subsurface	none	100.4	633.1	140	7.3	10.8	0.8	1.16548	0.0225225	2.36183	0.104527	68.472	1.3232	138.758	6.14096	70.2857	1.98651
14	summer maize	OA	100	subsurface	none	100.4	633.1	140	7.3	10.8	0.8	1.16548	0.0225225	2.3124	0.10363	68.472	1.3232	135.853	6.08824	67.3813	1.97022
14	summer maize	urea	200	subsurface	none	102	426.9	140	7.3	10.8	0.8	1.16548	0.0225225	4.87701	0.229931	68.472	1.3232	286.524	13.5084	218.052	4.29218
14	summer maize	urea	100	subsurface	none	102	426.9	140	7.3	10.8	0.8	1.16548	0.0225225	4.52244	0.185658	68.472	1.3232	265.693	10.9074	197.221	3.47451
14	summer maize	OA	200	subsurface	none	100.4	633.1	140	7.3	10.8	0.8	1.16548	0.0225225	1.96057	0.0817763	68.472	1.3232	115.183	4.80436	46.7114	1.57584
14	summer maize	OA	100	subsurface	none	100.4	633.1	140	7.3	10.8	0.8	1.16548	0.0225225	1.74983	0.0758088	68.472	1.3232	102.803	4.45377	34.3306	1.46925
14	summer maize	urea	200	subsurface	none	102	426.9	140	7.3	10.8	0.8	1.16548	0.0225225	1.95816	0.0721891	68.472	1.3232	115.042	4.24111	46.5702	1.40491
14	summer maize	urea	100	subsurface	none	102	426.9	140	7.3	10.8	0.8	1.16548	0.0225225	4.08711	0.170443	68.472	1.3232	240.118	10.0135	171.646	3.19408
95	summer corn	none	0	none	none	95.2	668.3	122.5	7.5	12.64	0.8	1.3016	0.00859375	1.3016	0.0564062	76.4693	0.504883	76.4693	3.31387	0	1.06003
95	summer corn	urea	330	subsurface	none	95.2	668.3	122.5	7.5	12.64	0.8	1.3016	0.00859375	13.3301	0.756463	76.4693	0.504883	783.146	44.4422	706.676	14.0548
95	summer corn	urea	240	subsurface	none	95.2	668.3	122.5	7.5	12.64	0.8	1.3016	0.00859375	6.50378	0.393662	76.4693	0.504883	382.097	23.1276	305.628	7.31534
95	summer corn	urea	168	subsurface	none	95.2	668.3	122.5	7.5	12.64	0.8	1.3016	0.00859375	2.03892	0.0875622	76.4693	0.504883	119.787	5.14428	43.3176	1.63458
99	summer maize（2016）	none	0	none	none	100.4	633.1	128	7.2	19.4	1.5	1.10105	0.0155556	1.10105	0.0412593	64.6865	0.913889	64.6865	2.42398	0	0.8192
99	summer maize（2016）	urea	200	subsurface	none	100.4	633.1	128	7.2	19.4	1.5	1.10105	0.0155556	4.34007	0.209877	64.6865	0.913889	254.979	12.3303	190.293	3.90988
99	summer maize（2016）	OA	200	subsurface	none	100.4	633.1	128	7.2	19.4	1.5	1.10105	0.0155556	2.0825	0.105686	64.6865	0.913889	122.347	6.20907	57.6604	1.98463
99	summer maize（2016）	UOA	200	subsurface	none	100.4	633.1	128	7.2	19.4	1.5	1.10105	0.0155556	3.29482	0.145622	64.6865	0.913889	193.571	8.55527	128.884	2.72081
99	summer maize（2017）	none	0	none	none	102	426.9	128	7.2	19.4	1.5	0.530778	0.0102041	0.530778	0.0191156	31.1832	0.59949	31.1832	1.12304	0	0.402569
99	summer maize（2017）	urea	200	subsurface	none	102	426.9	128	7.2	19.4	1.5	0.530778	0.0102041	3.88145	0.176982	31.1832	0.59949	228.035	10.3977	196.852	3.2935
99	summer maize（2017）	OA	200	subsurface	none	102	426.9	128	7.2	19.4	1.5	0.530778	0.0102041	1.53548	0.0732026	31.1832	0.59949	90.2097	4.30065	59.0265	1.37314
99	summer maize（2017）	UOA	200	subsurface	none	102	426.9	128	7.2	19.4	1.5	0.530778	0.0102041	2.99885	0.145089	31.1832	0.59949	176.182	8.52396	144.999	2.70217
106	corn	none	0	none	none	95.1	473	128	8.5	6.2	0.4	1.50637	0.0147287	1.50637	0.0606977	88.499	0.86531	88.499	3.56599	0	1.16039
106	corn	urea	210	surface	none	95.1	473	128	8.5	6.2	0.4	1.50637	0.0147287	3.62223	0.102338	88.499	0.86531	212.806	6.01238	124.307	1.92087
106	corn	urea	300	surface	none	95.1	473	128	8.5	6.2	0.4	1.50637	0.0147287	5.15412	0.13897	88.499	0.86531	302.805	8.16448	214.306	2.5963
106	corn	IU	210	surface	none	95.1	473	128	8.5	6.2	0.4	1.50637	0.0147287	2.89102	0.0823039	88.499	0.86531	169.847	4.83536	81.3482	1.55336
106	corn	IU	300	surface	none	95.1	473	128	8.5	6.2	0.4	1.50637	0.0147287	3.31218	0.0841569	88.499	0.86531	194.591	4.94422	106.092	1.58726
106	corn	IU	210	surface	none	95.1	473	128	8.5	6.2	0.4	1.50637	0.0147287	2.51684	0.0747761	88.499	0.86531	147.865	4.3931	59.3656	1.41591
106	corn	IU	300	surface	none	95.1	473	128	8.5	6.2	0.4	1.50637	0.0147287	2.94355	0.0966995	88.499	0.86531	172.933	5.6811	84.4344	1.81724
107	summer corn	none	0	none	none	101.8	295.8	128	8.5	12.2	0.8	1.71545	0.031	1.71545	0.0888	100.783	1.82125	100.783	5.217	0	1.7474
107	summer corn	urea	250	surface	none	101.8	295.8	128	8.5	12.2	0.8	1.71545	0.031	4.42386	0.108531	100.783	1.82125	259.902	6.37618	159.119	2.09697
107	summer corn	urea	250	surface	none	101.8	295.8	128	8.5	12.2	0.8	1.71545	0.031	5.43626	0.20493	100.783	1.82125	319.38	12.0396	218.598	3.85057
107	summer corn	urea	250	subsurface	none	101.8	295.8	128	8.5	12.2	0.8	1.71545	0.031	3.21111	0.085	100.783	1.82125	188.653	4.99375	87.8698	1.68091
108	maize	none	0	none	none	98.1	785.1	126	7.9	10.3	1	0.270009	0.0248	0.270009	0.0116	15.863	1.457	15.863	0.6815	0	0.508654
108	maize	urea	100	surface	none	98.1	785.1	126	7.9	10.3	1	0.270009	0.0248	1.60093	0.0453219	15.863	1.457	94.0549	2.66266	78.1919	0.959824
108	maize	urea	150	surface	none	98.1	785.1	126	7.9	10.3	1	0.270009	0.0248	3.07263	0.0945327	15.863	1.457	180.517	5.5538	164.654	1.8157
108	maize	urea	225	surface	none	98.1	785.1	126	7.9	10.3	1	0.270009	0.0248	23.4488	0.116899	15.863	1.457	1377.62	6.86783	1361.75	2.22013
108	maize	urea	300	surface	none	98.1	785.1	126	7.9	10.3	1	0.270009	0.0248	6.93699	0.18829	15.863	1.457	407.548	11.062	391.685	3.52833
108	maize	urea	150	subsurface	none	98.7	439.9	126	7.9	10.3	1	0.270009	0.0248	3.19614	0.0849393	15.863	1.457	187.773	4.99018	171.91	1.64392
108	maize	urea	225	subsurface	none	98.7	439.9	126	7.9	10.3	1	0.270009	0.0248	5.57459	0.154672	15.863	1.457	327.507	9.08697	311.644	2.91026
108	maize	urea	300	subsurface	none	98.7	439.9	126	7.9	10.3	1	0.270009	0.0248	6.96944	0.208525	15.863	1.457	409.455	12.2508	393.592	3.90135
96	maize	none	0	none	none	96.6	312.2	245	8.2	5.6	0.2	0.442529	0.0107477	0.442529	0.0107944	25.9986	0.631425	25.9986	0.634171	0	0.282996
96	maize	OCF	180	surface	none	96.6	312.2	245	8.2	5.6	0.2	0.442529	0.0107477	0.431373	0.0104348	25.9986	0.631425	25.3431	0.613043	0.655426	0.278302
96	maize	urea	180	surface	none	96.6	312.2	245	8.2	5.6	0.2	0.442529	0.0107477	1.67708	0.0394286	25.9986	0.631425	98.5286	2.31643	72.5301	0.759246
96	maize	IU	180	surface	none	97.2	310.4	245	8.2	5.6	0.2	0.442529	0.0107477	1.1789	0.0314694	25.9986	0.631425	69.2603	1.84883	43.2618	0.617807
96	maize	IU	180	surface	none	97.2	310.4	245	8.2	5.6	0.2	0.442529	0.0107477	1.18349	0.036	25.9986	0.631425	69.5298	2.115	43.5313	0.697992
96	maize	IU	180	surface	none	96.6	312.2	245	8.2	5.6	0.2	0.442529	0.0107477	0.901786	0.0241434	25.9986	0.631425	52.9799	1.41843	26.9813	0.490982
96	maize	IU	180	surface	none	97.2	310.4	245	8.2	5.6	0.2	0.442529	0.0107477	0.557018	0.0173973	25.9986	0.631425	32.7248	1.02209	6.72622	0.379916
104	maize	none	0	none	none	101.3	301.1	421	8.6	10.2	1	0.727876	0.0170732	0.727876	0.0160488	42.7627	1.00305	42.7627	0.942866	0	0.435328
104	maize	urea	135	surface	none	101.3	301.1	421	8.6	10.2	1	0.727876	0.0170732	2.87269	0.072757	42.7627	1.00305	168.771	4.27447	126.008	1.38842
104	maize	urea	270	surface	none	101.3	301.1	421	8.6	10.2	1	0.727876	0.0170732	3.38248	0.0990171	42.7627	1.00305	198.721	5.81725	155.958	1.86672
104	maize	urea	405	surface	none	101.3	301.1	421	8.6	10.2	1	0.727876	0.0170732	3.54239	0.121931	42.7627	1.00305	208.116	7.16347	165.353	2.28739
104	maize	urea	540	surface	none	101.3	301.1	421	8.6	10.2	1	0.727876	0.0170732	5.07143	0.199065	42.7627	1.00305	297.946	11.6951	255.184	3.71189
105	summer maize	none	0	none	none	97.3	439.5	315	8.6	8.9	0.8	1.00574	0.0162791	1.00574	0.0244651	59.087	0.956395	59.087	1.43733	0	0.545948
105	summer maize	urea	300	surface	none	97.3	439.5	315	8.6	8.9	0.8	1.00574	0.0162791	3.28178	0.115353	59.087	0.956395	192.805	6.77697	133.718	2.1643
105	summer maize	urea	210	surface	none	97.3	439.5	315	8.6	8.9	0.8	1.00574	0.0162791	2.32525	0.0824576	59.087	0.956395	136.608	4.84439	77.5213	1.5615
105	summer maize	urea	210	surface	none	97.3	439.5	315	8.6	8.9	0.8	1.00574	0.0162791	1.91211	0.0634109	59.087	0.956395	112.336	3.72539	53.2494	1.21627
121	maize	none	0	none	none	97.3	412.2	22.3	26.1	7	1.6	0.271081	0.00888889	0.271081	0.0174815	15.926	0.522222	15.926	1.02704	0	0.364352
121	maize	urea	240	subsurface	none	97.3	412.2	22.3	26.1	7	1.6	0.271081	0.00888889	1.63081	0.0820896	15.926	0.522222	95.8103	4.82276	79.8843	1.53401
121	maize	DU	180	subsurface	none	97.3	412.2	22.3	26.1	7	1.6	0.271081	0.00888889	0.372381	0.0174408	15.926	0.522222	21.8774	1.02464	5.95137	0.363677
121	maize	CU	180	subsurface	none	97.3	412.2	22.3	26.1	7	1.6	0.271081	0.00888889	0.338944	0.0164615	15.926	0.522222	19.913	0.967115	3.98695	0.347567
121	maize	CDU	180	subsurface	none	97.3	412.2	22.3	26.1	7	1.6	0.271081	0.00888889	0.343091	0.0204294	15.926	0.522222	20.1566	1.20023	4.23058	0.413916
123	summer maize	none	0	none	none	97.3	332.94	21.6	15.8	8.3	0.9	0.595592	0.0185484	0.595592	0.0379032	34.991	1.08972	34.991	2.22681	0	0.783976
123	summer maize	urea	50	subsurface	none	97.3	332.94	21.6	15.8	8.3	0.9	0.595592	0.0185484	1.0677	0.0363498	34.991	1.08972	62.7276	2.13555	27.7365	0.75816
123	summer maize	urea	100	subsurface	none	97.3	332.94	21.6	15.8	8.3	0.9	0.595592	0.0185484	1.25728	0.0408013	34.991	1.08972	73.8654	2.39708	38.8744	0.832674
123	summer maize	urea	150	subsurface	none	97.3	332.94	21.6	15.8	8.3	0.9	0.595592	0.0185484	1.39676	0.0469255	34.991	1.08972	82.0596	2.75687	47.0686	0.937434
123	summer maize	urea	200	subsurface	none	97.3	332.94	21.6	15.8	8.3	0.9	0.595592	0.0185484	1.56651	0.0539744	34.991	1.08972	92.0326	3.17099	57.0415	1.06032
123	summer maize	urea	250	subsurface	none	97.3	332.94	21.6	15.8	8.3	0.9	0.595592	0.0185484	1.926	0.0627869	34.991	1.08972	113.152	3.68873	78.1614	1.21631
123	summer maize	urea	300	subsurface	none	97.3	332.94	21.6	15.8	8.3	0.9	0.595592	0.0185484	3.2331	0.0844693	34.991	1.08972	189.945	4.96257	154.954	1.60669
123	summer maize	urea	400	subsurface	none	97.3	332.94	21.6	15.8	8.3	0.9	0.595592	0.0185484	4.09468	0.117184	34.991	1.08972	240.562	6.88453	205.571	2.20418
124	summer maize	urea + manure	198.35	surface	none	97.5	480	23.3	9.24	5.8	1.1	0.337704	0.0104478	4.11013	0.137569	19.8401	0.613806	241.47	8.08216	221.63	2.56316
124	summer maize	urea + manure	198.35	surface	none	97.5	480	23.3	9.24	5.8	1.1	0.337704	0.0104478	5.10237	0.172697	19.8401	0.613806	299.764	10.146	279.924	3.2143
124	summer maize	urea + manure	198.35	surface	none	97.5	480	23.3	9.24	5.8	1.1	0.337704	0.0104478	4.18534	0.1382	19.8401	0.613806	245.889	8.11925	226.049	2.57486
115	summer corn	none	0	none	none	116.9	340.7	176	58	62.5	3.5	2.63415	0.0227273	2.63415	0.0981818	154.756	1.33523	154.756	5.76818	0	1.87229
115	summer corn	urea	240	subsurface	none	116.9	340.7	176	58	62.5	3.5	2.63415	0.0227273	5.29689	0.346667	154.756	1.33523	311.193	20.3667	156.436	6.45433
115	summer corn	IU	240	subsurface	none	116.9	340.7	176	58	62.5	3.5	2.63415	0.0227273	2.15691	0.116582	154.756	1.33523	126.718	6.84921	28.0377	2.20668
115	summer corn	IU	216	subsurface	none	116.9	340.7	176	58	62.5	3.5	2.63415	0.0227273	2.27407	0.0872986	154.756	1.33523	133.602	5.12879	21.1542	1.67593
115	summer corn	IU	192	subsurface	none	116.9	340.7	176	58	62.5	3.5	2.63415	0.0227273	2.39283	0.0780508	154.756	1.33523	140.579	4.58549	14.1774	1.51028
115	summer corn	IU	168	subsurface	none	116.9	340.7	176	58	62.5	3.5	2.63415	0.0227273	2.57622	0.0745749	154.756	1.33523	151.353	4.38128	3.40295	1.44839
110	spring corn	none	0	none	none	108	577	236	5.8	62.2	3.5	2.67203	0.168	2.67203	0.4192	156.982	9.87	156.982	24.628	0	8.3902
110	spring corn	urea	240	surface	none	108	577	236	5.8	62.2	3.5	2.67203	0.168	4.43788	0.8625	156.982	9.87	260.726	50.6719	103.744	16.325
110	spring corn	IU	240	surface	none	108	577	236	5.8	62.2	3.5	2.67203	0.168	4.50859	0.532381	156.982	9.87	264.88	31.2774	107.898	10.3716
110	spring corn	IU	216	surface	none	108	577	236	5.8	62.2	3.5	2.67203	0.168	4.34548	0.198418	156.982	9.87	255.297	11.657	98.3149	4.83015
110	spring corn	IU	192	surface	none	108	577	236	5.8	62.2	3.5	2.67203	0.168	3.98174	0.134123	156.982	9.87	233.927	7.87974	76.9452	3.99384
110	spring corn	IU	168	surface	none	108	577	236	5.8	62.2	3.5	2.67203	0.168	3.74592	0.112035	156.982	9.87	220.073	6.58203	63.091	3.75153
22	maize	none	0	none	none	101.1	457.2	595	7.6	13.6	1.1	1.02381	0.0204918	1.02381	0.0352459	60.1488	1.20389	60.1488	2.0707	0	0.757439
22	maize	urea	300	subsurface	none	101.1	457.2	595	7.6	13.6	1.1	1.02381	0.0204918	4.79872	0.170616	60.1488	1.20389	281.925	10.0237	221.776	3.19255
22	maize	urea	300	subsurface	none	101.1	457.2	595	7.6	13.6	1.1	1.02381	0.0204918	1.4375	0.0537383	60.1488	1.20389	84.4531	3.15713	24.3043	1.06849
22	maize	urea	300	subsurface	none	101.1	457.2	595	7.6	13.6	1.1	1.02381	0.0204918	2.57069	0.0796813	60.1488	1.20389	151.028	4.68127	90.8795	1.52852
22	maize	UOA	300	subsurface	none	101.1	457.2	595	7.6	13.6	1.1	1.02381	0.0204918	3.67454	0.118644	60.1488	1.20389	215.879	6.97034	155.73	2.23685
118	summer corn	none	0	none	none	97.5	764.5	284	7.8	11.23	0.7	0.402597	0.0521739	0.402597	0.0673913	23.6526	3.06522	23.6526	3.95924	0	1.58339
118	summer corn	Urea	175	surface	none	97.5	764.5	284	7.8	11.23	0.7	0.402597	0.0521739	8.40845	1.08545	23.6526	3.06522	493.996	63.7705	470.344	20.1893
118	summer corn	Urea	90	surface	none	99.7	884.6	284	7.8	11.23	0.7	0.402597	0.0521739	7.18845	1.31389	23.6526	3.06522	422.321	77.191	398.669	24.4292
118	summer corn	Urea	60	surface	none	99.7	884.6	284	7.8	11.23	0.7	0.402597	0.0521739	7.48418	1.05111	23.6526	3.06522	439.695	61.7528	416.043	19.552
51	summer maize	none	0	none	none	102.7	324.2	104	7.9	35.5	1.2	1.96005	0.0546875	1.96005	0.122656	115.153	3.21289	115.153	7.20605	0	2.49499
51	summer maize	urea	79	subsurface	none	102.7	324.2	104	7.9	35.5	1.2	1.96005	0.0546875	3.94506	0.26966	115.153	3.21289	231.772	15.8425	116.62	5.11183
51	summer maize	urea	147	subsurface	none	102.7	324.2	104	7.9	35.5	1.2	1.96005	0.0546875	3.5632	0.353534	115.153	3.21289	209.338	20.7701	94.1851	6.6462
51	summer maize	urea	215	subsurface	none	102.7	324.2	104	7.9	35.5	1.2	1.96005	0.0546875	3.85417	0.399281	115.153	3.21289	226.432	23.4577	111.279	7.48724
51	summer maize	urea	375	subsurface	none	102.7	324.2	104	7.9	35.5	1.2	1.96005	0.0546875	5.21059	0.417857	115.153	3.21289	306.122	24.5491	190.969	7.82931
51	summer maize	none	0	none	none	103.4	537.2	104	7.9	35.5	1.2	1.95761	0.0777778	1.95761	0.174444	115.009	4.56944	115.009	10.2486	0	3.54843
51	summer maize	urea	79	surface	none	103.4	537.2	104	7.9	35.5	1.2	1.95761	0.0777778	5.70145	0.44672	115.009	4.56944	334.96	26.2448	219.951	8.42419
51	summer maize	urea	147	surface	none	103.4	537.2	104	7.9	35.5	1.2	1.95761	0.0777778	4.92404	0.383415	115.009	4.56944	289.287	22.5256	174.278	7.26831
51	summer maize	urea	215	surface	none	103.4	537.2	104	7.9	35.5	1.2	1.95761	0.0777778	4.81392	0.366378	115.009	4.56944	282.818	21.5247	167.808	6.9584
51	summer maize	urea	375	surface	none	103.4	537.2	104	7.9	35.5	1.2	1.95761	0.0777778	5.69904	0.544025	115.009	4.56944	334.818	31.9615	219.809	10.2099
54	summer maize (1998)	none	0	none	none	103.4	526.7	104	8.6	9.3	0.6	1.69018	0.0492537	1.69018	0.0983582	99.2979	2.89366	99.2979	5.77854	0	2.04364
54	summer maize (1998)	urea	75	surface	none	103.4	526.7	104	8.6	9.3	0.6	1.69018	0.0492537	1.73429	0.103313	99.2979	2.89366	101.89	6.06963	2.59191	2.12635
54	summer maize (1998)	urea	75	surface	none	103.4	526.7	104	8.6	9.3	0.6	1.69018	0.0492537	1.58814	0.0974194	99.2979	2.89366	93.303	5.72339	5.99489	2.02806
54	summer maize (1998)	urea	200	surface	none	103.4	526.7	104	8.6	9.3	0.6	1.69018	0.0492537	3.1909	0.25027	99.2979	2.89366	187.466	14.7034	88.1676	4.7388
54	summer maize (1998)	urea	200	subsurface	none	103.4	526.7	104	8.6	9.3	0.6	1.69018	0.0492537	2.24864	0.19023	99.2979	2.89366	132.108	11.176	32.8098	3.6507
54	summer maize (1999)	urea	150	surface	none	82.8	68.1	104	8.6	9.3	0.6	1.76774	0.0416	2.75038	0.160897	103.855	2.444	161.585	9.45272	57.7302	3.08751
54	summer maize (1999)	urea	150	subsurface	none	82.8	68.1	104	8.6	9.3	0.6	1.76774	0.0416	1.70737	0.0959763	103.855	2.444	100.308	5.63861	3.54694	1.94337
53	maize 2008	none	0	none	none	100	426.7	137	8.3	10.2	0.6	1.9765	0.015493	1.9765	0.118451	116.119	0.910211	116.119	6.95898	0	2.21937
53	maize 2008	urea	150	surface	none	100	426.7	137	8.3	10.2	0.6	1.9765	0.015493	4.28424	0.274882	116.119	0.910211	251.699	16.1493	135.58	5.11496
53	maize 2008	urea	150	surface	none	100	426.7	137	8.3	10.2	0.6	1.9765	0.015493	2.71942	0.177465	116.119	0.910211	159.766	10.4261	43.6469	3.30955
53	maize 2008	urea	150	subsurface	none	100	426.7	137	8.3	10.2	0.6	1.9765	0.015493	3.13186	0.176132	116.119	0.910211	183.997	10.3477	67.8775	3.28488
53	maize 2008	urea	190	surface	none	100	426.7	137	8.3	10.2	0.6	1.9765	0.015493	2.26435	0.140984	116.119	0.910211	133.031	8.28279	16.9113	2.63502
53	maize 2008	urea	190	surface	none	100	426.7	137	8.3	10.2	0.6	1.9765	0.015493	3.69816	0.225726	116.119	0.910211	217.267	13.2614	101.148	4.20349
53	maize 2008	urea	190	subsurface	none	100	426.7	137	8.3	10.2	0.6	1.9765	0.015493	5.02762	0.28549	116.119	0.910211	295.373	16.7725	179.254	5.31175
53	maize 2008	urea	190	subsurface	none	100	426.7	137	8.3	10.2	0.6	1.9765	0.015493	5.59155	0.295167	116.119	0.910211	328.504	17.3411	212.384	5.49128
53	maize 2008	urea	230	surface	none	100	426.7	137	8.3	10.2	0.6	1.9765	0.015493	3.69806	0.248718	116.119	0.910211	217.261	14.6122	101.141	4.62973
53	maize 2008	urea	230	surface	none	100	426.7	137	8.3	10.2	0.6	1.9765	0.015493	2.7399	0.180083	116.119	0.910211	160.969	10.5799	44.8498	3.35801
53	maize 2008	urea	230	subsurface	none	100	426.7	137	8.3	10.2	0.6	1.9765	0.015493	6.86009	0.452766	116.119	0.910211	403.03	26.6	286.911	8.41658
53	maize 2008	urea	270	surface	none	100	426.7	137	8.3	10.2	0.6	1.9765	0.015493	4.60688	0.398936	116.119	0.910211	270.654	23.4375	154.535	7.41718
53	maize 2008	urea	270	surface	none	100	426.7	137	8.3	10.2	0.6	1.9765	0.015493	4.41463	0.369388	116.119	0.910211	259.36	21.7015	143.24	6.86866
53	maize 2008	urea	270	subsurface	none	100	426.7	137	8.3	10.2	0.6	1.9765	0.015493	3.84892	0.314706	116.119	0.910211	226.124	18.489	110.005	5.85381
112	corn	none	0	none	none	107.8	476.1	270	7.3	39.55	1.8	0.46841	0.00725806	0.46841	0.0346774	27.5191	0.426411	27.5191	2.0373	0	0.658211
112	corn	IU	180	surface	none	107.8	476.1	270	7.3	39.55	1.8	0.46841	0.00725806	2.61807	0.108051	27.5191	0.426411	153.812	6.34799	126.293	2.01193
112	corn	IU	180	subsurface	none	107.8	476.1	270	7.3	39.55	1.8	0.46841	0.00725806	1.21626	0.0367164	27.5191	0.426411	71.4555	2.15709	43.9364	0.695332
112	corn	IU	180	subsurface	none	107.8	476.1	270	7.3	39.55	1.8	0.46841	0.00725806	0.990857	0.0280992	27.5191	0.426411	58.2129	1.65083	30.6938	0.539171
112	corn	IU	180	subsurface	none	107.8	476.1	270	7.3	39.55	1.8	0.46841	0.00725806	1.15889	0.0347826	27.5191	0.426411	68.085	2.04348	40.5659	0.660123
112	corn	IU	180	subsurface	none	107.8	476.1	270	7.3	39.55	1.8	0.46841	0.00725806	1.21309	0.0493617	27.5191	0.426411	71.2691	2.9	43.75	0.926921

## Sheet: Rice AP
																				AP
Id	Crop type			Applicatio depth	Amendments	Driving factors						yield scaled emission (kg N /Mg grains)				Acidification scaled NH3 (acid eq. /Mg grains)				Effect size
		Fertilizer type	N rate			Temperature oC	precipitation mm/season	Clay content (g/kg)	pH	SOM (g/kg)	soil total N (g/kg)	CK	SD	Treat	SD	CK	SD	Treat	SD	mean	SD
5	rice	none	0	none	none	83.8	379.2	360	7.9	19.2	2.4	3.35547	0.0368421	3.35547	0.180842	197.134	2.16447	197.134	10.6245	0	3.42877
5	rice	urea	75	surface	none	83.8	379.2	360	7.9	19.2	2.4	3.35547	0.0368421	4.72711	0.241892	197.134	2.16447	277.718	14.2111	80.5841	4.54579
5	rice	urea	150	surface	none	83.8	379.2	360	7.9	19.2	2.4	3.35547	0.0368421	5.73481	0.319304	197.134	2.16447	336.92	18.7591	139.786	5.97152
5	rice	urea	225	surface	none	83.8	379.2	360	7.9	19.2	2.4	3.35547	0.0368421	4.81204	0.181343	197.134	2.16447	282.707	10.6539	85.5735	3.43788
5	rice	urea	300	surface	none	83.8	379.2	360	7.9	19.2	2.4	3.35547	0.0368421	5.07643	0.306538	197.134	2.16447	298.24	18.0091	101.107	5.73597
5	rice	none	0	none	none	84.8	229.4	360	7.9	19.2	2.4	1.38077	0.0130178	1.38077	0.0424852	81.1202	0.764793	81.1202	2.49601	0	0.825527
5	rice	urea	75	surface	none	84.8	229.4	360	7.9	19.2	2.4	1.38077	0.0130178	5.41947	0.208299	81.1202	0.764793	318.394	12.2376	237.274	3.87741
5	rice	urea	150	surface	none	84.8	229.4	360	7.9	19.2	2.4	1.38077	0.0130178	5.71078	0.246127	81.1202	0.764793	335.509	14.4599	254.388	4.57903
5	rice	urea	225	surface	none	84.8	229.4	360	7.9	19.2	2.4	1.38077	0.0130178	6.32592	0.358	81.1202	0.764793	371.648	21.0325	290.527	6.65546
5	rice	urea	300	surface	none	84.8	229.4	360	7.9	19.2	2.4	1.38077	0.0130178	5.64342	0.25085	81.1202	0.764793	331.551	14.7374	250.431	4.66666
78	rice	none	0	none	none	88.6	323.5	306	7.2	15.6	1.2	0.0381679	0.000877193	0.0381679	0.00175439	2.24237	0.0515351	2.24237	0.10307	0	0.0364408
78	rice	urea	75	surface	none	88.6	323.5	306	7.2	15.6	1.2	0.0381679	0.000877193	2.66822	0.106894	2.24237	0.0515351	156.758	6.28005	154.515	1.98599
78	rice	urea	75	surface	none	84.9	304.3	306	7.2	15.6	1.2	0.0381679	0.000877193	1.31334	0.0527711	2.24237	0.0515351	77.1589	3.1003	74.9166	0.980537
78	rice	urea	75	surface	none	84.9	304.3	306	7.2	15.6	1.2	0.0381679	0.000877193	1.75841	0.0657143	2.24237	0.0515351	103.307	3.86071	101.064	1.22097
78	rice	urea	150	surface	none	88.6	323.5	306	7.2	15.6	1.2	0.0381679	0.000877193	2.31215	0.11625	2.24237	0.0515351	135.839	6.82969	133.597	2.1598
78	rice	urea	150	surface	none	88.6	323.5	306	7.2	15.6	1.2	0.0381679	0.000877193	1.2112	0.0513978	2.24237	0.0515351	71.158	3.01962	68.9156	0.955028
78	rice	urea	150	surface	none	84.9	304.3	306	7.2	15.6	1.2	0.0381679	0.000877193	1.67016	0.0638	2.24237	0.0515351	98.1217	3.74825	95.8794	1.18541
48	rice	none	0	none	none	88.7	623.5	300	6.8	11.4	0.7	1.56593	0.0414634	1.56593	0.0695122	91.9986	2.43598	91.9986	4.08384	0	1.50372
48	rice	urea	150	subsurface	none	88.7	623.5	300	6.8	11.4	0.7	1.56593	0.0414634	2.93094	0.143378	91.9986	2.43598	172.193	8.42348	80.1941	2.77289
48	rice	urea	150	subsurface	none	88.7	623.5	300	6.8	11.4	0.7	1.56593	0.0414634	2.19811	0.0976647	91.9986	2.43598	129.139	5.7378	37.1405	1.9712
48	rice	urea	150	subsurface	none	88.7	623.5	300	6.8	11.4	0.7	1.56593	0.0414634	1.82143	0.0866038	91.9986	2.43598	107.009	5.08797	15.0103	1.78386
48	rice	urea	150	subsurface	none	88.7	623.5	300	6.8	11.4	0.7	1.56593	0.0414634	2.71742	0.133851	91.9986	2.43598	159.648	7.86377	67.6499	2.60332
48	rice	urea	150	subsurface	none	88.7	623.5	300	6.8	11.4	0.7	1.56593	0.0414634	2.15168	0.100818	91.9986	2.43598	126.411	5.92303	34.4124	2.02525
48	rice	urea	150	subsurface	none	88.7	623.5	300	6.8	11.4	0.7	1.56593	0.0414634	1.71842	0.0859211	91.9986	2.43598	100.957	5.04786	8.95861	1.77242
48	rice	urea	150	subsurface	none	88.8	619.7	300	6.8	11.4	0.7	1.56593	0.0414634	2.77975	0.16256	91.9986	2.43598	163.311	9.5504	71.3119	3.1168
48	rice	urea	150	subsurface	none	88.8	619.7	300	6.8	11.4	0.7	1.56593	0.0414634	2.00666	0.102517	91.9986	2.43598	117.891	6.02287	25.8925	2.05448
48	rice	urea	150	subsurface	none	88.8	619.7	300	6.8	11.4	0.7	1.56593	0.0414634	1.6801	0.0812579	91.9986	2.43598	98.7061	4.7739	6.70749	1.69482
48	rice	urea	150	subsurface	none	88.8	619.7	300	6.8	11.4	0.7	1.56593	0.0414634	2.63288	0.126447	91.9986	2.43598	154.682	7.42878	62.6829	2.47226
48	rice	urea	150	subsurface	none	88.8	619.7	300	6.8	11.4	0.7	1.56593	0.0414634	2.03738	0.113881	91.9986	2.43598	119.696	6.69049	27.6976	2.25159
48	rice	urea	150	subsurface	none	88.8	619.7	300	6.8	11.4	0.7	1.56593	0.0414634	1.5655	0.0821088	91.9986	2.43598	91.9731	4.82389	0.0255395	1.70892
80	rice	none	0	none	none	90.2	459.5	176	7.8	13.7	1.2	0.319106	0.00967742	0.319106	0.0126613	18.7475	0.568548	18.7475	0.743851	0	0.296068
80	rice	urea	180	surface	none	90.2	459.5	176	7.8	13.7	1.2	0.319106	0.00967742	1.08859	0.0564151	18.7475	0.568548	63.9548	3.31439	45.2073	1.06341
80	rice	urea	180	surface	inhibitor	86.5	488.5	176	7.8	13.7	1.2	0.319106	0.00967742	0.728381	0.0462676	18.7475	0.568548	42.7924	2.71822	24.0449	0.878179
80	rice	urea	180	surface	inhibitor	84.2	320.8	176	7.8	13.7	1.2	0.319106	0.00967742	0.71	0.0446853	18.7475	0.568548	41.7125	2.62526	22.965	0.849426
80	rice	urea	180	surface	inhibitor	87.9	597.5	176	7.8	13.7	1.2	0.319106	0.00967742	0.83802	0.0547794	18.7475	0.568548	49.2337	3.21829	30.4862	1.03347
80	rice	urea	180	surface	inhibitor	87.1	322.7	176	7.8	13.7	1.2	0.319106	0.00967742	1.23068	0.0756115	18.7475	0.568548	72.3024	4.44218	53.5549	1.4162
80	rice	urea	180	surface	inhibitor	87.1	505.7	176	7.8	13.7	1.2	0.319106	0.00967742	0.679515	0.0447101	18.7475	0.568548	39.9215	2.62672	21.1741	0.849877
80	rice	urea	180	surface	inhibitor	89.5	550.7	176	7.8	13.7	1.2	0.319106	0.00967742	0.497872	0.0329577	18.7475	0.568548	29.25	1.93627	10.5025	0.638152
80	rice	IU	180	surface	none	88	198.1	176	7.8	13.7	1.2	0.319106	0.00967742	0.5	0.0325874	18.7475	0.568548	29.375	1.91451	10.6275	0.631553
80	rice	IU	180	surface	none	88.9	271.8	176	7.8	13.7	1.2	0.301923	0.0115385	0.482143	0.0441346	17.738	0.677885	28.3259	2.59291	10.5879	0.847508
81	rice	none	0	none	none	95.3	429.2	311	7.3	13.8	1.6	0.0576923	0.00576923	0.0576923	0.00227273	3.38942	0.338942	3.38942	0.133523	0	0.1152
81	rice	urea	160	surface	none	95.3	429.2	311	7.3	13.8	1.6	0.0576923	0.00576923	1.08365	0.0647727	3.38942	0.338942	63.6644	3.8054	60.275	1.20814
81	rice	urea	160	surface	none	95.3	429.2	311	7.3	13.8	1.6	0.0576923	0.00576923	0.909877	0.05896	3.38942	0.338942	53.4552	3.4639	50.0658	1.10061
81	rice	urea	160	surface	none	95.3	429.2	311	7.3	13.8	1.6	0.0576923	0.00576923	6.33889	0.290701	3.38942	0.338942	372.41	17.0787	369.02	5.40181
81	rice	urea	160	surface	none	95.3	429.2	311	7.3	13.8	1.6	0.0576923	0.00576923	5.65527	0.250545	3.38942	0.338942	332.247	14.7195	328.857	4.65596
149	rice(2013)	none	0	none	none	109.4	397.5	371	5.4	18.1	1.2	0.264645	0.0165049	0.264645	0.01	15.5479	0.96966	15.5479	0.5875	0	0.358524
149	rice(2013)	none	0	surface	mulch	109.4	397.5	371	5.4	18.1	1.2	0.264645	0.0165049	0.243902	0.00827586	15.5479	0.96966	14.3293	0.486207	1.21865	0.343022
149	rice(2013)	urea	160	surface	none	109.4	397.5	371	5.4	18.1	1.2	0.264645	0.0165049	2.04032	0.0766667	15.5479	0.96966	119.869	4.50417	104.321	1.45697
149	rice(2013)	urea	160	surface	mulch	109.4	397.5	371	5.4	18.1	1.2	0.264645	0.0165049	1.8368	0.09904	15.5479	0.96966	107.912	5.8186	92.3638	1.86538
7	rice	none	0	none	none	77.8	708.1	530	7.5	80	4.5	0.21875	0.00676692	0.21875	0.00842105	12.8516	0.397556	12.8516	0.494737	0	0.200703
7	rice	urea	135	subsurface	none	77.8	708.1	530	7.5	80	4.5	0.21875	0.00676692	3.48754	0.106114	12.8516	0.397556	204.893	6.23418	192.041	1.97543
7	rice	urea	180	subsurface	none	77.8	708.1	530	7.5	80	4.5	0.21875	0.00676692	4.24017	0.140419	12.8516	0.397556	249.11	8.24959	236.258	2.61178
7	rice	urea	225	subsurface	none	77.8	708.1	530	7.5	80	4.5	0.21875	0.00676692	4.48118	0.225385	12.8516	0.397556	263.269	13.2413	250.418	4.18917
7	rice	urea	270	subsurface	none	77.8	708.1	530	7.5	80	4.5	0.21875	0.00676692	5.24176	0.272571	12.8516	0.397556	307.953	16.0136	295.102	5.0655
7	rice	urea	380	subsurface	none	77.8	708.1	530	7.5	80	4.5	0.21875	0.00676692	6.5049	0.340256	12.8516	0.397556	382.163	19.9901	369.311	6.32266
89	paddy (rice)	none	0	none	none	77.8	708.1	149	7.5	80	4.5	0.173737	0.00403226	0.173737	0.00693548	10.2071	0.236895	10.2071	0.40746	0	0.149045
89	paddy (rice)	urea	180	surface	none	77.8	708.1	149	7.5	80	4.5	0.173737	0.00403226	2.16028	0.0934356	10.2071	0.236895	126.917	5.48934	116.71	1.7375
89	paddy (rice)	urea	90	surface	none	77.8	708.1	149	7.5	80	4.5	0.173737	0.00403226	3.79676	0.137974	10.2071	0.236895	223.06	8.10596	212.853	2.56443
89	paddy (rice)	urea	180	surface	none	77.8	708.1	149	7.5	80	4.5	0.173737	0.00403226	4.33772	0.176607	10.2071	0.236895	254.841	10.3757	244.634	3.28193
89	paddy (rice)	urea	270	surface	none	77.8	708.1	149	7.5	80	4.5	0.173737	0.00403226	4.11333	0.219053	10.2071	0.236895	241.658	12.8694	231.451	4.07034
89	paddy (rice)	urea	360	surface	none	77.8	708.1	149	7.5	80	4.5	0.173737	0.00403226	5.7881	0.262796	10.2071	0.236895	340.051	15.4393	329.844	4.8829
90	paddy (rice)	none	0	none	none	82.9	1026.9	106	5	26.5	1.4	0.160396	0.00340136	0.160396	0.0055102	9.42327	0.19983	9.42327	0.323724	0	0.120304
90	paddy (rice)	none	185	surface	none	82.9	1026.9	106	5	26.5	1.4	0.160396	0.00340136	6.25535	0.237027	9.42327	0.19983	367.502	13.9253	358.079	4.40403
90	paddy (rice)	OA	185	surface	none	82.9	1026.9	106	5	26.5	1.4	0.160396	0.00340136	4.45884	0.197635	9.42327	0.19983	261.957	11.6111	252.534	3.67228
90	paddy (rice)	OA	185	surface	none	82.9	1026.9	106	5	26.5	1.4	0.160396	0.00340136	3.65727	0.156013	9.42327	0.19983	214.865	9.16574	205.441	2.89915
90	paddy (rice)	OA	185	surface	none	82.9	1026.9	106	5	26.5	1.4	0.160396	0.00340136	6.04463	0.216391	9.42327	0.19983	355.122	12.7129	345.699	4.02068
8	ealry rice	none	0	none	none	106.1	1391.4	333	6	41.3	1.6	1.3549	0.004	1.3549	0.0632	79.6002	0.235	79.6002	3.713	0	1.1765
8	ealry rice	urea	180	subsurface	none	106.1	1391.4	333	6	41.3	1.6	1.3549	0.0672	2.28134	0.0982143	79.6002	3.948	134.029	5.77009	54.4287	2.2109
8	ealry rice	urea	150	subsurface	none	106.1	1391.4	333	6	41.3	1.6	1.3549	0.0672	6.53138	0.267262	79.6002	3.948	383.719	15.7016	304.119	5.11984
8	ealry rice	urea	150	subsurface	none	106.1	1391.4	333	6	41.3	1.6	1.3549	0.0672	5.23711	0.223313	79.6002	3.948	307.68	13.1196	228.08	4.33257
8	late rice	none	0	none	none	106.1	1391.4	333	6	41.3	1.6	1.57367	0.0756757	1.7908	0.080991	92.4533	4.44595	105.21	4.75822	12.7562	2.0593
8	late rice	urea	210	subsurface	none	106.1	1391.4	333	6	41.3	1.6	1.57367	0.0756757	5.26678	0.175124	92.4533	4.44595	309.423	10.2886	216.97	3.5443
8	late rice	urea	180	subsurface	none	106.1	1391.4	333	6	41.3	1.6	1.57367	0.0756757	6.88583	0.349624	92.4533	4.44595	404.542	20.5404	312.089	6.64586
8	late rice	urea	180	subsurface	none	106.1	1391.4	333	6	41.3	1.6	1.57367	0.0756757	5.38283	0.257724	92.4533	4.44595	316.241	15.1413	223.788	4.99023
57	rice	none	0	none	none	96.9	606.5	140	7.3	8.2	0.5	0.408696	0.00816	0.408696	0.0188	24.0109	0.4794	24.0109	1.1045	0	0.380755
57	rice	urea	100	subsurface	none	96.9	606.5	140	7.3	8.2	0.5	0.408696	0.00816	1.83942	0.0802548	24.0109	0.4794	108.066	4.71497	84.0548	1.49869
57	rice	urea	200	subsurface	none	96.9	606.5	140	7.3	8.2	0.5	0.408696	0.00816	4.3872	0.207229	24.0109	0.4794	257.748	12.1747	233.737	3.85296
57	rice	urea	300	subsurface	none	96.9	606.5	140	7.3	8.2	0.5	0.408696	0.00816	7.45122	0.311735	24.0109	0.4794	437.759	18.3144	413.748	5.79351
57	rice	IU	100	surface	none	96.9	606.5	140	7.3	8.2	0.5	0.713043	0.00816	0.595065	0.0244048	41.8913	0.4794	34.9601	1.43378	6.93122	0.478074
57	rice	IU	200	surface	none	96.9	606.5	140	7.3	8.2	0.5	0.713043	0.00816	0.751033	0.0379747	41.8913	0.4794	44.1232	2.23101	2.23187	0.721612
57	rice	IU	300	surface	none	96.9	606.5	140	7.3	8.2	0.5	0.713043	0.00816	0.993965	0.0535032	41.8913	0.4794	58.3955	3.14331	16.5042	1.0055
57	rice	none	0	none	none	98.2	341.5	140	7.3	8.2	0.5	0.373665	0.00671642	0.373665	0.0156716	21.9528	0.39459	21.9528	0.920709	0	0.316766
57	rice	urea	100	subsurface	none	98.2	341.5	140	7.3	8.2	0.5	0.373665	0.00671642	1.97299	0.0730337	21.9528	0.39459	115.913	4.29073	93.96	1.36257
57	rice	urea	200	subsurface	none	98.2	341.5	140	7.3	8.2	0.5	0.373665	0.00671642	5.27553	0.218378	21.9528	0.39459	309.937	12.8297	287.984	4.05904
57	rice	urea	300	subsurface	none	98.2	341.5	140	7.3	8.2	0.5	0.373665	0.00671642	9.03743	0.370256	21.9528	0.39459	530.949	21.7526	508.996	6.8799
57	rice	IU	100	surface	none	98.2	341.5	140	7.3	8.2	0.5	0.373665	0.00671642	0.520394	0.0226994	21.9528	0.39459	30.5731	1.33359	8.62029	0.439791
57	rice	IU	200	surface	none	98.2	341.5	140	7.3	8.2	0.5	0.373665	0.00671642	0.543881	0.0325926	21.9528	0.39459	31.953	1.91481	10.0002	0.618241
57	rice	IU	300	surface	none	98.2	341.5	140	7.3	8.2	0.5	0.373665	0.00671642	0.926366	0.0445714	21.9528	0.39459	54.424	2.61857	32.4711	0.837414
17	rice	none	0	none	none	101.4	521.4	108	5.2	20.2	1.6	0.642066	0.0145161	0.642066	0.0280645	37.7214	0.852823	37.7214	1.64879	0	0.587011
17	rice	urea	180	surface	none	101.4	521.4	108	5.2	20.2	1.6	0.642066	0.0145161	7.8939	0.234331	37.7214	0.852823	463.767	13.7669	426.045	4.36183
17	rice	UOCF	180	subsurface	none	101.4	521.4	108	5.2	20.2	1.6	0.642066	0.0145161	6.08056	0.194082	37.7214	0.852823	357.233	11.4023	319.512	3.61579
17	rice	UOCF	180	subsurface	none	101.4	521.4	108	5.2	20.2	1.6	0.642066	0.0145161	4.84691	0.138239	37.7214	0.852823	284.756	8.12157	247.035	2.58239
17	rice	UOCF	180	subsurface	none	101.4	521.4	108	5.2	20.2	1.6	0.642066	0.0145161	3.88599	0.138644	37.7214	0.852823	228.302	8.14534	190.58	2.58986
17	rice	UOCF	180	surface	none	101.8	418.8	108	5.2	20.2	1.6	0.642066	0.0145161	8.69163	0.330459	37.7214	0.852823	510.633	19.4145	472.912	6.14532
17	rice	UOCF	180	subsurface	none	101.8	418.8	108	5.2	20.2	1.6	0.642066	0.0145161	7.17318	0.316609	37.7214	0.852823	421.424	18.6008	383.703	5.88827
17	rice	UOCF	180	subsurface	none	101.8	418.8	108	5.2	20.2	1.6	0.642066	0.0145161	5.98344	0.233682	37.7214	0.852823	351.527	13.7288	313.806	4.34979
17	rice	UOCF	180	subsurface	none	101.8	418.8	108	5.2	20.2	1.6	0.642066	0.0145161	4.72351	0.180372	37.7214	0.852823	277.506	10.5969	239.785	3.36186
18	early rice	none	0	none	none	87.4	386.1	95	4.9	32.93	1.4	0.772187	0.0260163	0.772187	0.0343089	45.366	1.52846	45.366	2.01565	0	0.799939
18	early rice	urea	165	surface	none	87.4	386.1	95	4.9	32.93	1.4	0.772187	0.0260163	1.73146	0.0661224	45.366	1.52846	101.723	3.88469	56.3575	1.32011
18	early rice	urea	165	surface	none	87.4	386.1	95	4.9	32.93	1.4	0.772187	0.0260163	1.81179	0.0858974	45.366	1.52846	106.443	5.04647	61.0767	1.66743
18	early rice	IU	165	surface	none	87.4	386.1	95	4.9	32.93	1.4	0.772187	0.0260163	0.952262	0.0361137	45.366	1.52846	55.9454	2.12168	10.5794	0.826905
18	early rice	IU	165	surface	none	87.4	386.1	95	4.9	32.93	1.4	0.772187	0.0260163	0.871605	0.0235333	45.366	1.52846	51.2068	1.38258	5.84082	0.651745
18	early rice	IU	165	surface	none	87.4	386.1	95	4.9	32.93	1.4	0.772187	0.0260163	1.23425	0.0411017	45.366	1.52846	72.5124	2.41472	27.1464	0.903718
18	early rice	none	0	none	none	90.2	300.8	95	4.9	32.93	1.4	1.03915	0.0200935	1.03915	0.0272897	61.0498	1.18049	61.0498	1.60327	0	0.629606
18	early rice	urea	165	surface	none	90.2	300.8	95	4.9	32.93	1.4	1.03915	0.0200935	2.05663	0.0692558	61.0498	1.18049	120.827	4.06878	59.7772	1.33972
18	early rice	urea	165	surface	none	90.2	300.8	95	4.9	32.93	1.4	1.03915	0.0200935	1.98042	0.0564143	61.0498	1.18049	116.35	3.31434	55.2998	1.11258
18	early rice	IU	165	surface	none	90.2	300.8	95	4.9	32.93	1.4	1.03915	0.0200935	0.995	0.0323577	61.0498	1.18049	58.4562	1.90102	2.59357	0.707631
18	early rice	IU	165	surface	none	90.2	300.8	95	4.9	32.93	1.4	1.03915	0.0200935	0.808948	0.0264681	61.0498	1.18049	47.5257	1.555	13.5241	0.61738
18	early rice	IU	165	surface	none	90.2	300.8	95	4.9	32.93	1.4	1.03915	0.0200935	1.48993	0.0405109	61.0498	1.18049	87.5336	2.38002	26.4837	0.840122
19	early rice (2014)	none	0	none	none	92.6	441.5	125	6.4	43.6	1.4	0.651685	0.0113208	0.651685	0.0137549	38.2865	0.665094	38.2865	0.808103	0	0.330965
19	early rice (2014)	urea	195	subsurface	none	92.6	441.5	125	6.4	43.6	1.4	0.651685	0.0113208	2.4356	0.08125	38.2865	0.665094	143.091	4.77344	104.805	1.52408
19	early rice (2014)	IU	195	surface	none	92.6	441.5	125	6.4	43.6	1.4	0.651685	0.0113208	0.711864	0.0261411	38.2865	0.665094	41.822	1.53579	3.53552	0.529244
19	early rice (2014)	IU	195	surface	none	92.6	441.5	125	6.4	43.6	1.4	0.651685	0.0113208	2.18497	0.0887324	38.2865	0.665094	128.367	5.21303	90.0805	1.66187
19	early rice (2014)	IU	195	subsurface	none	92.6	441.5	125	6.4	43.6	1.4	0.651685	0.0113208	2.18859	0.087037	38.2865	0.665094	128.58	5.11343	90.2932	1.63063
19	late rice (2014)	urea	195	subsurface	none	68.4	399.7	125	6.4	43.6	1.4	0.651685	0.0113208	2.94335	0.118905	38.2865	0.665094	172.922	6.9857	134.635	2.21906
19	late rice (2014)	IU	195	surface	none	68.4	399.7	125	6.4	43.6	1.4	0.651685	0.0113208	1.0514	0.0676692	38.2865	0.665094	61.7699	3.97556	23.4833	1.27466
19	late rice (2014)	IU	195	surface	none	68.4	399.7	125	6.4	43.6	1.4	0.651685	0.0113208	3.9116	0.2648	38.2865	0.665094	229.807	15.557	191.52	4.92405
19	late rice (2014)	IU	195	subsurface	none	68.4	399.7	125	6.4	43.6	1.4	0.651685	0.0113208	2.48521	0.115385	38.2865	0.665094	146.006	6.77885	107.719	2.15395
19	early rice (2015)	urea	195	subsurface	none	95.6	520.8	125	6.4	43.6	1.4	0.651685	0.0113208	2.63855	0.134356	38.2865	0.665094	155.015	7.8934	116.729	2.50496
19	early rice (2015)	IU	195	surface	none	95.6	520.8	125	6.4	43.6	1.4	0.651685	0.0113208	0.727273	0.0435374	38.2865	0.665094	42.7273	2.55782	4.44076	0.835752
19	early rice (2015)	IU	195	surface	none	95.6	520.8	125	6.4	43.6	1.4	0.651685	0.0113208	2.90683	0.14717	38.2865	0.665094	170.776	8.64623	132.49	2.74225
19	early rice (2015)	IU	195	subsurface	none	95.6	520.8	125	6.4	43.6	1.4	0.651685	0.0113208	2.56158	0.135065	38.2865	0.665094	150.493	7.93506	112.206	2.51809
19	late rice (2015)	urea	195	subsurface	none	68.2	322.9	125	6.4	43.6	1.4	0.651685	0.0113208	2.8777	0.162759	38.2865	0.665094	169.065	9.56207	130.778	3.0311
19	late rice (2015)	IU	195	surface	none	68.2	322.9	125	6.4	43.6	1.4	0.651685	0.0113208	1.18343	0.08	38.2865	0.665094	69.5266	4.7	31.2401	1.50108
19	late rice (2015)	IU	195	surface	none	68.2	322.9	125	6.4	43.6	1.4	0.651685	0.0113208	3.76794	0.189759	38.2865	0.665094	221.367	11.1483	183.08	3.53168
19	late rice (2015)	IU	195	subsurface	none	68.2	322.9	125	6.4	43.6	1.4	0.651685	0.0113208	2.7954	0.150633	38.2865	0.665094	164.23	8.84968	125.943	2.80641
20	Middle-season rice (2013)	none	0	none	none	110.2	916.6	112	5.2	41.5	2.4	0.271084	0.00676692	0.271084	0.0101504	15.9262	0.397556	15.9262	0.596335	0	0.226642
20	Middle-season rice (2013)	UOCF	285	surface	none	110.2	916.6	112	5.2	41.5	2.4	0.271084	0.00676692	4.3125	0.24497	15.9262	0.397556	253.359	14.392	237.433	4.55289
20	Middle-season rice (2013)	OCFOA	180	subsurface	none	110.2	916.6	112	5.2	41.5	2.4	0.271084	0.00676692	2.49527	0.129448	15.9262	0.397556	146.597	7.60506	130.671	2.40822
20	Middle-season rice (2013)	UOCFOA	285	surface	none	110.2	916.6	112	5.2	41.5	2.4	0.271084	0.00676692	3.34653	0.229932	15.9262	0.397556	196.609	13.5085	180.683	4.27361
20	Middle-season rice (2013)	UIU	285	surface	none	110.2	916.6	112	5.2	41.5	2.4	0.271084	0.00676692	2.11538	0.14966	15.9262	0.397556	124.279	8.79252	108.353	2.78328
20	Middle-season rice (2014)	none	0	none	none	102.8	761.2	112	5.2	41.5	2.4	0.360784	0.00774194	0.360784	0.011871	21.1961	0.454839	21.1961	0.697419	0	0.263301
20	Middle-season rice (2014)	UOCF	285	surface	none	102.8	761.2	112	5.2	41.5	2.4	0.360784	0.00774194	5.47771	0.165385	21.1961	0.454839	321.815	9.71635	300.619	3.07594
20	Middle-season rice (2014)	OCFOA	180	subsurface	none	102.8	761.2	112	5.2	41.5	2.4	0.360784	0.00774194	4.25091	0.112219	21.1961	0.454839	249.741	6.59285	228.545	2.0898
20	Middle-season rice (2014)	UOCFOA	285	surface	none	102.8	761.2	112	5.2	41.5	2.4	0.360784	0.00774194	4.51042	0.119613	21.1961	0.454839	264.987	7.02728	243.791	2.22687
20	Middle-season rice (2014)	UIU	285	surface	none	102.8	761.2	112	5.2	41.5	2.4	0.360784	0.00774194	3.93837	0.111884	21.1961	0.454839	231.379	6.57319	210.183	2.0836
21	rice	none	0	none	none	112.4	483.2	100	6.5	27.9	2	0.210309	0.0064	0.210309	0.00816	12.3557	0.376	12.3557	0.4794	0	0.192666
21	rice	urea	50	surface	none	112.4	483.2	100	6.5	27.9	2	0.210309	0.0064	1.14643	0.0422368	12.3557	0.376	67.3527	2.48141	54.997	0.793649
21	rice	urea	100	surface	none	112.4	483.2	100	6.5	27.9	2	0.210309	0.0064	2.51935	0.106259	12.3557	0.376	148.012	6.24269	135.656	1.97769
21	rice	urea	50	surface	inhibitor	108.7	378.4	100	6.5	27.9	2	0.210309	0.0064	0.362295	0.0103271	12.3557	0.376	21.2848	0.606717	8.92917	0.225717
21	rice	urea	100	surface	inhibitor	108.7	378.4	100	6.5	27.9	2	0.210309	0.0064	0.689394	0.0179134	12.3557	0.376	40.5019	1.05241	28.1462	0.353404
21	rice	OCF	50	surface	none	112.4	483.2	100	6.5	27.9	2	0.210309	0.0064	0.245455	0.00630841	12.3557	0.376	14.4205	0.370619	2.06478	0.166953
21	rice	OCF	100	surface	none	108.7	378.4	100	6.5	27.9	2	0.210309	0.0064	0.475	0.0215909	12.3557	0.376	27.9062	1.26847	15.5506	0.418376
114	paddy (rice)	none	0	none	none	102.2	432.2	314	5.2	42.3	2.4	0.692031	0.0218085	0.692031	0.0193117	40.6568	1.28125	40.6568	1.13456	0	0.541187
114	paddy (rice)	urea	180	subsurface	none	102.2	432.2	314	5.2	42.3	2.4	0.692031	0.0218085	3.29093	0.130734	40.6568	1.28125	193.342	7.6806	152.685	2.46238
114	paddy (rice)	IU	180	subsurface	none	102.2	432.2	314	5.2	42.3	2.4	0.692031	0.0218085	2.58982	0.0817966	40.6568	1.28125	152.152	4.80555	111.495	1.57273
114	paddy (rice)	UOA	180	subsurface	none	102.2	432.2	314	5.2	42.3	2.4	0.692031	0.0218085	2.95851	0.143814	40.6568	1.28125	173.812	8.44905	133.155	2.70237
114	paddy (rice)	none	0	none	none	102.2	432.2	314	5.2	42.3	2.4	1.40698	0.0293617	1.40698	0.0500851	82.6598	1.725	82.6598	2.9425	0	1.07861
114	paddy (rice)	urea	180	subsurface	none	102.2	432.2	314	5.2	42.3	2.4	1.40698	0.0293617	2.67053	0.0897971	82.6598	1.725	156.894	5.27558	74.2337	1.7552
114	paddy (rice)	IU	180	subsurface	none	102.2	432.2	314	5.2	42.3	2.4	1.40698	0.0293617	2.05427	0.0658769	82.6598	1.725	120.688	3.87027	38.0285	1.33995
114	paddy (rice)	UOA	180	subsurface	none	102.2	432.2	314	5.2	42.3	2.4	1.40698	0.0293617	2.63418	0.0795402	82.6598	1.725	154.758	4.67299	72.0984	1.5752
113	paddy (rice)	none	0	none	none	108	577	176	5.2	44.2	2.4	0.609966	0.020339	0.609966	0.0601695	35.8355	1.19492	35.8355	3.53496	0	1.17999
113	paddy (rice)	UOCF	150	subsurface	none	108	577	176	5.2	44.2	2.4	0.609966	0.020339	1.28927	0.0473444	35.8355	1.19492	75.7444	2.78148	39.9089	0.957313
113	paddy (rice)	UOCF	150	subsurface	none	108	577	176	5.2	44.2	2.4	0.609966	0.020339	1.57889	0.109758	35.8355	1.19492	92.7596	6.44829	56.9241	2.07384
113	paddy (rice)	UOCF	150	subsurface	none	108	577	176	5.2	44.2	2.4	0.609966	0.020339	2.0116	0.100592	35.8355	1.19492	118.181	5.90976	82.3458	1.90665
113	paddy (rice)	UOCF	150	subsurface	none	108	577	176	5.2	44.2	2.4	0.609966	0.020339	2.45066	0.0650804	35.8355	1.19492	143.976	3.82347	108.141	1.26676
113	paddy (rice)	UOCF	150	subsurface	none	108	577	176	5.2	44.2	2.4	0.609966	0.020339	2.21179	0.0717969	35.8355	1.19492	129.943	4.21807	94.1074	1.38636
113	paddy (rice)	UOCF	150	subsurface	none	108	577	176	5.2	44.2	2.4	0.609966	0.020339	2.35499	0.0602154	35.8355	1.19492	138.356	3.53765	102.52	1.1808
113	paddy (rice)	UOCF	150	subsurface	none	108	577	176	5.2	44.2	2.4	0.609966	0.020339	3.29506	0.10187	35.8355	1.19492	193.585	5.98488	157.749	1.92994
113	paddy (rice)	UOCF	150	subsurface	none	108	577	176	5.2	44.2	2.4	0.609966	0.020339	4.28946	0.145424	35.8355	1.19492	252.006	8.54364	216.171	2.72803
113	paddy (rice)	UOCF	150	subsurface	none	103.3	598.7	176	5.2	44.2	2.4	0.609966	0.020339	5.63822	0.325441	35.8355	1.19492	331.245	19.1197	295.41	6.05797
113	paddy (rice)	UOCF	150	subsurface	none	103.3	598.7	176	5.2	44.2	2.4	0.609966	0.020339	6.18016	0.1578	35.8355	1.19492	363.084	9.27075	327.249	2.95592
113	paddy (rice)	UOCF	150	subsurface	none	103.3	598.7	176	5.2	44.2	2.4	0.609966	0.020339	6.42745	0.186958	35.8355	1.19492	377.613	10.9838	341.777	3.49387
113	paddy (rice)	UOCF	150	subsurface	none	103.3	598.7	176	5.2	44.2	2.4	0.609966	0.020339	6.06686	0.172714	35.8355	1.19492	356.428	10.1469	320.592	3.23091
113	paddy (rice)	UOCF	150	subsurface	none	103.3	598.7	176	5.2	44.2	2.4	0.609966	0.020339	6.80397	0.199109	35.8355	1.19492	399.733	11.6976	363.898	3.71836
113	paddy (rice)	UOCF	150	subsurface	none	103.3	598.7	176	5.2	44.2	2.4	0.609966	0.020339	7.97703	0.240939	35.8355	1.19492	468.65	14.1552	432.815	4.49217
113	paddy (rice)	UOCF	150	subsurface	none	103.3	598.7	176	5.2	44.2	2.4	0.609966	0.020339	8.63662	0.259831	35.8355	1.19492	507.401	15.265	471.566	4.842
113	paddy (rice)	UOCF	150	subsurface	none	103.3	598.7	176	5.2	44.2	2.4	0.609966	0.020339	13.974	0.786179	35.8355	1.19492	820.972	46.188	785.136	14.6108
119	rice	none	0	none	none	106.3	533.5	565	28.25	7.15	2.13	3.62645	0.0787879	3.62645	0.113409	213.054	4.62879	213.054	6.66278	0	2.56551
119	rice	urea	180	subsurface	none	106.3	533.5	565	28.25	7.15	2.13	3.62645	0.0787879	7.03641	0.308657	213.054	4.62879	413.389	18.1336	200.335	5.91821
119	rice	urea + Controlled release fertilizer	180	subsurface	none	106.3	533.5	565	28.25	7.15	2.13	3.62645	0.0787879	4.84792	0.30207	213.054	4.62879	284.815	17.7466	71.7611	5.79972
119	rice	new urea	180	subsurface	none	106.3	533.5	565	28.25	7.15	2.13	3.62645	0.0787879	5.00757	0.247701	213.054	4.62879	294.195	14.5524	81.1405	4.82906
119	rice	none	0	none	none	106.3	533.5	565	28.25	7.15	2.13	3.05006	0.138667	3.05006	0.174667	179.191	8.14667	179.191	10.2617	0	4.14331
119	rice	urea	180	subsurface	none	106.3	533.5	565	28.25	7.15	2.13	3.05006	0.138667	9.12586	0.310362	179.191	8.14667	536.144	18.2338	356.953	6.31536
119	rice	urea + Controlled release fertilizer	180	subsurface	none	106.3	533.5	565	28.25	7.15	2.13	3.05006	0.138667	3.63268	0.421647	179.191	8.14667	213.42	24.7718	34.2289	8.24626
119	rice	new urea	180	subsurface	none	106.3	533.5	565	28.25	7.15	2.13	3.05006	0.138667	6.66349	0.291528	179.191	8.14667	391.48	17.1273	212.289	5.99759
111	two-crop-paddy	none	0	none	none	102.2	676.3	236	5.6	12.5	1.2	0.822917	0.0428571	0.822917	0.0752381	48.3464	2.51786	48.3464	4.42024	0	1.60867
111	two-crop-paddy	urea	180	surface	none	102.2	676.3	236	5.6	12.5	1.2	0.822917	0.0428571	9.32479	0.752414	48.3464	2.51786	547.831	44.2043	499.485	14.0013
111	two-crop-paddy	IU	180	surface	none	102.2	676.3	236	5.6	12.5	1.2	0.822917	0.0428571	5.67176	0.488816	48.3464	2.51786	333.216	28.7179	284.869	9.11624
111	two-crop-paddy	IU	162	surface	none	102.2	676.3	236	5.6	12.5	1.2	0.822917	0.0428571	4.78986	0.391124	48.3464	2.51786	281.404	22.9786	233.058	7.30995
111	two-crop-paddy	IU	144	surface	none	102.2	676.3	236	5.6	12.5	1.2	0.822917	0.0428571	4.67442	0.443382	48.3464	2.51786	274.622	26.0487	226.276	8.27572
111	two-crop-paddy	IU	126	surface	none	102.2	676.3	236	5.6	12.5	1.2	0.822917	0.0428571	4.256	0.429032	48.3464	2.51786	250.04	25.2056	201.694	8.01039
52	early rice	none	0	none	none	100.1	935.1	595	6.8	19.8	1.4	0.5	0.0164706	0.5	0.03	29.375	0.967647	29.375	1.7625	0	0.635826
52	early rice	urea	75	subsurface	none	100.1	935.1	595	6.8	19.8	1.4	0.5	0.0164706	2.05882	0.104132	29.375	0.967647	120.956	6.11777	91.5809	1.95866
52	early rice	urea	150	subsurface	none	100.1	935.1	595	6.8	19.8	1.4	0.5	0.0164706	6.06173	0.244279	29.375	0.967647	356.127	14.3514	326.752	4.54861
52	early rice	IU	75	subsurface	none	100.1	935.1	595	6.8	19.8	1.4	0.5	0.0164706	0.424886	0.027451	29.375	0.967647	24.9621	1.61275	4.41294	0.594751
52	early rice	IU	150	subsurface	none	100.1	935.1	595	6.8	19.8	1.4	0.5	0.0164706	2.42857	0.2	29.375	0.967647	142.679	11.75	113.304	3.72825
52	early rice	none	0	none	none	100.1	935.1	595	6.8	19.8	1.4	0.466	0.0127273	0.466	0.0211818	27.3775	0.747727	27.3775	1.24443	0	0.459098
52	early rice	urea	75	surface	none	100.1	935.1	595	6.8	19.8	1.4	0.466	0.0127273	1.792	0.0484848	27.3775	0.747727	105.28	2.84848	77.9025	0.931287
52	early rice	urea	150	surface	none	100.1	935.1	595	6.8	19.8	1.4	0.466	0.0127273	4.7619	0.190476	27.3775	0.747727	279.762	11.1905	252.384	3.54663
52	early rice	IU	75	surface	none	100.1	935.1	595	6.8	19.8	1.4	0.466	0.0127273	0.42735	0.024	27.3775	0.747727	25.1068	1.41	2.27066	0.504698
52	early rice	IU	150	surface	none	100.1	935.1	595	6.8	19.8	1.4	0.466	0.0127273	0.491991	0.0316176	27.3775	0.747727	28.9045	1.85754	1.52696	0.633209
52	late rice	none	0	none	none	98.5	524.9	595	6.8	19.8	1.4	0.5	0.00754717	0.5	0.0240566	29.375	0.443396	29.375	1.41333	0	0.468411
52	late rice	urea	75	surface	none	98.5	524.9	595	6.8	19.8	1.4	0.5	0.00754717	3.05842	0.121088	29.375	0.443396	179.682	7.11395	150.307	2.25399
52	late rice	urea	150	surface	none	98.5	524.9	595	6.8	19.8	1.4	0.5	0.00754717	5.12941	0.274214	29.375	0.443396	301.353	16.1101	271.978	5.09638
52	late rice	IU	75	surface	none	98.5	524.9	595	6.8	19.8	1.4	0.5	0.00754717	0.442857	0.025	29.375	0.443396	26.0179	1.46875	3.35714	0.485163
52	late rice	IU	150	surface	none	98.5	524.9	595	6.8	19.8	1.4	0.5	0.00754717	1.31361	0.078169	29.375	0.443396	77.1746	4.59243	47.7996	1.45901
52	late rice	none	0	none	none	98.5	524.9	595	6.8	19.8	1.4	0.296935	0.00707965	0.296935	0.0137168	17.4449	0.415929	17.4449	0.805863	0	0.286777
52	late rice	urea	75	surface	none	98.5	524.9	595	6.8	19.8	1.4	0.296935	0.00707965	2.27642	0.0897436	17.4449	0.415929	133.74	5.27244	116.295	1.67247
52	late rice	urea	150	surface	none	98.5	524.9	595	6.8	19.8	1.4	0.296935	0.00707965	4.6831	0.252532	17.4449	0.415929	275.132	14.8362	257.687	4.69347
52	late rice	IU	75	surface	none	98.5	524.9	595	6.8	19.8	1.4	0.296935	0.00707965	0.402778	0.0171598	17.4449	0.415929	23.6632	1.00814	6.21827	0.344867
52	late rice	IU	150	surface	none	98.5	524.9	595	6.8	19.8	1.4	0.296935	0.00707965	0.418605	0.0285714	17.4449	0.415929	24.593	1.67857	7.1481	0.546864
59	rice	none	0	none	none	108	577	584	5.8	27.6	1.6	0.448077	0.00956522	0.448077	0.0202609	26.3245	0.561957	26.3245	1.19033	0	0.416254
59	rice	urea	90	subsurface	none	108	577	584	5.8	27.6	1.6	0.448077	0.00956522	3.46202	0.154	26.3245	0.561957	203.393	9.0475	177.069	2.86658
59	rice	urea	90	subsurface	biochar	108	577	584	5.8	27.6	1.6	0.448077	0.00956522	3.87427	0.212	26.3245	0.561957	227.613	12.455	201.289	3.94262
59	rice	urea	90	subsurface	biochar	108	577	584	5.8	27.6	1.6	0.448077	0.00956522	4.47324	0.240606	26.3245	0.561957	262.803	14.1356	236.478	4.4736
116	paddy (rice)	none	0	none	none	98.5	729.5	202	7.9	10.6	0.6	0.786739	0.019375	0.786739	0.04175	46.2209	1.13828	46.2209	2.45281	0	0.855101
116	paddy (rice)	urea	112.5	surface	none	98.5	729.5	202	7.9	10.6	0.6	0.786739	0.019375	2.23255	0.0954545	46.2209	1.13828	131.163	5.60795	84.9416	1.80955
116	paddy (rice)	urea	150	surface	none	98.5	729.5	202	7.9	10.6	0.6	0.786739	0.019375	3.21657	0.144513	46.2209	1.13828	188.973	8.49015	142.752	2.70885
116	paddy (rice)	urea	187.5	surface	none	98.5	729.5	202	7.9	10.6	0.6	0.786739	0.019375	3.63293	0.1119	46.2209	1.13828	213.435	6.57414	167.214	2.10986
116	paddy (rice)	urea	225	surface	none	98.5	729.5	202	7.9	10.6	0.6	0.786739	0.019375	4.47574	0.143344	46.2209	1.13828	262.95	8.42146	216.729	2.68732
116	paddy (rice)	urea	300	surface	none	98.5	729.5	202	7.9	10.6	0.6	0.786739	0.019375	6.30029	0.185676	46.2209	1.13828	370.142	10.9085	323.921	3.4683
122	later rice	none	0	none	none	104.3	439.7	312	11.14	7.7	1.37	1.36634	0.15	1.36634	0.323636	80.2725	8.8125	80.2725	19.0136	0	6.62705
122	later rice	urea	180	subsrface	none	104.3	439.7	312	11.14	7.7	1.37	1.36634	0.15	2.44401	0.32261	80.2725	8.8125	143.586	18.9533	63.3132	6.60975
122	later rice	urea	144	subsrface	none	104.3	439.7	312	11.14	7.7	1.37	1.36634	0.15	2.15981	0.233009	80.2725	8.8125	126.889	13.6893	46.6161	5.14836
122	later rice	IU	180	subsrface	none	104.3	439.7	312	11.14	7.7	1.37	1.36634	0.15	1.83076	0.63274	80.2725	8.8125	107.557	37.1735	27.2848	12.0811
122	later rice	IU	144	subsrface	none	104.3	439.7	312	11.14	7.7	1.37	1.36634	0.15	2.30573	0.576161	80.2725	8.8125	135.462	33.8495	55.1891	11.061
23	rice	none	0	none	none	107.4	345.2	417	7.1	23.9	2.6	0.928571	0.0413333	0.928571	0.0693333	54.5536	2.42833	54.5536	4.07333	0	1.49963
23	rice	urea	90	surface	none	107.4	345.2	417	7.1	23.9	2.6	0.928571	0.0413333	1.34848	0.0885572	54.5536	2.42833	79.2235	5.20274	24.6699	1.81563
23	rice	urea	180	surface	none	107.4	345.2	417	7.1	23.9	2.6	0.928571	0.0413333	2.44124	0.156017	54.5536	2.42833	143.423	9.16598	88.8694	2.99853
23	rice	urea	270	surface	none	107.4	345.2	417	7.1	23.9	2.6	0.928571	0.0413333	2.9608	0.198431	54.5536	2.42833	173.947	11.6578	119.393	3.76566
23	rice	urea	360	surface	none	107.4	345.2	417	7.1	23.9	2.6	0.928571	0.0413333	5.89484	0.446743	54.5536	2.42833	346.322	26.2462	291.768	8.33522
23	rice	none	0	none	none	107.4	345.2	417	7.1	23.9	2.6	1.10345	0.0577465	1.10345	0.0901408	64.8276	3.39261	64.8276	5.29577	0	1.98884
23	rice	urea	90	subsurface	none	107.4	345.2	417	7.1	23.9	2.6	1.10345	0.0577465	1.66875	0.135443	64.8276	3.39261	98.0388	7.95728	33.2112	2.73547
23	rice	urea	180	subsurface	none	107.4	345.2	417	7.1	23.9	2.6	1.10345	0.0577465	2.98387	0.220896	64.8276	3.39261	175.302	12.9776	110.475	4.24179
23	rice	urea	270	subsurface	none	107.4	345.2	417	7.1	23.9	2.6	1.10345	0.0577465	3.88957	0.263071	64.8276	3.39261	228.512	15.4554	163.685	5.00379
23	rice	urea	360	subsurface	none	107.4	345.2	417	7.1	23.9	2.6	1.10345	0.0577465	6.81578	0.506667	64.8276	3.39261	400.427	29.7667	335.6	9.47399
23	rice	none	0	none	none	107.4	345.2	417	7.1	23.9	2.6	0.863061	0.0451613	0.863061	0.0725806	50.7048	2.65323	50.7048	4.26411	0	1.58815
23	rice	urea	90	surface	none	107.4	345.2	417	7.1	23.9	2.6	0.863061	0.0451613	1.15497	0.101282	50.7048	2.65323	67.8545	5.95032	17.1497	2.06024
23	rice	urea	180	surface	none	107.4	345.2	417	7.1	23.9	2.6	0.863061	0.0451613	1.92404	0.215493	50.7048	2.65323	113.038	12.6602	62.3328	4.09048
23	rice	urea	270	surface	none	107.4	345.2	417	7.1	23.9	2.6	0.863061	0.0451613	2.55775	0.296732	50.7048	2.65323	150.268	17.433	99.5628	5.57628
23	rice	urea	360	surface	none	107.4	345.2	417	7.1	23.9	2.6	0.863061	0.0451613	4.85572	0.485572	50.7048	2.65323	285.274	28.5274	234.569	9.06008
23	rice	none	0	none	none	112.8	460.1	417	7.1	23.9	2.6	0.955471	0.0408451	0.955471	0.0746479	56.1339	2.39965	56.1339	4.38556	0	1.58087
23	rice	urea	90	subsurface	none	112.8	460.1	417	7.1	23.9	2.6	0.955471	0.0408451	1.54206	0.127742	56.1339	2.39965	90.5958	7.50484	34.4618	2.4916
23	rice	urea	180	subsurface	none	112.8	460.1	417	7.1	23.9	2.6	0.955471	0.0408451	2.83994	0.269565	56.1339	2.39965	166.847	15.837	110.713	5.06525
23	rice	urea	270	subsurface	none	112.8	460.1	417	7.1	23.9	2.6	0.955471	0.0408451	3.31087	0.316384	56.1339	2.39965	194.513	18.5876	138.379	5.92669
23	rice	urea	360	subsurface	none	112.8	460.1	417	7.1	23.9	2.6	0.955471	0.0408451	5.28476	0.512438	56.1339	2.39965	310.48	30.1057	254.346	9.55046
23	rice	none	0	none	none	112.8	460.1	417	7.1	23.9	2.6	0.733083	0.0210526	0.733083	0.0684211	43.0686	1.23684	43.0686	4.01974	0	1.32996
23	rice	urea	90	surface	none	112.8	460.1	417	7.1	23.9	2.6	0.733083	0.0210526	1.06259	0.117742	43.0686	1.23684	62.4272	6.91734	19.3586	2.22215
23	rice	urea	180	surface	none	112.8	460.1	417	7.1	23.9	2.6	0.733083	0.0210526	1.62963	0.173684	43.0686	1.23684	95.7407	10.2039	52.6721	3.25039
23	rice	urea	270	surface	none	112.8	460.1	417	7.1	23.9	2.6	0.733083	0.0210526	2.26244	0.229885	43.0686	1.23684	132.919	13.5057	89.8499	4.28876
23	rice	urea	360	surface	none	112.8	460.1	417	7.1	23.9	2.6	0.733083	0.0210526	3.98039	0.365766	43.0686	1.23684	233.848	21.4887	190.779	6.80658
23	rice	none	0	none	none	112.8	460.1	417	7.1	23.9	2.6	0.878505	0.0531915	0.878505	0.1	51.6121	3.125	51.6121	5.875	0	2.10431
23	rice	urea	90	subsurface	none	112.8	460.1	417	7.1	23.9	2.6	0.878505	0.0531915	1.24102	0.152	51.6121	3.125	72.9099	8.93	21.2977	2.99183
23	rice	urea	180	subsurface	none	112.8	460.1	417	7.1	23.9	2.6	0.878505	0.0531915	1.96501	0.25	51.6121	3.125	115.444	14.6875	63.8322	4.74856
23	rice	urea	270	subsurface	none	112.8	460.1	417	7.1	23.9	2.6	0.878505	0.0531915	2.99284	0.257711	51.6121	3.125	175.829	15.1405	124.217	4.88878
23	rice	urea	360	subsurface	none	112.8	460.1	417	7.1	23.9	2.6	0.878505	0.0531915	4.58416	0.384232	51.6121	3.125	269.319	22.5737	217.707	7.20649
24	rice	none	0	none	none	107	728.5	205	5.7	25.2	2.5	0.752568	0.0342857	0.752568	0.0575714	44.2134	2.01429	44.2134	3.38232	0	1.24489
24	rice	urea	250	surface	none	107	728.5	205	5.7	25.2	2.5	0.752568	0.0342857	4.07531	0.491447	44.2134	2.01429	239.424	28.8725	195.211	9.15247
24	rice	UOA	250	surface	mulch	107	728.5	205	5.7	25.2	2.5	0.752568	0.0342857	4.7605	0.37444	44.2134	2.01429	279.679	21.9983	235.466	6.98559
24	rice	UOA	250	surface	mulch	107	728.5	205	5.7	25.2	2.5	0.752568	0.0342857	5.72967	0.412174	44.2134	2.01429	336.618	24.2152	292.405	7.68397
25	rice	none	0	none	none	105	401	275	6.3	9.9	0.7	0.448	0.0172662	0.448	0.0201439	26.32	1.01439	26.32	1.18345	0	0.492904
25	rice	UOA	100	surface	none	105	401	275	6.3	9.9	0.7	0.448	0.0172662	1.4878	0.0697143	26.32	1.01439	87.4085	4.09571	61.0885	1.33431
25	rice	UOA	200	surface	none	105	401	275	6.3	9.9	0.7	0.448	0.0172662	2.53275	0.115423	26.32	1.01439	148.799	6.78109	122.479	2.16823
25	rice	UOA	300	surface	none	105	401	275	6.3	9.9	0.7	0.448	0.0172662	2.91513	0.142342	26.32	1.01439	171.264	8.36261	144.944	2.66387
25	rice	urea	200	surface	none	105	401	275	6.3	9.9	0.7	0.448	0.0172662	2.18045	0.115423	26.32	1.01439	128.102	6.78109	101.782	2.16823
25	rice	none	0	none	none	103.5	712.7	275	6.3	9.9	0.7	1.9685	0.0504065	1.9685	0.105691	115.65	2.96138	115.65	6.20935	0	2.17545
25	rice	UOA	100	subsurface	none	103.5	712.7	275	6.3	9.9	0.7	1.9685	0.0504065	3.65432	0.145098	115.65	2.96138	214.691	8.52451	99.0418	2.85372
25	rice	UOA	200	subsurface	none	103.5	712.7	275	6.3	9.9	0.7	1.9685	0.0504065	4.14716	0.2976	115.65	2.96138	243.645	17.484	127.996	5.60767
25	rice	UOA	300	subsurface	none	103.5	712.7	275	6.3	9.9	0.7	1.9685	0.0504065	6.32594	0.377011	115.65	2.96138	371.649	22.1494	255.999	7.06659
25	rice	urea	200	subsurface	none	103.5	712.7	275	6.3	9.9	0.7	1.9685	0.0504065	4.24182	0.231351	115.65	2.96138	249.207	13.5919	133.558	4.39897
26	rice	none	0	none	none	103.9	558.4	205	6.9	13.2	1.5	1.19263	0.0317241	1.19263	0.0892414	70.0668	1.86379	70.0668	5.24293	0	1.7596
26	rice	urea	60	surface	none	103.9	558.4	205	6.9	13.2	1.5	1.19263	0.0317241	3.65835	0.223697	70.0668	1.86379	214.928	13.1422	144.861	4.19751
26	rice	OCF	60	surface	none	103.9	558.4	205	6.9	13.2	1.5	1.19263	0.0317241	5.73626	0.28189	70.0668	1.86379	337.005	16.561	266.938	5.27012
26	rice	IU	60	surface	none	103.9	558.4	205	6.9	13.2	1.5	1.19263	0.0317241	2.60934	0.146058	70.0668	1.86379	153.299	8.58091	83.2319	2.77679
26	rice	urea	60	subsurface	none	103.9	558.4	205	6.9	13.2	1.5	1.19263	0.0317241	2.76525	0.171963	70.0668	1.86379	162.459	10.1028	92.3919	3.2487
26	rice	OCF	60	subsurface	none	103.9	558.4	205	6.9	13.2	1.5	1.19263	0.0317241	4.20757	0.233766	70.0668	1.86379	247.195	13.7338	177.128	4.38281
26	rice	IU	60	subsurface	none	103.9	558.4	205	6.9	13.2	1.5	1.19263	0.0317241	2.54836	0.132271	70.0668	1.86379	149.716	7.77092	79.6492	2.52707
27	rice	none	0	none	none	105.3	284.8	280	6.3	25	1.6	1.25649	0.0606897	1.25649	0.0665403	73.8187	3.56552	73.8187	3.90924	0	1.67317
27	rice	urea	180	subsurface	none	105.3	284.8	280	6.3	25	1.6	1.25649	0.0606897	1.60928	0.106667	73.8187	3.56552	94.545	6.26667	20.7263	2.28
27	rice	urea	180	subsurface	inhibitor	105.3	284.8	280	6.3	25	1.6	1.25649	0.0606897	2.36513	0.139535	73.8187	3.56552	138.951	8.19767	65.1328	2.82692
27	rice	urea	240	subsurface	none	105.3	284.8	280	6.3	25	1.6	1.25649	0.0606897	2.12766	0.12648	73.8187	3.56552	125	7.43069	51.1813	2.6063
27	rice	urea	240	subsurface	inhibitor	105.3	284.8	280	6.3	25	1.6	1.25649	0.0606897	3.17913	0.200643	73.8187	3.56552	186.774	11.7878	112.955	3.89442
27	rice	urea	180	subsurface	none	109.2	584.7	280	6.3	25	1.6	1.25649	0.0606897	3.15454	0.208097	73.8187	3.56552	185.329	12.2257	111.51	4.02717
27	rice	urea	180	subsurface	inhibitor	109.2	584.7	280	6.3	25	1.6	1.25649	0.0606897	5.24049	0.339535	73.8187	3.56552	307.879	19.9477	234.06	6.40798
27	rice	urea	240	subsurface	none	109.2	584.7	280	6.3	25	1.6	1.25649	0.0606897	7.183	0.517409	73.8187	3.56552	422.001	30.3978	348.183	9.67852
27	rice	urea	240	subsurface	inhibitor	109.2	584.7	280	6.3	25	1.6	1.25649	0.0606897	9.62238	0.595775	73.8187	3.56552	565.315	35.0018	491.496	11.1258
29	rice	none	0	none	none	100.2	623.3	260	5.3	25.2	1.8	1.17186	0.0693548	1.17186	0.10371	68.8468	4.0746	68.8468	6.09294	0	2.31789
29	rice	urea	300	subsurface	none	100.2	623.3	260	5.3	25.2	1.8	1.17186	0.0693548	3.42574	0.215576	68.8468	4.0746	201.262	12.6651	132.416	4.20722
29	rice	none	0	none	biochar	100.2	623.3	260	5.3	25.2	1.8	1.17186	0.0693548	1.67751	0.119512	68.8468	4.0746	98.5536	7.02134	29.7068	2.56713
29	rice	urea	300	subsurface	biochar	100.2	623.3	260	5.3	25.2	1.8	1.17186	0.0693548	4.00528	0.320813	68.8468	4.0746	235.31	18.8478	166.463	6.09787
29	rice	urea	300	subsurface	inhibitor	100.2	623.3	260	5.3	25.2	1.8	1.17186	0.0693548	3.01902	0.203684	68.8468	4.0746	177.367	11.9664	108.52	3.99748
29	rice	urea	300	subsurface	biochar	100.2	623.3	260	5.3	25.2	1.8	1.17186	0.0693548	5.36531	0.343851	68.8468	4.0746	315.212	20.2013	246.365	6.51685
29	rice	urea	300	subsurface	biochar	100.2	623.3	260	5.3	25.2	1.8	1.17186	0.0693548	3.70516	0.285814	68.8468	4.0746	217.678	16.7916	148.831	5.46406
29	rice	none	0	none	none	101.4	1170.5	260	5.3	25.2	1.8	0.364542	0.008	0.364542	0.02928	21.4168	0.47	21.4168	1.7202	0	0.563914
29	rice	urea	300	subsurface	none	101.4	1170.5	260	5.3	25.2	1.8	0.364542	0.008	6.73114	0.507984	21.4168	0.47	395.454	29.8441	374.038	9.43869
29	rice	none	0	none	biochar	101.4	1170.5	260	5.3	25.2	1.8	0.364542	0.008	0.508141	0.0361783	21.4168	0.47	29.8533	2.12548	8.43645	0.688372
29	rice	urea	300	surface	biochar	101.4	1170.5	260	5.3	25.2	1.8	0.364542	0.008	6.08245	0.462362	21.4168	0.47	357.344	27.1638	335.927	8.59123
29	rice	urea	300	surface	inhibitor	101.4	1170.5	260	5.3	25.2	1.8	0.364542	0.008	4.899	0.35881	21.4168	0.47	287.816	21.0801	266.399	6.66777
29	rice	urea	300	surface	biochar	101.4	1170.5	260	5.3	25.2	1.8	0.364542	0.008	7.96716	0.530647	21.4168	0.47	468.071	31.1755	446.654	9.85969
29	rice	urea	300	surface	biochar	101.4	1170.5	260	5.3	25.2	1.8	0.364542	0.008	5.28772	0.412571	21.4168	0.47	310.653	24.2386	289.237	7.66635
30	rice	none	0	none	none	103.9	558.4	302	7.4	30.3	1.8	1.41243	0.0747126	1.41243	0.0948276	82.9802	4.38937	82.9802	5.57112	0	2.24285
30	rice	UOCF	403	surface	none	103.9	558.4	302	7.4	30.3	1.8	1.41243	0.0747126	14.0661	0.896246	82.9802	4.38937	826.381	52.6545	743.401	16.7086
30	rice	UOCF	162	surface	none	103.9	558.4	302	7.4	30.3	1.8	1.41243	0.0747126	4.06662	0.300093	82.9802	4.38937	238.914	17.6305	155.933	5.74544
30	rice	IU	180	subsurface	none	103.9	558.4	302	7.4	30.3	1.8	1.41243	0.0747126	4.05405	0.251321	82.9802	4.38937	238.176	14.7651	155.195	4.87108
30	rice	UOCF	403	surface	none	103.9	558.4	302	7.4	30.3	1.8	1.41243	0.0747126	11.9635	0.805595	82.9802	4.38937	702.857	47.3287	619.876	15.0309
30	rice	UOCF	162	surface	none	103.9	558.4	302	7.4	30.3	1.8	1.41243	0.0747126	4.89655	0.312282	82.9802	4.38937	287.672	18.3466	204.692	5.96543
30	rice	IU	180	subsurface	none	103.9	558.4	302	7.4	30.3	1.8	1.41243	0.0747126	2.74589	0.193714	82.9802	4.38937	161.321	11.3807	78.3409	3.85729
31	rice	none	0	none	none	105.2	859.7	285	7.4	35	2.1	0.246136	0.00117241	0.246136	0.0107393	14.4605	0.0688793	14.4605	0.630932	0	0.200704
31	rice	urea	300	subsurface	none	105.2	859.7	285	7.4	35	2.1	0.246136	0.00117241	5.14514	0.390758	14.4605	0.0688793	302.277	22.957	287.816	7.25968
31	rice	urea	370	subsurface	none	105.2	859.7	285	7.4	35	2.1	0.246136	0.00117241	2.58281	0.195636	14.4605	0.0688793	151.74	11.4936	137.28	3.63467
31	rice	UOA	375	subsurface	none	105.2	859.7	285	7.4	35	2.1	0.246136	0.00117241	5.75248	0.45748	14.4605	0.0688793	337.958	26.877	323.497	8.49927
31	rice	none	0	none	none	107	728.5	285	7.4	35	2.1	0.226395	0.00131613	1.33205	0.0979355	13.3007	0.0773226	78.2577	5.75371	64.957	1.81965
31	rice	urea	300	surface	none	107	728.5	285	7.4	35	2.1	0.226395	0.00131613	4.81833	0.332432	13.3007	0.0773226	283.077	19.5304	269.776	6.1761
31	rice	urea	370	surface	none	107	728.5	285	7.4	35	2.1	0.226395	0.00131613	2.81582	0.196623	13.3007	0.0773226	165.429	11.5516	152.129	3.65301
31	rice	UOA	375	surface	none	107	728.5	285	7.4	35	2.1	0.226395	0.00131613	7.42828	0.598204	13.3007	0.0773226	436.412	35.1445	423.111	11.1137
32	rice	none	0	none	none	106	1035.9	285	5.4	24.6	1.6	0.383739	0.024	0.383739	0.03232	22.5446	1.41	22.5446	1.8988	0	0.7479
32	rice	urea	100	subsurface	none	106	1035.9	285	5.4	24.6	1.6	0.383739	0.024	1.38623	0.132394	22.5446	1.41	81.4408	7.77817	58.8961	2.49976
32	rice	urea	200	subsurface	none	106	1035.9	285	5.4	24.6	1.6	0.383739	0.024	2.27909	0.25035	22.5446	1.41	133.897	14.708	111.352	4.67241
32	rice	urea	300	subsurface	none	106	1035.9	285	5.4	24.6	1.6	0.383739	0.024	5.23725	0.571429	22.5446	1.41	307.688	33.5714	285.144	10.6256
32	rice	urea	350	subsurface	none	106	1035.9	285	5.4	24.6	1.6	0.383739	0.024	4.60134	0.506878	22.5446	1.41	270.329	29.7791	247.784	9.42753
33	rice	none	0	none	none	101.4	1170.5	225	5.6	17.2	1.6	1.52215	0.0564516	1.52215	0.143548	89.4262	3.31653	89.4262	8.43347	0	2.86571
33	rice	urea	240	surface	mulch	101.4	1170.5	225	5.6	17.2	1.6	1.52215	0.0564516	8.13893	0.897143	89.4262	3.31653	478.162	52.7071	388.736	16.7004
33	rice	urea	240	subsurface	mulch	101.4	1170.5	225	5.6	17.2	1.6	1.52215	0.0564516	11.5551	1.09055	89.4262	3.31653	678.861	64.0697	589.435	20.2877
33	rice	urea	240	surface	none	101.4	1170.5	225	5.6	17.2	1.6	1.52215	0.0564516	4.27465	0.407882	89.4262	3.31653	251.136	23.9631	161.71	7.65002
33	rice	urea	240	subsurface	none	101.4	1170.5	225	5.6	17.2	1.6	1.52215	0.0564516	5.97887	0.54486	89.4262	3.31653	351.259	32.0105	261.833	10.1768
33	rice	none	0	none	none	106.1	929.6	225	5.6	17.2	1.6	2.62706	0.083871	2.62706	0.197419	154.34	4.92742	154.34	11.5984	0	3.985
33	rice	urea	240	surface	mulch	106.1	929.6	225	5.6	17.2	1.6	2.62706	0.083871	7.5582	0.872189	154.34	4.92742	444.044	51.2411	289.704	16.2786
33	rice	urea	240	subsurface	mulch	106.1	929.6	225	5.6	17.2	1.6	2.62706	0.083871	10.7105	1.00796	154.34	4.92742	629.242	59.2177	474.903	18.791
33	rice	urea	240	surface	none	106.1	929.6	225	5.6	17.2	1.6	2.62706	0.083871	4.99269	0.390204	154.34	4.92742	293.32	22.9245	138.981	7.41493
33	rice	urea	240	subsurface	none	106.1	929.6	225	5.6	17.2	1.6	2.62706	0.083871	6.25065	0.517597	154.34	4.92742	367.226	30.4088	212.886	9.74153
34	rice	none	0	none	none	100.2	623.3	285	6.4	22.8	1.6	0.709992	0.0295775	0.709992	0.0532394	41.7121	1.73768	41.7121	3.12782	0	1.13149
34	rice	urea	240	surface	none	100.2	623.3	285	6.4	22.8	1.6	0.709992	0.0295775	1.8888	0.141825	41.7121	1.73768	110.967	8.33222	69.2549	2.69157
34	rice	urea	240	subsurface	biochar	100.2	623.3	285	6.4	22.8	1.6	0.709992	0.0295775	2.42953	0.18251	41.7121	1.73768	142.735	10.7225	101.023	3.43497
34	rice	urea	240	surface	biochar	100.2	623.3	285	6.4	22.8	1.6	0.709992	0.0295775	3.38393	0.276017	41.7121	1.73768	198.806	16.216	157.094	5.15731
34	rice	urea	240	surface	biochar	100.2	623.3	285	6.4	22.8	1.6	0.709992	0.0295775	2.10364	0.165992	41.7121	1.73768	123.589	9.75202	81.877	3.13244
34	rice	urea	240	subsurface	biochar	100.2	623.3	285	6.4	22.8	1.6	0.709992	0.0295775	2.73913	0.18493	41.7121	1.73768	160.924	10.8646	119.212	3.47936
35	rice	none	0	none	none	105.2	859.7	302	7.2	38.8	2.2	1.35517	0.0193548	1.35517	0.0774194	79.616	1.1371	79.616	4.54839	0	1.48259
35	rice	urea	180	surface	none	105.2	859.7	302	7.2	38.8	2.2	1.35517	0.0193548	4.73872	0.302273	79.616	1.1371	278.4	17.7585	198.784	5.62724
35	rice	urea	240	surface	none	105.2	859.7	302	7.2	38.8	2.2	1.35517	0.0193548	6.82948	0.419934	79.616	1.1371	401.232	24.6711	321.616	7.80997
35	rice	urea	180	surface	mulch	105.2	859.7	302	7.2	38.8	2.2	1.35517	0.0193548	6.18932	0.416327	79.616	1.1371	363.623	24.4592	284.007	7.74303
35	rice	urea	240	surface	mulch	105.2	859.7	302	7.2	38.8	2.2	1.35517	0.0193548	9.21566	0.671545	79.616	1.1371	541.42	39.4533	461.804	12.4814
35	rice	none	0	none	none	105.2	859.7	302	7.2	38.8	2.2	1.32523	0.0169014	1.32523	0.0676056	77.8575	0.992958	77.8575	3.97183	0	1.29466
35	rice	urea	180	subsurface	none	105.2	859.7	302	7.2	38.8	2.2	1.32523	0.0169014	2.39108	0.158175	77.8575	0.992958	140.476	9.29278	62.6184	2.95536
35	rice	urea	240	subsurface	none	105.2	859.7	302	7.2	38.8	2.2	1.32523	0.0169014	4.01146	0.242308	77.8575	0.992958	235.673	14.2356	157.816	4.51262
35	rice	urea	180	subsurface	mulch	105.2	859.7	302	7.2	38.8	2.2	1.32523	0.0169014	3.41769	0.309091	77.8575	0.992958	200.789	18.1591	122.932	5.75099
35	rice	urea	240	subsurface	mulch	105.2	859.7	302	7.2	38.8	2.2	1.32523	0.0169014	4.91304	0.284277	77.8575	0.992958	288.641	16.7013	210.784	5.29073
36	rice	none	0	none	none	102.9	887.8	280	6.3	22.8	1.6	0.930686	0.0336	0.930686	0.084	54.6778	1.974	54.6778	4.935	0	1.6808
36	rice	urea	225	surface	none	102.9	887.8	280	6.3	22.8	1.6	0.930686	0.0336	2.00248	0.152618	54.6778	1.974	117.646	8.96631	62.9678	2.9033
36	rice	UIU	225	surface	none	102.9	887.8	280	6.3	22.8	1.6	0.930686	0.0336	1.50769	0.103939	54.6778	1.974	88.5769	6.10644	33.8991	2.02942
36	rice	urea	225	surface	none	102.9	887.8	280	6.3	22.8	1.6	0.930686	0.0336	0.884444	0.0626772	54.6778	1.974	51.9611	3.68228	2.71669	1.32121
36	rice	urea	225	subsurface	none	102.9	887.8	280	6.3	22.8	1.6	0.930686	0.0336	1.89553	0.13315	54.6778	1.974	111.362	7.82254	56.6844	2.55125
36	rice	urea	225	subsurface	none	102.9	887.8	280	6.3	22.8	1.6	0.930686	0.0336	1.19448	0.0822053	54.6778	1.974	70.1754	4.82956	15.4976	1.64989
37	rice	none	0	none	none	100.2	623.3	280	6.3	22.5	1.6	0.2749	0.0116129	0.2749	0.0178065	16.1504	0.682258	16.1504	1.04613	0	0.394951
37	rice	urea	225	surface	none	100.2	623.3	280	6.3	22.5	1.6	0.2749	0.0116129	1.7033	0.10299	16.1504	0.682258	100.069	6.05066	83.9183	1.92551
37	rice	urea	225	subsurface	biochar	100.2	623.3	280	6.3	22.5	1.6	0.2749	0.0116129	1.83333	0.106109	16.1504	0.682258	107.708	6.23392	91.5579	1.98311
37	rice	urea	225	subsurface	biochar	100.2	623.3	280	6.3	22.5	1.6	0.2749	0.0116129	2.76774	0.182156	16.1504	0.682258	162.604	10.7017	146.454	3.39104
39	rice	none	0	none	none	103.9	558.4	505	7.2	9.8	0.8	0.078	0.000995025	0.078	0.0038806	4.5825	0.0584577	4.5825	0.227985	0	0.0744275
39	rice	urea	100	surface	none	103.9	558.4	505	7.2	9.8	0.8	0.078	0.000995025	1.76544	0.0887843	4.5825	0.0584577	103.72	5.21608	99.1371	1.64957
39	rice	urea	200	surface	none	103.9	558.4	505	7.2	9.8	0.8	0.078	0.000995025	4.09622	0.235349	4.5825	0.0584577	240.653	13.8267	236.07	4.37244
39	rice	urea	300	surface	none	103.9	558.4	505	7.2	9.8	0.8	0.078	0.000995025	7.18591	0.465855	4.5825	0.0584577	422.172	27.369	417.59	8.65486
39	rice	urea	400	surface	none	103.9	558.4	505	7.2	9.8	0.8	0.078	0.000995025	9.82825	0.797121	4.5825	0.0584577	577.41	46.8308	572.827	14.8092
39	rice	none	0	none	none	105.2	859.7	505	7.2	9.8	0.8	1.44649	0.0796117	1.44649	0.0817476	84.9811	4.67718	84.9811	4.80267	0	2.11995
39	rice	urea	100	subsurface	none	105.2	859.7	505	7.2	9.8	0.8	1.44649	0.0796117	1.64285	0.102056	84.9811	4.67718	96.5172	5.99579	11.5361	2.4047
39	rice	urea	200	subsurface	none	105.2	859.7	505	7.2	9.8	0.8	1.44649	0.0796117	3.21043	0.233143	84.9811	4.67718	188.613	13.6971	103.632	4.57698
39	rice	urea	300	subsurface	none	105.2	859.7	505	7.2	9.8	0.8	1.44649	0.0796117	5.4594	0.367176	84.9811	4.67718	320.739	21.5716	235.758	6.98004
39	rice	urea	400	subsurface	none	105.2	859.7	505	7.2	9.8	0.8	1.44649	0.0796117	8.25918	0.565325	84.9811	4.67718	485.227	33.2128	400.246	10.6064
40	rice	none	0	none	none	106.8	802.2	268	7.3	5.7	1.5	0.402994	0.0196721	0.402994	0.0344262	23.6759	1.15574	23.6759	2.02254	0	0.736641
40	rice	urea	200	surface	biochar	106.8	802.2	268	7.3	5.7	1.5	0.402994	0.0196721	1.03978	0.131631	23.6759	1.15574	61.0868	7.73333	37.411	2.47265
40	rice	urea	200	surface	biochar	106.8	802.2	268	7.3	5.7	1.5	0.402994	0.0196721	1.4065	0.180741	23.6759	1.15574	82.632	10.6185	58.9561	3.3777
40	rice	urea	200	surface	biochar	106.8	802.2	268	7.3	5.7	1.5	0.402994	0.0196721	1.72111	0.158919	23.6759	1.15574	101.115	9.33649	77.4393	2.97499
41	rice	none	0	none	none	109.2	584.7	275	6.6	22.8	1.4	0.444996	0.0103226	0.444996	0.0300645	26.1435	0.606452	26.1435	1.76629	0	0.590556
41	rice	urea	225	surface	none	109.2	584.7	275	6.6	22.8	1.4	0.444996	0.0103226	10.5934	0.959204	26.1435	0.606452	622.363	56.3532	596.219	17.8215
41	rice	urea	157.5	surface	none	109.2	584.7	275	6.6	22.8	1.4	0.444996	0.0103226	8.902	0.763218	26.1435	0.606452	522.992	44.8391	496.849	14.1807
41	rice	IU	225	surface	none	109.2	584.7	275	6.6	22.8	1.4	0.444996	0.0103226	6.29297	0.485714	26.1435	0.606452	369.712	28.5357	343.568	9.02582
41	rice	IU	157.5	surface	none	109.2	584.7	275	6.6	22.8	1.4	0.444996	0.0103226	4.69136	0.35514	26.1435	0.606452	275.617	20.8645	249.474	6.60072
41	rice	none	0	none	none	100.2	623.3	275	6.6	22.8	1.4	0.448077	0.0129032	0.448077	0.0375806	26.3245	0.758065	26.3245	2.20786	0	0.738195
41	rice	urea	225	subsurface	none	100.2	623.3	275	6.6	22.8	1.4	0.448077	0.0129032	2.66883	0.253333	26.3245	0.758065	156.794	14.8833	130.469	4.71262
41	rice	urea	157.5	subsurface	none	100.2	623.3	275	6.6	22.8	1.4	0.448077	0.0129032	2.25574	0.0170635	26.3245	0.758065	132.525	1.00248	106.2	0.397445
41	rice	IU	225	subsurface	none	100.2	623.3	275	6.6	22.8	1.4	0.448077	0.0129032	0.959018	0.0647018	26.3245	0.758065	56.3423	3.80123	30.0178	1.22572
41	rice	IU	157.5	subsurface	none	100.2	623.3	275	6.6	22.8	1.4	0.448077	0.0129032	0.87479	0.0594286	26.3245	0.758065	51.3939	3.49143	25.0694	1.12981
44	rice	none	0	none	none	103.4	1069.3	205	5.4	68	3.5	0.678647	0.0341463	0.678647	0.0577236	39.8705	2.0061	39.8705	3.39126	0	1.246
44	rice	urea	270	surface	none	103.4	1069.3	205	5.4	68	3.5	0.678647	0.0341463	5.57907	0.437652	39.8705	2.0061	327.77	25.712	287.9	8.15557
44	rice	urea	270	surface	mulch	103.4	1069.3	205	5.4	68	3.5	0.678647	0.0341463	6.01606	0.458353	39.8705	2.0061	353.443	26.9282	313.573	8.53905
44	rice	urea	270	surface	biochar	103.4	1069.3	205	5.4	68	3.5	0.678647	0.0341463	4.75901	0.35	39.8705	2.0061	279.592	20.5625	239.721	6.53331
44	rice	urea	270	surface	biochar	103.4	1069.3	205	5.4	68	3.5	0.678647	0.0341463	4.60337	0.333358	39.8705	2.0061	270.448	19.5848	230.577	6.22565
46	rice	none	0	none	none	108	703.7	114	6.8	13.7	0.5	0.726456	0.0208	0.726456	0.06208	42.6793	1.222	42.6793	3.6472	0	1.21636
46	rice	OA	0	none	none	108	703.7	114	6.8	13.7	0.5	0.726456	0.0208	0.888889	0.0717419	42.6793	1.222	52.2222	4.21484	9.54295	1.38774
46	rice	UOA	135	surface	none	108	703.7	114	6.8	13.7	0.5	0.726456	0.0208	1.04155	0.0712796	42.6793	1.222	61.1911	4.18768	18.5119	1.37949
46	rice	UOA	180	surface	none	108	703.7	114	6.8	13.7	0.5	0.726456	0.0208	1.16895	0.0848069	42.6793	1.222	68.6761	4.9824	25.9968	1.62227
46	rice	UOA	225	surface	none	108	703.7	114	6.8	13.7	0.5	0.726456	0.0208	1.32011	0.094332	42.6793	1.222	77.5567	5.542	34.8774	1.79463
46	rice	UOA	270	surface	none	108	703.7	114	6.8	13.7	0.5	0.726456	0.0208	1.38079	0.0892568	42.6793	1.222	81.1213	5.24383	38.442	1.70268
46	rice	UOA	360	surface	none	108	703.7	114	6.8	13.7	0.5	0.726456	0.0208	2.00369	0.132862	42.6793	1.222	117.717	7.80563	75.0372	2.49842
46	rice	none	0	none	none	113.4	605.2	114	6.8	13.7	0.5	0.606178	0.0136842	0.606178	0.0328421	35.613	0.803947	35.613	1.92947	0	0.660999
46	rice	OA	0	none	none	113.4	605.2	114	6.8	13.7	0.5	0.606178	0.0157895	0.640492	0.0319502	35.613	0.927632	37.6289	1.87707	2.01595	0.662111
46	rice	UOA	135	surface	none	113.4	605.2	114	6.8	13.7	0.5	0.606178	0.0157895	3.20878	0.176471	35.613	0.927632	188.516	10.3676	152.903	3.29163
46	rice	UOA	180	surface	none	113.4	605.2	114	6.8	13.7	0.5	0.606178	0.0157895	3.47577	0.205396	35.613	0.927632	204.202	12.067	168.589	3.82718
46	rice	UOA	225	surface	none	113.4	605.2	114	6.8	13.7	0.5	0.606178	0.0157895	4.11323	0.225209	35.613	0.927632	241.652	13.231	206.039	4.19429
46	rice	UOA	270	surface	none	113.4	605.2	114	6.8	13.7	0.5	0.606178	0.0157895	4.63303	0.28186	35.613	0.927632	272.19	16.5593	236.577	5.24472
46	rice	UOA	360	surface	none	113.4	605.2	114	6.8	13.7	0.5	0.606178	0.0157895	5.83712	0.352336	35.613	0.927632	342.931	20.6998	307.318	6.55241
46	rice	none	0	none	none	104.4	748.7	114	6.8	13.7	0.5	0.726592	0.0190476	0.726592	0.0527891	42.6873	1.11905	42.6873	3.10136	0	1.04263
46	rice	OA	0	none	none	104.4	748.7	114	6.8	13.7	0.5	0.726592	0.0190476	0.716084	0.0587097	42.6873	1.11905	42.07	3.44919	0.61731	1.1467
46	rice	UOA	135	surface	none	104.4	748.7	114	6.8	13.7	0.5	0.726592	0.0190476	2.95013	0.331839	42.6873	1.11905	173.32	19.4955	130.633	6.17518
46	rice	UOA	180	surface	none	104.4	748.7	114	6.8	13.7	0.5	0.726592	0.0190476	4.70551	0.381026	42.6873	1.11905	276.449	22.3853	233.761	7.08768
46	rice	UOA	225	surface	none	104.4	748.7	114	6.8	13.7	0.5	0.726592	0.0190476	6.06849	0.387765	42.6873	1.11905	356.524	22.7812	313.837	7.21273
46	rice	UOA	270	surface	none	104.4	748.7	114	6.8	13.7	0.5	0.726592	0.0190476	6.68053	0.451939	42.6873	1.11905	392.481	26.5514	349.794	8.40375
46	rice	UOA	360	surface	none	104.4	748.7	114	6.8	13.7	0.5	0.726592	0.0190476	8.44301	0.554355	42.6873	1.11905	496.027	32.5684	453.339	10.3051
47	rice	none	0	none	none	109.9	427.5	314	6.8	11.2	1	0.416019	0.0193548	0.416019	0.0345161	24.4411	1.1371	24.4411	2.02782	0	0.735191
47	rice	urea	80	subsurface	none	109.9	427.5	314	6.8	11.2	1	0.416019	0.0193548	0.934824	0.0610427	24.4411	1.1371	54.9209	3.58626	30.4798	1.18972
47	rice	urea	160	subsurface	none	109.9	427.5	314	6.8	11.2	1	0.416019	0.0193548	1.2386	0.0767059	24.4411	1.1371	72.7679	4.50647	48.3268	1.46974
47	rice	urea	240	subsurface	none	109.9	427.5	314	6.8	11.2	1	0.416019	0.0193548	1.37573	0.0998479	24.4411	1.1371	80.8243	5.86606	56.3832	1.88954
47	rice	none	0	none	none	109.9	427.5	314	6.8	11.2	1	0.587905	0.0222222	0.587905	0.0465185	34.5394	1.30556	34.5394	2.73296	0	0.957787
47	rice	urea	80	surface	none	109.9	427.5	314	6.8	11.2	1	0.587905	0.0222222	1.15036	0.0991195	34.5394	1.30556	67.5839	5.82327	33.0445	1.88719
47	rice	urea	160	surface	none	109.9	427.5	314	6.8	11.2	1	0.587905	0.0222222	1.58353	0.121294	34.5394	1.30556	93.0323	7.126	58.4929	2.29094
47	rice	urea	240	surface	none	109.9	427.5	314	6.8	11.2	1	0.587905	0.0222222	1.7375	0.153839	34.5394	1.30556	102.078	9.03803	67.5388	2.88774
49	rice	none	0	none	none	83.9	916.5	423	5.4	14.8	1.7	0.164779	0.00645161	0.164779	0.0103226	9.68074	0.379032	9.68074	0.606452	0	0.226152
49	rice	OCF	90	surface	none	83.9	916.5	423	5.4	14.8	1.7	0.164779	0.00645161	1.75	0.119431	9.68074	0.379032	102.812	7.01659	93.1318	2.22207
49	rice	OCF	90	subsurface	none	83.9	916.5	423	5.4	14.8	1.7	0.164779	0.00645161	1.65723	0.11215	9.68074	0.379032	97.3622	6.58879	87.6815	2.087
49	rice	OCF	90	subsurface	none	83.6	1263.2	423	5.4	14.8	1.7	0.164779	0.00645161	0.85656	0.053617	9.68074	0.379032	50.3229	3.15	40.6422	1.0033
49	rice	OCF	90	subsurface	none	83.6	1263.2	423	5.4	14.8	1.7	0.164779	0.00645161	1.25978	0.0788382	9.68074	0.379032	74.0121	4.63174	64.3313	1.46958
49	rice	IU	90	surface	none	83.6	1263.2	423	5.4	14.8	1.7	0.164779	0.00645161	0.415854	0.0271186	9.68074	0.379032	24.4314	1.59322	14.7507	0.517882
49	rice	IU	90	subsurface	none	83.6	1263.2	423	5.4	14.8	1.7	0.164779	0.00645161	0.358974	0.0235294	9.68074	0.379032	21.0897	1.38235	11.409	0.453273
49	rice	IU	90	subsurface	none	83.6	1263.2	423	5.4	14.8	1.7	0.164779	0.00645161	0.356461	0.0261682	9.68074	0.379032	20.9421	1.53738	11.2613	0.500721
55	rice	none	0	none	none	105.7	645.6	355	6.9	13.2	1.5	1.14425	0.0546875	1.14425	0.0989063	67.2248	3.21289	67.2248	5.81074	0	2.0997
55	rice	urea	330	subsurface	none	105.7	645.6	355	6.9	13.2	1.5	1.14425	0.0546875	6.32974	0.518219	67.2248	3.21289	371.872	30.4453	304.647	9.68112
55	rice	urea	330	subsurface	none	105.7	645.6	355	6.9	13.2	1.5	1.14425	0.0546875	7.05226	0.549407	67.2248	3.21289	414.32	32.2777	347.095	10.2575
55	rice	IU	240	subsurface	none	105.7	645.6	355	6.9	13.2	1.5	1.14425	0.0546875	3.35366	0.283262	67.2248	3.21289	197.027	16.6416	129.803	5.35973
55	rice	IU	240	subsurface	none	105.7	645.6	355	6.9	13.2	1.5	1.14425	0.0546875	2.47859	0.1829	67.2248	3.21289	145.617	10.7454	78.3923	3.54662
58	rice	none	0	none	none	112.8	460.1	517	6.8	35	2.7	0.784314	0.0348315	0.784314	0.0449438	46.0784	2.04635	46.0784	2.64045	0	1.05639
58	rice	urea	180	surface	none	112.8	460.1	517	6.8	35	2.7	0.784314	0.0348315	1.7284	0.109804	46.0784	2.04635	101.543	6.45098	55.4648	2.14016
58	rice	urea	180	surface	inhibitor	112.8	460.1	517	6.8	35	2.7	0.784314	0.0348315	1.7697	0.121162	46.0784	2.04635	103.97	7.11826	57.8913	2.34216
58	rice	none	0	none	none	112.8	460.1	517	6.8	35	2.7	0.806142	0.0370787	0.806142	0.0363636	47.3608	2.17837	47.3608	2.13636	0	0.96485
58	rice	urea	180	surface	none	112.8	460.1	517	6.8	35	2.7	0.806142	0.0370787	2.78307	0.204673	47.3608	2.17837	163.506	12.0245	116.145	3.86438
58	rice	urea	180	surface	inhibitor	112.8	460.1	517	6.8	35	2.7	0.806142	0.0370787	2.75862	0.188235	47.3608	2.17837	162.069	11.0588	114.708	3.56431
60	rice	none	0	none	none	119.1	655.3	280	6.1	31.7	2.1	1.36404	0.452632	1.36404	0.405263	80.1373	26.5921	80.1373	23.8092	0	11.2872
60	rice	UOCF	270	surface	none	119.1	655.3	280	6.1	31.7	2.1	1.36404	0.452632	2.69835	0.424715	80.1373	26.5921	158.528	24.952	78.3906	11.5315
60	rice	UOCF	270	surface	none	119.1	655.3	280	6.1	31.7	2.1	1.36404	0.452632	3.19941	0.371288	80.1373	26.5921	187.965	21.8132	107.828	10.8764
60	rice	IU	270	surface	none	119.1	655.3	280	6.1	31.7	2.1	1.36404	0.452632	2.18359	0.267799	80.1373	26.5921	128.286	15.7332	48.1486	9.77074
60	rice	IU	270	surface	none	119.1	655.3	280	6.1	31.7	2.1	1.36404	0.452632	1.96043	0.666207	80.1373	26.5921	115.175	39.1397	35.0377	14.9635
60	rice	IU	270	surface	none	119.1	655.3	280	6.1	31.7	2.1	1.36404	0.452632	1.67742	0.190171	80.1373	26.5921	98.5484	11.1726	18.4111	9.12122
60	rice	OA	270	surface	none	119.1	655.3	280	6.1	31.7	2.1	1.36404	0.452632	2.94678	0.311038	80.1373	26.5921	173.123	18.2735	92.986	10.2032
140	rice (2014)	biochar	0	none	none	122.3	611.4	260	22.3	5.3	1.8	1.85135	0.0405405	1.85135	0.111081	108.767	2.38176	108.767	6.52601	0	2.19685
140	rice (2014)	urea	300	surface	none	122.3	611.4	260	22.3	5.3	1.8	1.85135	0.0405405	5.64536	0.212727	108.767	2.38176	331.665	12.4977	222.898	4.02326
140	rice (2014)	urea + biochar	300	surface	biochar	122.3	611.4	260	22.3	5.3	1.8	1.85135	0.0405405	5.74094	0.348667	108.767	2.38176	337.28	20.4842	228.514	6.5213
140	rice (2014)	urea + biochar + urease inhibitor	300	surface	biochar	122.3	611.4	260	22.3	5.3	1.8	1.85135	0.0405405	4.39933	0.127581	108.767	2.38176	258.461	7.49536	149.694	2.48703
140	rice (2014)	urea + biochar + nitrification inhibitor	300	surface	inhibitor	122.3	611.4	260	22.3	5.3	1.8	1.85135	0.0405405	2.94902	0.12725	108.767	2.38176	173.255	7.47594	64.4877	2.48118
140	rice (2014)	urea + biochar + urease inhibitor + nitrification inhibitor	300	surface	inhibitor	122.3	611.4	260	22.3	5.3	1.8	1.85135	0.0405405	2.51863	0.115857	108.767	2.38176	147.97	6.80661	39.2028	2.28041
140	rice (2015)	none	0	none	none	122.3	611.4	260	22.3	5.3	1.8	1.93673	0.0375	1.93673	0.104583	113.783	2.20312	113.783	6.14427	0	2.06412
140	rice (2015)	biochar	0	none	none	122.3	611.4	260	22.3	5.3	1.8	1.93673	0.0375	6.14248	0.256278	113.783	2.20312	360.871	15.0563	247.088	4.81193
140	rice (2015)	urea	300	surface	biochar	122.3	611.4	260	22.3	5.3	1.8	1.93673	0.0375	5.89655	0.342	113.783	2.20312	346.422	20.0925	232.64	6.39189
140	rice (2015)	urea + biochar	300	surface	biochar	122.3	611.4	260	22.3	5.3	1.8	1.93673	0.0375	3.54604	0.1656	113.783	2.20312	208.33	9.729	94.547	3.15448
140	rice (2015)	urea + biochar + urease inhibitor	300	surface	inhibitor	122.3	611.4	260	22.3	5.3	1.8	1.93673	0.0375	2.59979	0.0571364	113.783	2.20312	152.738	3.35676	38.9551	1.26971
140	rice (2015)	urea + biochar + nitrification inhibitor	300	surface	inhibitor	122.3	611.4	260	22.3	5.3	1.8	1.93673	0.0375	2.52142	0.0524565	113.783	2.20312	148.133	3.08182	34.3507	1.19797
140	rice (2015)	urea + biochar + urease inhibitor + nitrification inhibitor	300	surface	inhibitor	122.3	611.4	260	22.3	5.3	1.8	1.93673	0.0375	2.49206	0.123947	113.783	2.20312	146.409	7.28191	32.6259	2.40583
141	rice (2018)	none	0	none	none	122.3	611.4	195.5	16.62	7.5	0.9	1.29748	0.0360825	1.29748	0.071134	76.227	2.11985	76.227	4.17912	0	1.48185
141	rice (2018)	urea	270	surface	none	122.3	611.4	195.5	16.62	7.5	0.9	1.29748	0.0360825	2.76382	0.189861	76.227	2.11985	162.374	11.1543	86.1473	3.59044
141	rice (2018)	urea + azolla	270	surface	none	122.3	611.4	195.5	16.62	7.5	0.9	1.29748	0.0360825	2.19768	0.112959	76.227	2.11985	129.114	6.63636	52.8868	2.20307
141	rice (2018)	urea + urease inhibitor	270	surface	inhibitor	122.3	611.4	195.5	16.62	7.5	0.9	1.29748	0.0360825	2.15879	0.0557397	76.227	2.11985	126.829	3.27471	50.602	1.23359
141	rice (2018)	urea + azolla + urease inhibitor	270	surface	inhibitor	122.3	611.4	195.5	16.62	7.5	0.9	1.29748	0.0360825	1.47832	0.156822	76.227	2.11985	86.8515	9.21331	10.6245	2.98963
141	rice (2019)	none	0	none	none	122.3	611.4	195.5	16.62	7.5	0.9	1.18006	0.0360825	1.18006	0.021248	69.3283	2.11985	69.3283	1.24832	0	0.777949
141	rice (2019)	urea	270	surface	none	122.3	611.4	195.5	16.62	7.5	0.9	1.18006	0.0360825	2.75773	0.0887015	69.3283	2.11985	162.016	5.21121	92.6881	1.77906
141	rice (2019)	urea + azolla	270	surface	none	122.3	611.4	195.5	16.62	7.5	0.9	1.18006	0.0360825	2.092	0.077668	69.3283	2.11985	122.905	4.563	53.5765	1.59106
141	rice (2019)	urea + urease inhibitor	270	surface	inhibitor	122.3	611.4	195.5	16.62	7.5	0.9	1.18006	0.0360825	1.6882	0.0762253	69.3283	2.11985	99.1818	4.47823	29.8534	1.56679
141	rice (2019)	urea + azolla + urease inhibitor	270	surface	inhibitor	122.3	611.4	195.5	16.62	7.5	0.9	1.18006	0.0360825	1.25045	0.0533329	69.3283	2.11985	73.4637	3.13331	4.13533	1.1963
143	rice	none	0	none	none	119.5	623.04	266	27.8	6.05	1.81	0.017284	0.00078125	0.017284	0.000429448	1.01543	0.0458984	1.01543	0.0252301	0	0.0165627
143	rice	urea	100	surface	none	119.5	623.04	266	27.8	6.05	1.81	0.017284	0.00078125	0.697409	0.0195722	1.01543	0.0458984	40.9728	1.14987	39.9573	0.363909
143	rice	urea	300	surface	none	119.5	623.04	266	27.8	6.05	1.81	0.017284	0.00078125	1.50886	0.0764103	1.01543	0.0458984	88.6456	4.4891	87.6301	1.41965

## Sheet: Wheat AEP
																				AEP
						Driving factors						yield scaled emission (kg N /Mg grains)				Eutrophication potential (PO4-eq. /Mg grains)				Effect size
Id	Crop type	Fertilizer type	N rate	Application depth	Amendments	T	P	clay (g/kg)	pH	SOM (g/kg)	N (g/kg)	CK	SD	Treat	SD	CK	SD	Treat	SD	mean	SD
225	wheat (2011)	none	0	none	none	64.5	266	230	8.5	13.8	1.07	1.44065	0.0240109	1.44065	0.0240109	0.144065	0.00240109	0.144065	0.00240109	0	0.0010738
225	wheat (2011)	urea	80	surface	none	64.5	266	230	8.5	13.8	1.07	1.44065	0.0240109	2.82715	0.0471192	0.144065	0.00240109	0.282715	0.00471192	0.13865	0.00167235
225	wheat (2011)	urea	160	surface	none	64.5	266	230	8.5	13.8	1.07	1.44065	0.0240109	4.48259	0.0747099	0.144065	0.00240109	0.448259	0.00747099	0.304194	0.00248155
225	wheat (2011)	urea	240	surface	none	64.5	266	230	8.5	13.8	1.07	1.44065	0.0240109	6.50902	0.108484	0.144065	0.00240109	0.650902	0.0108484	0.506837	0.00351358
225	wheat (2011)	urea	320	surface	none	64.5	266	230	8.5	13.8	1.07	1.44065	0.0240109	7.4946	0.12491	0.144065	0.00240109	0.74946	0.012491	0.605395	0.00402232
225	wheat (2012)	none	0	none	none	64.5	266	230	8.5	13.8	1.07	1.32184	0.0220307	1.54023	0.0256705	0.132184	0.00220307	0.154023	0.00256705	0.0218391	0.00106973
225	wheat (2012)	urea	80	surface	none	64.5	266	230	8.5	13.8	1.07	1.32184	0.0220307	4.06572	0.0677619	0.132184	0.00220307	0.406572	0.00677619	0.274388	0.00225323
225	wheat (2012)	urea	160	surface	none	64.5	266	230	8.5	13.8	1.07	1.32184	0.0220307	4.69778	0.0782963	0.132184	0.00220307	0.469778	0.00782963	0.337594	0.00257209
225	wheat (2012)	urea	240	surface	none	64.5	266	230	8.5	13.8	1.07	1.32184	0.0220307	7.25389	0.120898	0.132184	0.00220307	0.725389	0.0120898	0.593205	0.00388609
225	wheat (2012)	urea	320	surface	none	64.5	266	230	8.5	13.8	1.07	1.32184	0.0220307	8.05167	0.134195	0.132184	0.00220307	0.805167	0.0134195	0.672984	0.00430041
225	wheat (2013)	none	0	none	none	64.5	266	230	8.5	13.8	1.07	1.32184	0.0220307	6.38403	0.1064	0.132184	0.00220307	0.638403	0.01064	0.506219	0.00343605
225	wheat (2013)	urea	80	surface	none	64.5	266	230	8.5	13.8	1.07	1.32184	0.0220307	6.14257	0.102376	0.132184	0.00220307	0.614257	0.0102376	0.482073	0.00331153
225	wheat (2013)	urea	160	surface	none	64.5	266	230	8.5	13.8	1.07	1.32184	0.0220307	20.0158	0.333596	0.132184	0.00220307	2.00158	0.0333596	1.86939	0.0105722
225	wheat (2013)	urea	240	surface	none	64.5	266	230	8.5	13.8	1.07	1.3415	0.0223583	20.0642	0.334403	0.13415	0.00223583	2.00642	0.0334403	1.87227	0.0105983
225	wheat (2013)	urea	320	surface	none	64.5	266	230	8.5	13.8	1.07	1.3415	0.0223583	20.2041	0.336736	0.13415	0.00223583	2.02041	0.0336736	1.88626	0.010672
226	winter wheat (2008-2014 average)	none	0	none	none	65	215.5	43	7.38	17.06	0.85	0.293967	0.00489944	0.293967	0.00489944	0.0293967	0.000489944	0.0293967	0.000489944	0	0.00021911
226	winter wheat (2008-2014 average)	urea	165	subsurface	none	65	215.5	43	7.38	17.06	0.85	0.293967	0.00489944	0.285362	0.00475603	0.0293967	0.000489944	0.0285362	0.000475603	0.000860478	0.000215927
226	winter wheat (2008-2014 average)	urea	330	subsurface	none	65	215.5	43	7.38	17.06	0.85	0.293967	0.00489944	0.735294	0.0122549	0.0293967	0.000489944	0.0735294	0.00122549	0.0441327	0.000417357
226	winter wheat (2008-2014 average)	urea	471	subsurface	none	65	215.5	43	7.38	17.06	0.85	0.293967	0.00489944	1.12283	0.0187139	0.0293967	0.000489944	0.112283	0.00187139	0.0828866	0.00061173
226	winter wheat (2008-2014 average)	urea	495	subsurface	none	65	215.5	43	7.38	17.06	0.85	0.293967	0.00489944	1.40419	0.0234032	0.0293967	0.000489944	0.140419	0.00234032	0.111022	0.000756118
226	winter wheat (2008-2014 average)	OA	330	subsurface	none	65	215.5	43	7.38	17.06	0.85	0.293967	0.00489944	0.621748	0.0103625	0.0293967	0.000489944	0.0621748	0.00103625	0.0327781	0.000362471
227	winter wheat（2007）	none	0	none	none	65	230.5	43	7.38	17.06	0.85	1.80848	0.0301413	1.80848	0.0105495	0.180848	0.00301413	0.180848	0.00105495	0	0.00100985
227	winter wheat（2007）	urea	191	surface	none	65	230.5	43	7.38	17.06	0.85	1.80848	0.0301413	4.37803	0.0393849	0.180848	0.00301413	0.437803	0.00393849	0.256956	0.00156833
227	winter wheat（2007）	urea	150	surface	none	65	230.5	43	7.38	17.06	0.85	1.80848	0.0301413	2.64955	0.0087731	0.180848	0.00301413	0.264955	0.00087731	0.0841076	0.000992706
227	winter wheat（2007）	urea	75	surface	none	65	230.5	43	7.38	17.06	0.85	1.80848	0.0301413	1.9103	0.0072679	0.180848	0.00301413	0.19103	0.00072679	0.0101818	0.000980469
227	winter wheat（2007）	urea	225	surface	none	65	230.5	43	7.38	17.06	0.85	1.80848	0.0301413	4.05813	0.00789912	0.180848	0.00301413	0.405813	0.000789912	0.224966	0.000985339
227	winter wheat（2008）	none	0	none	none	65	230.5	43	7.38	17.06	0.85	0.794349	0.0132391	0.585648	0.0097608	0.0794349	0.00132391	0.0585648	0.00097608	0.02087	0.000520142
227	winter wheat（2008）	urea	191	surface	none	65	230.5	43	7.38	17.06	0.85	0.794349	0.0132391	1.33771	0.0222952	0.0794349	0.00132391	0.133771	0.00222952	0.0543363	0.00081997
227	winter wheat（2008）	urea	150	surface	none	65	230.5	43	7.38	17.06	0.85	0.794349	0.0132391	0.709936	0.0118323	0.0794349	0.00132391	0.0709936	0.00118323	0.00844126	0.000561496
227	winter wheat（2008）	urea	75	surface	none	65	230.5	43	7.38	17.06	0.85	0.794349	0.0132391	0.642338	0.0107056	0.0794349	0.00132391	0.0642338	0.00107056	0.015201	0.00053841
227	winter wheat（2008）	urea	225	surface	none	65	230.5	43	7.38	17.06	0.85	0.794349	0.0132391	3.38605	0.0564342	0.0794349	0.00132391	0.338605	0.00564342	0.25917	0.00183305
239	wheat (2011)	none	0	none	none	64.5	266	230	8.5	13.8	1.07	1.44065	0.0240109	1.44065	0.0240109	0.144065	0.00240109	0.144065	0.00240109	0	0.0010738
239	wheat (2011)	urea	80	surface	none	64.5	266	230	8.5	13.8	1.07	1.44065	0.0240109	2.82715	0.0471192	0.144065	0.00240109	0.282715	0.00471192	0.13865	0.00167235
239	wheat (2011)	urea	160	surface	none	64.5	266	230	8.5	13.8	1.07	1.44065	0.0240109	4.48259	0.0747099	0.144065	0.00240109	0.448259	0.00747099	0.304194	0.00248155
239	wheat (2011)	urea	240	surface	none	64.5	266	230	8.5	13.8	1.07	1.44065	0.0240109	6.50902	0.108484	0.144065	0.00240109	0.650902	0.0108484	0.506837	0.00351358
239	wheat (2011)	urea	320	surface	none	64.5	266	230	8.5	13.8	1.07	1.44065	0.0240109	7.4946	0.12491	0.144065	0.00240109	0.74946	0.012491	0.605395	0.00402232
239	wheat (2012)	none	0	none	none	64.5	266	230	8.5	13.8	1.07	1.32184	0.0220307	1.54023	0.0256705	0.132184	0.00220307	0.154023	0.00256705	0.0218391	0.00106973
239	wheat (2012)	urea	80	surface	none	64.5	266	230	8.5	13.8	1.07	1.32184	0.0220307	4.06572	0.0677619	0.132184	0.00220307	0.406572	0.00677619	0.274388	0.00225323
239	wheat (2012)	urea	160	surface	none	64.5	266	230	8.5	13.8	1.07	1.32184	0.0220307	4.69778	0.0782963	0.132184	0.00220307	0.469778	0.00782963	0.337594	0.00257209
239	wheat (2012)	urea	240	surface	none	64.5	266	230	8.5	13.8	1.07	1.32184	0.0220307	7.25389	0.120898	0.132184	0.00220307	0.725389	0.0120898	0.593205	0.00388609
239	wheat (2012)	urea	320	surface	none	64.5	266	230	8.5	13.8	1.07	1.32184	0.0220307	8.05167	0.134195	0.132184	0.00220307	0.805167	0.0134195	0.672984	0.00430041
239	wheat (2013)	none	0	none	none	64.5	266	230	8.5	13.8	1.07	1.32184	0.0220307	6.38403	0.1064	0.132184	0.00220307	0.638403	0.01064	0.506219	0.00343605
239	wheat (2013)	urea	80	surface	none	64.5	266	230	8.5	13.8	1.07	1.32184	0.0220307	6.14257	0.102376	0.132184	0.00220307	0.614257	0.0102376	0.482073	0.00331153
239	wheat (2013)	urea	160	surface	none	64.5	266	230	8.5	13.8	1.07	1.32184	0.0220307	20.0158	0.333596	0.132184	0.00220307	2.00158	0.0333596	1.86939	0.0105722
239	wheat (2013)	urea	240	surface	none	64.5	266	230	8.5	13.8	1.07	1.32184	0.0220307	20.0642	0.334403	0.132184	0.00220307	2.00642	0.0334403	1.87423	0.0105977
239	wheat (2013)	urea	320	surface	none	64.5	266	230	8.5	13.8	1.07	1.32184	0.0220307	20.2041	0.336736	0.132184	0.00220307	2.02041	0.0336736	1.88823	0.0106713
229	wheat 2006-2007	none	0	none	none	56.2	510.6	203	8.25	29.55	1.39	0.106007	0.00176678	0.353357	0.00628931	0.0106007	0.000176678	0.0353357	0.000628931	0.024735	0.000206584
229	wheat 2006-2007	urea	180	surface	none	56.2	510.6	203	8.25	29.55	1.39	0.106007	0.00176678	0.391645	0.0126582	0.0106007	0.000176678	0.0391645	0.00126582	0.0285638	0.000404169
229	wheat 2006-2007	urea	260	surface	none	56.2	510.6	203	8.25	29.55	1.39	0.106007	0.00176678	0.80207	0.0164021	0.0106007	0.000176678	0.080207	0.00164021	0.0696063	0.000521681
229	wheat 2006-2007	urea	360	surface	none	56.2	510.6	203	8.25	29.55	1.39	0.106007	0.00176678	1.76159	0.130392	0.0106007	0.000176678	0.176159	0.0130392	0.165558	0.00412374
230	wheat (2011)	none	0	none	none	62.5	240.5	280	8.1	10.12	0.8	0.037037	0.000617284	0.037037	0.000166667	0.0037037	6.17284e-05	0.0037037	1.66667e-05	0	2.02192e-05
230	wheat (2011)	none	0	none	none	62.5	240.5	280	8.1	10.12	0.8	0.037037	0.000617284	0.0689655	0.000333333	0.0037037	6.17284e-05	0.00689655	3.33333e-05	0.00319285	2.21845e-05
230	wheat (2011)	urea	150	surface	none	62.5	240.5	280	8.1	10.12	0.8	0.037037	0.000617284	0.185185	0.00111111	0.0037037	6.17284e-05	0.0185185	0.000111111	0.0148148	4.01946e-05
230	wheat (2011)	urea	150	surface	mulch	62.5	240.5	280	8.1	10.12	0.8	0.037037	0.000617284	0.148148	0.00266667	0.0037037	6.17284e-05	0.0148148	0.000266667	0.0111111	8.65573e-05
230	wheat (2011)	urea	300	surface	none	62.5	240.5	280	8.1	10.12	0.8	0.037037	0.000617284	0.109091	0.004	0.0037037	6.17284e-05	0.0109091	0.0004	0.00720539	0.000127988
230	wheat (2011)	urea	300	surface	mulch	62.5	240.5	280	8.1	10.12	0.8	0.037037	0.000617284	0.157895	0.0012	0.0037037	6.17284e-05	0.0157895	0.00012	0.0120858	4.26736e-05
230	wheat (2011)	OA	170	surface	none	62.5	240.5	280	8.1	10.12	0.8	0.037037	0.000617284	0.277778	0.002	0.0037037	6.17284e-05	0.0277778	0.0002	0.0240741	6.61894e-05
230	wheat (2011)	OA	170	surface	none	62.5	240.5	280	8.1	10.12	0.8	0.037037	0.000617284	0.192982	0.00244444	0.0037037	6.17284e-05	0.0192982	0.000244444	0.0155945	7.97266e-05
230	wheat (2012)	none	0	none	none	62.5	240.5	280	8.1	10.12	0.8	0.0416667	0.000694444	0.166667	0.000888889	0.00416667	6.94444e-05	0.0166667	8.88889e-05	0.0125	3.56704e-05
230	wheat (2012)	none	0	none	none	62.5	240.5	280	8.1	10.12	0.8	0.0416667	0.000694444	0.24	0.001	0.00416667	6.94444e-05	0.024	0.0001	0.0198333	3.85e-05
230	wheat (2012)	urea	150	surface	none	62.5	240.5	280	8.1	10.12	0.8	0.0416667	0.000694444	0.372093	0.00177778	0.00416667	6.94444e-05	0.0372093	0.000177778	0.0330426	6.03552e-05
230	wheat (2012)	urea	150	surface	mulch	62.5	240.5	280	8.1	10.12	0.8	0.0416667	0.000694444	0.468085	0.00366667	0.00416667	6.94444e-05	0.0468085	0.000366667	0.0426418	0.000118012
230	wheat (2012)	urea	300	surface	none	62.5	240.5	280	8.1	10.12	0.8	0.0416667	0.000694444	0.866667	0.0065	0.00416667	6.94444e-05	0.0866667	0.00065	0.0825	0.000206718
230	wheat (2012)	urea	300	surface	mulch	62.5	240.5	280	8.1	10.12	0.8	0.0416667	0.000694444	0.956522	0.00733333	0.00416667	6.94444e-05	0.0956522	0.000733333	0.0914855	0.000232938
230	wheat (2012)	OA	170	surface	none	62.5	240.5	280	8.1	10.12	0.8	0.0416667	0.000694444	0.528302	0.00466667	0.00416667	6.94444e-05	0.0528302	0.000466667	0.0486635	0.000149198
230	wheat (2012)	OA	170	surface	none	62.5	240.5	280	8.1	10.12	0.8	0.0416667	0.000694444	0.339623	0.0024	0.00416667	6.94444e-05	0.0339623	0.00024	0.0297956	7.90079e-05
230	wheat (2013)	none	0	none	none	62.5	240.5	280	8.1	10.12	0.8	0.04	0.000666667	0.04	0.000666667	0.004	6.66667e-05	0.004	6.66667e-05	0	2.98143e-05
230	wheat (2013)	none	0	none	none	62.5	240.5	280	8.1	10.12	0.8	0.04	0.000666667	0.148148	0.000666667	0.004	6.66667e-05	0.0148148	6.66667e-05	0.0108148	2.98143e-05
230	wheat (2013)	urea	150	surface	none	62.5	240.5	280	8.1	10.12	0.8	0.04	0.000666667	0.355556	0.00355556	0.004	6.66667e-05	0.0355556	0.000355556	0.0315556	0.000114396
230	wheat (2013)	urea	150	surface	mulch	62.5	240.5	280	8.1	10.12	0.8	0.04	0.000666667	0.340426	0.00533333	0.004	6.66667e-05	0.0340426	0.000533333	0.0300426	0.000169967
230	wheat (2013)	urea	300	surface	none	62.5	240.5	280	8.1	10.12	0.8	0.04	0.000666667	0.680851	0.0213333	0.004	6.66667e-05	0.0680851	0.00213333	0.0640851	0.000674948
230	wheat (2013)	urea	300	surface	mulch	62.5	240.5	280	8.1	10.12	0.8	0.04	0.000666667	0.711111	0.00533333	0.004	6.66667e-05	0.0711111	0.000533333	0.0671111	0.000169967
230	wheat (2013)	OA	170	surface	none	62.5	240.5	280	8.1	10.12	0.8	0.04	0.000666667	0.479167	0.00306667	0.004	6.66667e-05	0.0479167	0.000306667	0.0439167	9.92417e-05
230	wheat (2013)	OA	170	surface	none	62.5	240.5	280	8.1	10.12	0.8	0.04	0.000666667	0.255319	0.008	0.004	6.66667e-05	0.0255319	0.0008	0.0215319	0.000253859
232	wheat	urea	0	none	none	75.2	148.5	140	6.58	19.2	0.8	0.997191	0.0166199	0.997191	0.0166199	0.0997191	0.00166199	0.0997191	0.00166199	0	0.000743262
232	wheat	urea	240	surface	none	75.2	148.5	140	6.58	19.2	0.8	0.997191	0.0166199	11.2882	0.188137	0.0997191	0.00166199	1.12882	0.0188137	1.02911	0.0059726
232	wheat	urea	240	subsurface	none	75.2	148.5	140	6.58	19.2	0.8	0.997191	0.0166199	11.3661	0.189435	0.0997191	0.00166199	1.13661	0.0189435	1.03689	0.00601348
232	wheat	urea	240	surface	none	75.2	148.5	140	6.58	19.2	0.8	0.997191	0.0166199	10.0892	0.168153	0.0997191	0.00166199	1.00892	0.0168153	0.909198	0.00534337
232	wheat	urea	240	subsurface	none	75.2	148.5	140	6.58	19.2	0.8	0.997191	0.0166199	11.4646	0.191077	0.0997191	0.00166199	1.14646	0.0191077	1.04675	0.00606521
232	wheat	urea	240	surface	none	75.2	172.2	140	6.58	19.2	0.8	0.997191	0.0166199	9.42363	0.157061	0.0997191	0.00166199	0.942363	0.0157061	0.842644	0.00499442
232	wheat	urea	240	subsurface	none	75.2	172.2	140	6.58	19.2	0.8	0.997191	0.0166199	10.6182	0.17697	0.0997191	0.00166199	1.06182	0.017697	0.962099	0.0056209
232	wheat	urea	240	surface	none	75.2	172.2	140	6.58	19.2	0.8	0.997191	0.0166199	8.47534	0.141256	0.0997191	0.00166199	0.847534	0.0141256	0.747815	0.00449771
232	wheat	urea	240	subsurface	none	75.2	172.2	140	6.58	19.2	0.8	0.997191	0.0166199	10.9492	0.182487	0.0997191	0.00166199	1.09492	0.0182487	0.995204	0.00579463
233	wheat	none	0	none	none	75.2	210.5	350	8.1	14.5	0.9	0.0996885	0.00166147	0.0996885	0.00166147	0.00996885	0.000166147	0.00996885	0.000166147	0	7.43032e-05
233	wheat	urea	128	subsurface	none	75.2	210.5	350	8.1	14.5	0.9	0.0996885	0.00166147	0.348606	0.00581009	0.00996885	0.000166147	0.0348606	0.000581009	0.0248917	0.000191096
233	wheat	urea	325	subsurface	none	75.2	210.5	350	8.1	14.5	0.9	0.0996885	0.00166147	1.25434	0.0209056	0.00996885	0.000166147	0.125434	0.00209056	0.115465	0.000663178
234	wheat (2000-2001)	none	0	none	none	76.1	140	221	8.16	9.56	0.64	0.25	0.00260417	0.25	0.0016	0.025	0.000260417	0.025	0.00016	0	9.66525e-05
234	wheat (2000-2001)	urea	100	surface	none	76.1	140	221	8.16	9.56	0.64	0.25	0.00260417	0.383333	0.0153333	0.025	0.000260417	0.0383333	0.00153333	0.0133333	0.000491826
234	wheat (2000-2001)	urea	200	surface	none	76.1	140	221	8.16	9.56	0.64	0.25	0.00260417	1.01695	0.0133333	0.025	0.000260417	0.101695	0.00133333	0.0766949	0.000429604
234	wheat (2000-2001)	urea	300	surface	none	76.1	140	221	8.16	9.56	0.64	0.25	0.00260417	1.14754	0.0233333	0.025	0.000260417	0.114754	0.00233333	0.0897541	0.000742446
234	wheat (2000-2001)	none	0	none	none	76.1	140	221	8.16	9.56	0.64	0.25	0.00260417	0.048	0.00032	0.025	0.000260417	0.0048	3.2e-05	0.0202	8.29705e-05
234	wheat (2000-2001)	urea	100	subsurface	none	76.1	140	221	8.16	9.56	0.64	0.25	0.00260417	0.145455	0.00177778	0.025	0.000260417	0.0145455	0.000177778	0.0104545	9.97106e-05
234	wheat (2000-2001)	urea	200	subsurface	none	76.1	140	221	8.16	9.56	0.64	0.25	0.00260417	6.44068	0.253333	0.025	0.000260417	0.644068	0.0253333	0.619068	0.00801153
234	wheat (2000-2001)	urea	300	subsurface	none	76.1	140	221	8.16	9.56	0.64	0.25	0.00260417	4.91228	0.0373333	0.025	0.000260417	0.491228	0.00373333	0.466228	0.00118345
234	wheat (2001-2002)	none	0	none	none	76.1	150	221	8.16	9.56	0.64	1	0.0104167	3.75	0.01	0.1	0.00104167	0.375	0.001	0.275	0.000456626
234	wheat (2001-2002)	urea	100	surface	none	76.1	150	221	8.16	9.56	0.64	1	0.0104167	5.21739	0.04	0.1	0.00104167	0.521739	0.004	0.421739	0.0013071
234	wheat (2001-2002)	urea	200	surface	none	76.1	150	221	8.16	9.56	0.64	1	0.0104167	12.963	0.233333	0.1	0.00104167	1.2963	0.0233333	1.1963	0.007386
234	wheat (2001-2002)	urea	300	surface	none	76.1	150	221	8.16	9.56	0.64	1	0.0104167	13.1148	0.177778	0.1	0.00104167	1.31148	0.0177778	1.21148	0.00563147
234	wheat (2001-2002)	none	0	none	none	76.1	150	221	8.16	9.56	0.64	0.857143	0.00892857	1.82857	0.00568889	0.0857143	0.000892857	0.182857	0.000568889	0.0971429	0.000334788
234	wheat (2001-2002)	urea	100	subsurface	none	76.1	150	221	8.16	9.56	0.64	0.857143	0.00892857	4.52381	0.0211111	0.0857143	0.000892857	0.452381	0.00211111	0.366667	0.000724844
234	wheat (2001-2002)	urea	200	subsurface	none	76.1	150	221	8.16	9.56	0.64	0.857143	0.00892857	4.2623	0.173333	0.0857143	0.000892857	0.42623	0.0173333	0.340515	0.00548855
234	wheat (2001-2002)	urea	300	subsurface	none	76.1	150	221	8.16	9.56	0.64	0.857143	0.00892857	2.58065	0.0177778	0.0857143	0.000892857	0.258065	0.00177778	0.17235	0.000629102
237	winter wheat（2009）	none	0		none	73.6	320	114	8	23.3	1.16	0.287026	0.00478377	0.287026	0.00478377	0.0287026	0.000478377	0.0287026	0.000478377	0	0.000213937
237	winter wheat（2009）	OA	270	surface	none	73.6	320	114	8	23.3	1.16	0.287026	0.00478377	5.0079	0.083465	0.0287026	0.000478377	0.50079	0.0083465	0.472087	0.00264373
237	winter wheat（2009）	urea	180	surface	none	73.6	320	114	8	23.3	1.16	0.287026	0.00478377	4.54046	0.0756743	0.0287026	0.000478377	0.454046	0.00756743	0.425343	0.00239781
237	winter wheat（2009）	OA	180	surface	none	73.6	320	114	8	23.3	1.16	0.287026	0.00478377	4.63976	0.0773294	0.0287026	0.000478377	0.463976	0.00773294	0.435274	0.00245005
237	winter wheat（2009）	IU	180	surface	none	73.6	320	114	8	23.3	1.16	0.287026	0.00478377	1.97864	0.0329774	0.0287026	0.000478377	0.197864	0.00329774	0.169162	0.00105375
237	winter wheat（2009）	IU, OA	126	surface	none	73.6	320	114	8	23.3	1.16	0.287026	0.00478377	1.56091	0.0260152	0.0287026	0.000478377	0.156091	0.00260152	0.127388	0.000836465
235	wheat	none	0	none	none	60.1	400	436.3	6.78	20.3	2.752	0.874419	0.0145736	0.874419	0.0145736	0.0874419	0.00145736	0.0874419	0.00145736	0	0.000651753
235	wheat	urea	90	surface	none	60.1	400	436.3	6.78	20.3	2.752	0.874419	0.0145736	2.03878	0.0339797	0.0874419	0.00145736	0.203878	0.00339797	0.116436	0.00116919
235	wheat	urea	180	surface	none	60.1	400	436.3	6.78	20.3	2.752	0.874419	0.0145736	2.48235	0.0413725	0.0874419	0.00145736	0.248235	0.00413725	0.160793	0.00138711
235	wheat	urea	270	surface	none	60.1	400	436.3	6.78	20.3	2.752	0.874419	0.0145736	3.21376	0.0535627	0.0874419	0.00145736	0.321376	0.00535627	0.233934	0.00175538
235	wheat	urea	360	surface	none	60.1	400	436.3	6.78	20.3	2.752	0.874419	0.0145736	3.89801	0.0649668	0.0874419	0.00145736	0.389801	0.00649668	0.302359	0.00210549
254	wheat (2012)	none	0	none	none	80.6	340.2	300.2	7.36	35.65	2.09	0.353448	0.0058908	0.353448	0.0058908	0.0353448	0.00058908	0.0353448	0.00058908	0	0.000263445
254	wheat (2012)	urea	180	subsurface	none	80.6	340.2	300.2	7.36	35.65	2.09	0.353448	0.0058908	2.82651	0.0471084	0.0353448	0.00058908	0.282651	0.00471084	0.247306	0.0015013
254	wheat (2012)	urea	180	subsurface	none	80.6	340.2	300.2	7.36	35.65	2.09	0.353448	0.0058908	1.4359	0.0239316	0.0353448	0.00058908	0.14359	0.00239316	0.108245	0.000779374
254	wheat (2012)	OA	180	subsurface	none	80.6	340.2	300.2	7.36	35.65	2.09	0.353448	0.0058908	1.23044	0.0205074	0.0353448	0.00058908	0.123044	0.00205074	0.0876996	0.000674726
254	wheat (2013)	none	0	none	none	80.6	340.2	300.2	7.36	35.65	2.09	0.362832	0.0060472	1.15929	0.0193215	0.0362832	0.00060472	0.115929	0.00193215	0.079646	0.000640227
254	wheat (2013)	urea	180	subsurface	none	80.6	340.2	300.2	7.36	35.65	2.09	0.362832	0.0060472	2.27962	0.0379937	0.0362832	0.00060472	0.227962	0.00379937	0.191679	0.00121659
254	wheat (2013)	urea	180	subsurface	none	80.6	340.2	300.2	7.36	35.65	2.09	0.362832	0.0060472	2.08475	0.0347458	0.0362832	0.00060472	0.208475	0.00347458	0.172191	0.00111527
254	wheat (2013)	OA	180	subsurface	none	80.6	340.2	300.2	7.36	35.65	2.09	0.362832	0.0060472	1.6179	0.0269651	0.0362832	0.00060472	0.16179	0.00269651	0.125507	0.00087389
242	wheat	none	0	none	none	104.5	638	321.5	7.36	35	1.09	0.120782	0.00201303	0.214511	0.00566667	0.0120782	0.000201303	0.0214511	0.000566667	0.00937295	0.000190167
242	wheat	urea	225	surface	surface	104.5	638	321.5	7.36	35	1.09	0.120782	0.00201303	0.230384	0.0184	0.0120782	0.000201303	0.0230384	0.00184	0.0109602	0.000585331
242	wheat	urea	300	surface	surface	104.5	638	321.5	7.36	35	1.09	0.120782	0.00201303	0.298812	0.0106667	0.0120782	0.000201303	0.0298812	0.00106667	0.017803	0.000343264
243	wheat	none	0	none	none	104.5	638	284	6.05	27.8	1.81	0.464174	0.00773624	0.464174	0.00773624	0.0464174	0.000773624	0.0464174	0.000773624	0	0.000345975
243	wheat	urea	100	subsurface	surface	104.5	638	284	6.05	27.8	1.81	0.464174	0.00773624	1.13023	0.0188372	0.0464174	0.000773624	0.113023	0.00188372	0.0666058	0.000643964
243	wheat	urea	250	subsurface	surface	104.5	638	284	6.05	27.8	1.81	0.464174	0.00773624	1.99596	0.033266	0.0464174	0.000773624	0.199596	0.0033266	0.153179	0.00108003
256	wheat (2009-2010)	none	0	none	none	82.1	406.5	302.2	6.99	32	1.88	1.44792	0.0241319	1.44792	0.0241319	0.144792	0.00241319	0.144792	0.00241319	0	0.00107921
256	wheat (2009-2010)	urea	180	subsurface	none	82.1	406.5	302.2	6.99	32	1.88	1.44792	0.0241319	0.886288	0.0147715	0.144792	0.00241319	0.0886288	0.00147715	0.0561629	0.000894733
256	wheat (2009-2010)	urea	180	subsurface	none	82.1	406.5	302.2	6.99	32	1.88	1.44792	0.0241319	0.663399	0.0110566	0.144792	0.00241319	0.0663399	0.00110566	0.0784518	0.000839404
256	wheat (2009-2010)	IU	180	subsurface	none	82.1	406.5	302.2	6.99	32	1.88	1.44792	0.0241319	0.669967	0.0111661	0.144792	0.00241319	0.0669967	0.00111661	0.077795	0.000840852
256	wheat (2009-2010)	UOA	180	subsurface	none	82.1	406.5	302.2	6.99	32	1.88	1.44792	0.0241319	0.762658	0.012711	0.144792	0.00241319	0.0762658	0.0012711	0.0685258	0.000862508
256	wheat (2009-2010)	urea	240	subsurface	none	82.1	406.5	302.2	6.99	32	1.88	1.44792	0.0241319	1.04808	0.0174679	0.144792	0.00241319	0.104808	0.00174679	0.039984	0.000942061
256	wheat (2010-2011)	none	0	none	none	82.1	406.5	302.2	6.99	32	1.88	0.22093	0.00368217	0.22093	0.00368217	0.022093	0.000368217	0.022093	0.000368217	0	0.000164672
256	wheat (2010-2011)	urea	180	subsurface	none	82.1	406.5	302.2	6.99	32	1.88	0.22093	0.00368217	0.104278	0.00173797	0.022093	0.000368217	0.0104278	0.000173797	0.0116652	0.000128759
256	wheat (2010-2011)	urea	180	subsurface	none	82.1	406.5	302.2	6.99	32	1.88	0.22093	0.00368217	0.126935	0.00211558	0.022093	0.000368217	0.0126935	0.000211558	0.00939953	0.000134291
256	wheat (2010-2011)	IU	180	subsurface	none	82.1	406.5	302.2	6.99	32	1.88	0.22093	0.00368217	0.158046	0.0026341	0.022093	0.000368217	0.0158046	0.00026341	0.00628843	0.000143167
256	wheat (2010-2011)	UOA	180	subsurface	none	82.1	406.5	302.2	6.99	32	1.88	0.22093	0.00368217	0.1125	0.001875	0.022093	0.000368217	0.01125	0.0001875	0.010843	0.000130668
256	wheat (2010-2011)	urea	240	subsurface	none	82.1	406.5	302.2	6.99	32	1.88	0.22093	0.00368217	0.130102	0.00216837	0.022093	0.000368217	0.0130102	0.000216837	0.00908282	0.00013513
257	Wheat (1999)	none	0	none	none	64.8	180.8	285.5	7.9	26.7	1.4	0.761905	0.0126984	0	0	0.0761905	0.00126984	0	0
257	Wheat (1999)	urea	120	surface	none	64.8	180.8	285.5	7.9	26.7	1.4	0.761905	0.0126984	3.44828	0.0574713	0.0761905	0.00126984	0.344828	0.00574713	0.268637	0.00186123
257	Wheat (1999)	urea	240	surface	none	64.8	180.8	285.5	7.9	26.7	1.4	0.761905	0.0126984	18.3962	0.306604	0.0761905	0.00126984	1.83962	0.0306604	1.76343	0.00970397
257	Wheat (1999)	urea	360	surface	none	64.8	180.8	285.5	7.9	26.7	1.4	0.761905	0.0126984	26.0188	0.433647	0.0761905	0.00126984	2.60188	0.0433647	2.52569	0.013719
257	Wheat (2000)	none	0	none	none	64.8	180.8	285.5	7.9	26.7	1.4	1.78571	0.0297619	0	0	0.178571	0.00297619	0	0
257	Wheat (2000)	urea	120	surface	none	64.8	180.8	285.5	7.9	26.7	1.4	1.78571	0.0297619	0.977654	0.0162942	0.178571	0.00297619	0.0977654	0.00162942	0.0808061	0.00107297
257	Wheat (2000)	urea	240	surface	none	64.8	180.8	285.5	7.9	26.7	1.4	1.78571	0.0297619	9.6875	0.161458	0.178571	0.00297619	0.96875	0.0161458	0.790179	0.00519178
257	Wheat (2000)	urea	360	surface	none	64.8	180.8	285.5	7.9	26.7	1.4	1.78571	0.0297619	19.5815	0.326358	0.178571	0.00297619	1.95815	0.0326358	1.77958	0.0103632
260	wheat (2000-2001)	none	0	none	none	65.5	174	185.5	8	21.4	1.17	6.58228	0.109705	6.58228	0.109705	0.658228	0.0109705	0.658228	0.0109705	0	0.00490614
260	wheat (2000-2001)	urea	98	surface	none	65.5	152.8	185.5	8	21.4	1.17	6.58228	0.109705	7.70713	0.128452	0.658228	0.0109705	0.770713	0.0128452	0.112485	0.00534182
260	wheat (2000-2001)	urea	300	surface	none	65.5	148.8	185.5	8	21.4	1.17	6.58228	0.109705	45.5056	0.758427	0.658228	0.0109705	4.55056	0.0758427	3.89233	0.0242332
260	wheat (2002-2003)	none	0	none	none	65.5	174	185.5	8	21.4	1.17	10.4839	0.174731	13.3065	0.221774	1.04839	0.0174731	1.33065	0.0221774	0.282258	0.00892831
260	wheat (2002-2003)	urea	66	surface	none	65.5	152.8	185.5	8	21.4	1.17	10.4839	0.174731	13.1818	0.219697	1.04839	0.0174731	1.31818	0.0219697	0.269795	0.00887681
260	wheat (2002-2003)	urea	300	surface	none	65.5	148.8	185.5	8	21.4	1.17	10.4839	0.174731	20.0862	0.33477	1.04839	0.0174731	2.00862	0.033477	0.960234	0.0119416
262	wheat	none	0	none	none	104.6	158	190.2	8.3	8.8	0.6	0.267913	0.00446521	0.267913	0.00446521	0.0267913	0.000446521	0.0267913	0.000446521	0	0.00019969
262	wheat	urea	130	surface	none	104.6	158	190.2	8.3	8.8	0.6	0.267913	0.00446521	1.39526	0.0114943	0.0267913	0.000446521	0.139526	0.00114943	0.112734	0.000389943
262	wheat	urea	130	surface	none	104.6	213	190.2	8.3	8.8	0.6	0.267913	0.00446521	2.84842	0.0214559	0.0267913	0.000446521	0.284842	0.00214559	0.258051	0.000693034
262	wheat	urea	130	surface	none	104.6	167	190.2	8.3	8.8	0.6	0.267913	0.00446521	2.197	0.0333333	0.0267913	0.000446521	0.2197	0.00333333	0.192908	0.00106351
262	wheat	urea	130	surface	none	104.6	187	190.2	8.3	8.8	0.6	0.267913	0.00446521	4.71169	0.0642202	0.0267913	0.000446521	0.471169	0.00642202	0.444378	0.00203572
246	winter wheat& summer maize	urea	645	surface	none	102	450	211	8.85	10.9	0.63	0.911504	0.0151917	8.97261	0.149543	0.0911504	0.00151917	0.897261	0.0149543	0.80611	0.00475332
246	winter wheat& summer maize	urea	465	surface	none	102	450	211	8.85	10.9	0.63	0.911504	0.0151917	3.14704	0.0524507	0.0911504	0.00151917	0.314704	0.00524507	0.223554	0.00172681
246	winter wheat& summer maize	urea	285	surface	none	102	450	211	8.85	10.9	0.63	0.911504	0.0151917	1.75219	0.0292032	0.0911504	0.00151917	0.175219	0.00292032	0.0840686	0.00104097
226	summer maize(2008-2014 average)	none	0	none	none	91	380.5	43	7.38	17.06	0.85	0.293967	0.00489944	0.293967	0.00489944	0.0293967	0.000489944	0.0293967	0.000489944	0	0.00021911
226	summer maize(2008-2014 average)	urea	165	subsurface	none	91	380.5	43	7.38	17.06	0.85	0.293967	0.00489944	0.285362	0.00475603	0.0293967	0.000489944	0.0285362	0.000475603	0.000860478	0.000215927
226	summer maize(2008-2014 average)	urea	330	subsurface	none	91	380.5	43	7.38	17.06	0.85	0.293967	0.00489944	0.735294	0.0122549	0.0293967	0.000489944	0.0735294	0.00122549	0.0441327	0.000417357
226	summer maize(2008-2014 average)	urea	471	subsurface	none	91	380.5	43	7.38	17.06	0.85	0.293967	0.00489944	1.12283	0.0187139	0.0293967	0.000489944	0.112283	0.00187139	0.0828866	0.00061173
226	summer maize(2008-2014 average)	urea	495	subsurface	none	91	380.5	43	7.38	17.06	0.85	0.293967	0.00489944	1.40419	0.0234032	0.0293967	0.000489944	0.140419	0.00234032	0.111022	0.000756118
226	summer maize(2008-2014 average)	OA	330	subsurface	none	91	380.5	43	7.38	17.06	0.85	0.293967	0.00489944	0.621748	0.0103625	0.0293967	0.000489944	0.0621748	0.00103625	0.0327781	0.000362471

## Sheet: Maize AEP
																				AEP
							Driving factors					yield scaled emission (kg N /Mg grains)				Eutrophication potential (PO4-eq./ /Mg grains)				effect size
Id	Crop type	Fertilizer type	N rate	Application depth	Amendments	T	P	clay (g/kg)	pH	SOM (g/kg)	N (g/kg)	CK	SD	Treat	SD	CK	SD	Treat	SD	mean	SD
227	summer maize（2008）	none	0	none	none	91	375.8	43	7.38	17.06	0.85	0.0345369	0.000575615	0.0188131	0.000177994	0.00345369	5.75615e-05	0.00188131	1.77994e-05	0.00157238	1.90529e-05
227	summer maize（2008）	urea	280	surface	none	91	375.8	43	7.38	17.06	0.85	0.0345369	0.000575615	0.0163361	6.35353e-05	0.00345369	5.75615e-05	0.00163361	6.35353e-06	0.00182008	1.83131e-05
227	summer maize（2008）	urea	180	surface	none	91	375.8	43	7.38	17.06	0.85	0.0345369	0.000575615	0.0411946	0.000223256	0.00345369	5.75615e-05	0.00411946	2.23256e-05	0.000665775	1.95237e-05
227	summer maize（2008）	urea	90	surface	none	91	375.8	43	7.38	17.06	0.85	0.0345369	0.000575615	0.0326975	0.000304183	0.00345369	5.75615e-05	0.00326975	3.04183e-05	0.000183934	2.05879e-05
227	summer maize（2008）	urea	270	surface	none	91	375.8	43	7.38	17.06	0.85	0.0345369	0.000575615	0.0645578	0.000241721	0.00345369	5.75615e-05	0.00645578	2.41721e-05	0.00300209	1.97424e-05
227	summer maize（2009）	none	0	none	none	91	375.8	43	7.38	17.06	0.85	0.0345369	0.000575615	0.00898069	0.000149678	0.00345369	5.75615e-05	0.000898069	1.49678e-05	0.00255562	1.88079e-05
227	summer maize（2009）	urea	280	surface	none	91	375.8	43	7.38	17.06	0.85	0.0345369	0.000575615	0.0367089	0.000611814	0.00345369	5.75615e-05	0.00367089	6.11814e-05	0.000217197	2.65641e-05
227	summer maize（2009）	urea	180	surface	none	91	375.8	43	7.38	17.06	0.85	0.0345369	0.000575615	0.0272851	0.000454752	0.00345369	5.75615e-05	0.00272851	4.54752e-05	0.000725176	2.31977e-05
227	summer maize（2009）	urea	90	surface	none	91	375.8	43	7.38	17.06	0.85	0.0345369	0.000575615	0.0123495	0.000205825	0.00345369	5.75615e-05	0.00123495	2.05825e-05	0.00221874	1.93312e-05
227	summer maize（2009）	urea	270	surface	none	91	375.8	43	7.38	17.06	0.85	0.0345369	0.000575615	0.0306364	0.000510607	0.00345369	5.75615e-05	0.00306364	5.10607e-05	0.000390049	2.43321e-05
228	maize-wheat	none	0		none	13	375.8	43	7.38	17.06	0.85	1.15217	0.0192029	1.15217	0.0192029	0.115217	0.00192029	0.115217	0.00192029	0	0.00085878
228	maize-wheat	urea	165	surface	none	13	375.8	43	7.38	17.06	0.85	1.15217	0.0192029	0.96124	0.0160207	0.115217	0.00192029	0.096124	0.00160207	0.0190934	0.000790831
228	maize-wheat	urea	330	surface	none	13	375.8	43	7.38	17.06	0.85	1.15217	0.0192029	2.10417	0.0350694	0.115217	0.00192029	0.210417	0.00350694	0.0951993	0.00126436
228	maize-wheat	urea	495	surface	none	13	375.8	43	7.38	17.06	0.85	1.15217	0.0192029	2.775	0.04625	0.115217	0.00192029	0.2775	0.004625	0.162283	0.00158361
229	maize 2005	none	0	none	none	74.3	720.8	203	8.25	29.55	1.39	1.70354	0.0283923	1.70354	0.0151874	0.170354	0.00283923	0.170354	0.00151874	0	0.00101822
229	maize 2005	urea	180	surface	none	74.3	720.8	203	8.25	29.55	1.39	1.70354	0.0283923	4.10872	0.503876	0.170354	0.00283923	0.410872	0.0503876	0.240518	0.0159592
229	maize 2005	urea	260	surface	none	74.3	720.8	203	8.25	29.55	1.39	1.70354	0.0283923	6.65842	0.16303	0.170354	0.00283923	0.665842	0.016303	0.495488	0.00523307
229	maize 2005	urea	360	surface	none	74.3	720.8	203	8.25	29.55	1.39	1.70354	0.0283923	10.5882	0.0852071	0.170354	0.00283923	1.05882	0.00852071	0.88847	0.00284014
229	maize 2006	none	0	none	none	74.3	720.8	203	8.25	29.55	1.39	1.20087	0.0200146	1.20087	0.0144357	0.120087	0.00200146	0.120087	0.00144357	0	0.000780367
229	maize 2006	urea	180	surface	none	74.3	720.8	203	8.25	29.55	1.39	1.20087	0.0200146	2.04056	0.0441701	0.120087	0.00200146	0.204056	0.00441701	0.0839684	0.00153349
229	maize 2006	urea	260	surface	none	74.3	720.8	203	8.25	29.55	1.39	1.20087	0.0200146	4.3956	0.172662	0.120087	0.00200146	0.43956	0.0172662	0.319473	0.00549661
229	maize 2006	urea	360	surface	none	74.3	720.8	203	8.25	29.55	1.39	1.20087	0.0200146	8.98182	0.167458	0.120087	0.00200146	0.898182	0.0167458	0.778094	0.00533316
229	maize 2007	none	0	none	none	74.3	720.8	203	8.25	29.55	1.39	0.078534	0.0013089	0.078534	0.0013986	0.0078534	0.00013089	0.0078534	0.00013986	0	6.05748e-05
229	maize 2007	urea	180	surface	none	74.3	720.8	203	8.25	29.55	1.39	0.078534	0.0013089	0.151515	0.00252101	0.0078534	0.00013089	0.0151515	0.000252101	0.00729811	8.9826e-05
229	maize 2007	urea	260	surface	none	74.3	720.8	203	8.25	29.55	1.39	0.078534	0.0013089	0.32368	0.00673759	0.0078534	0.00013089	0.032368	0.000673759	0.0245146	0.000217045
229	maize 2007	urea	360	surface	none	74.3	720.8	203	8.25	29.55	1.39	0.078534	0.0013089	0.670017	0.0208333	0.0078534	0.00013089	0.0670017	0.00208333	0.0591483	0.000660107
230	maize (2011)	none	0	none	none	75	240.5	280	8.1	10.12	0.8	0.04	0.000666667	0.259259	0.00233333	0.004	6.66667e-05	0.0259259	0.000233333	0.0219259	7.6739e-05
230	maize (2011)	none	0	none	none	75	350.6	280	8.1	10.12	0.8	0.04	0.000666667	0.32	0.00355556	0.004	6.66667e-05	0.032	0.000355556	0.028	0.000114396
230	maize (2011)	urea	130	surface	none	75	350.6	280	8.1	10.12	0.8	0.04	0.000666667	4.26154	0.0461667	0.004	6.66667e-05	0.426154	0.00461667	0.422154	0.00146007
230	maize (2011)	urea	130	surface	mulch	75	350.6	280	8.1	10.12	0.8	0.04	0.000666667	3.61017	0.0236667	0.004	6.66667e-05	0.361017	0.00236667	0.357017	0.000748703
230	maize (2011)	urea	260	surface	none	75	350.6	280	8.1	10.12	0.8	0.04	0.000666667	6.36923	0.092	0.004	6.66667e-05	0.636923	0.0092	0.632923	0.00290937
230	maize (2011)	urea	260	surface	mulch	75	350.6	280	8.1	10.12	0.8	0.04	0.000666667	7.50633	0.131778	0.004	6.66667e-05	0.750633	0.0131778	0.746633	0.00416723
230	maize (2011)	OA	140	surface	none	75	350.6	280	8.1	10.12	0.8	0.04	0.000666667	3.23404	0.0337778	0.004	6.66667e-05	0.323404	0.00337778	0.319404	0.00106836
230	maize (2011)	OA	140	surface	none	75	350.6	280	8.1	10.12	0.8	0.04	0.000666667	3.50649	0.036	0.004	6.66667e-05	0.350649	0.0036	0.346649	0.00113862
230	maize (2012)	none	0	none	none	75	350.6	280	8.1	10.12	0.8	0.025641	0.00042735	0.923077	0.006	0.0025641	4.2735e-05	0.0923077	0.0006	0.0897436	0.000190217
230	maize (2012)	none	0	none	none	75	350.6	280	8.1	10.12	0.8	0.025641	0.00042735	0.6	0.003	0.0025641	4.2735e-05	0.06	0.0003	0.0574359	9.5826e-05
230	maize (2012)	urea	130	surface	none	75	350.6	280	8.1	10.12	0.8	0.025641	0.00042735	1.7377	0.0235556	0.0025641	4.2735e-05	0.17377	0.00235556	0.171206	0.000745015
230	maize (2012)	urea	130	surface	mulch	75	350.6	280	8.1	10.12	0.8	0.025641	0.00042735	1.56923	0.017	0.0025641	4.2735e-05	0.156923	0.0017	0.154359	0.000537757
230	maize (2012)	urea	260	surface	none	75	350.6	280	8.1	10.12	0.8	0.025641	0.00042735	4.64384	0.0565	0.0025641	4.2735e-05	0.464384	0.00565	0.461819	0.00178674
230	maize (2012)	urea	260	surface	mulch	75	350.6	280	8.1	10.12	0.8	0.025641	0.00042735	5.75342	0.0933333	0.0025641	4.2735e-05	0.575342	0.00933333	0.572778	0.00295149
230	maize (2012)	OA	140	surface	none	75	350.6	280	8.1	10.12	0.8	0.025641	0.00042735	1.73737	0.016381	0.0025641	4.2735e-05	0.173737	0.0016381	0.171173	0.000518187
230	maize (2012)	OA	140	surface	none	75	350.6	280	8.1	10.12	0.8	0.025641	0.00042735	1.86957	0.0191111	0.0025641	4.2735e-05	0.186957	0.00191111	0.184392	0.000604497
230	maize (2013)	none	0	none	none	75	350.6	280	8.1	10.12	0.8	0.025641	0.00042735	0.166667	0.00177778	0.0025641	4.2735e-05	0.0166667	0.000177778	0.0141026	5.78198e-05
230	maize (2013)	none	0	none	none	75	350.6	280	8.1	10.12	0.8	0.025641	0.00042735	0.42	0.00466667	0.0025641	4.2735e-05	0.042	0.000466667	0.0394359	0.000148191
230	maize (2013)	urea	130	surface	none	75	350.6	280	8.1	10.12	0.8	0.025641	0.00042735	1.84746	0.0181667	0.0025641	4.2735e-05	0.184746	0.00181667	0.182182	0.000574639
230	maize (2013)	urea	130	surface	mulch	75	350.6	280	8.1	10.12	0.8	0.025641	0.00042735	1.72857	0.0268889	0.0025641	4.2735e-05	0.172857	0.00268889	0.170293	0.000850409
230	maize (2013)	urea	260	surface	none	75	350.6	280	8.1	10.12	0.8	0.025641	0.00042735	2.61429	0.061	0.0025641	4.2735e-05	0.261429	0.0061	0.258864	0.00192904
230	maize (2013)	urea	260	surface	mulch	75	350.6	280	8.1	10.12	0.8	0.025641	0.00042735	3.08451	0.073	0.0025641	4.2735e-05	0.308451	0.0073	0.305887	0.0023085
230	maize (2013)	OA	140	surface	none	75	350.6	280	8.1	10.12	0.8	0.025641	0.00042735	1.97561	0.027	0.0025641	4.2735e-05	0.197561	0.0027	0.194997	0.000853922
230	maize (2013)	OA	140	surface	none	75	350.6	280	8.1	10.12	0.8	0.025641	0.00042735	1.1519	0.0202222	0.0025641	4.2735e-05	0.11519	0.00202222	0.112626	0.000639626
231	maize wheat (2001-2002)	none	0	none	none	69.2	536	460	8.6	11.3	1.1	0.075188	0.0037594	0.075188	0.00125313	0.0075188	0.00037594	0.0075188	0.000125313	0	0.000125313
231	maize wheat (2001-2002)	urea	200	subsurface	none	69.2	536	460	8.6	11.3	1.1	0.075188	0.0037594	0.200582	0.00334303	0.0075188	0.00037594	0.0200582	0.000334303	0.0125394	0.000159088
231	maize wheat (2001-2002)	urea	400	subsurface	none	69.2	536	460	8.6	11.3	1.1	0.075188	0.0037594	3.27022	0.0545037	0.0075188	0.00037594	0.327022	0.00545037	0.319504	0.00172765
231	maize wheat (2001-2002)	urea	800	subsurface	none	69.2	536	460	8.6	11.3	1.1	0.075188	0.0037594	12.1673	0.202788	0.0075188	0.00037594	1.21673	0.0202788	1.20921	0.00641383
231	maize wheat (2002-2003)	none	0	none	none	69.2	536	460	8.6	11.3	1.1	0.0775194	0.00387597	0.0930233	0.00155039	0.00775194	0.000387597	0.00930233	0.000155039	0.00155039	0.000132011
231	maize wheat (2002-2003)	urea	200	subsurface	none	69.2	536	460	8.6	11.3	1.1	0.0775194	0.00387597	0.630252	0.0105042	0.00775194	0.000387597	0.0630252	0.00105042	0.0552733	0.000354064
231	maize wheat (2002-2003)	urea	400	subsurface	none	69.2	536	460	8.6	11.3	1.1	0.0775194	0.00387597	4.14041	0.0690069	0.00775194	0.000387597	0.414041	0.00690069	0.406289	0.00218563
231	maize wheat (2002-2003)	urea	800	subsurface	none	69.2	536	460	8.6	11.3	1.1	0.0775194	0.00387597	11.2062	0.18677	0.00775194	0.000387597	1.12062	0.018677	1.11287	0.00590747
231	maize wheat (2003-2004)	none	0	none	none	69.2	536	460	8.6	11.3	1.1	0.0712251	0.00356125	0.156695	0.00261159	0.00712251	0.000356125	0.0156695	0.000261159	0.00854701	0.000139653
231	maize wheat (2003-2004)	urea	200	subsurface	none	69.2	536	460	8.6	11.3	1.1	0.0712251	0.00356125	1.11336	0.018556	0.00712251	0.000356125	0.111336	0.0018556	0.104214	0.000597501
231	maize wheat (2003-2004)	urea	400	subsurface	none	69.2	536	460	8.6	11.3	1.1	0.0712251	0.00356125	7.59494	0.126582	0.00712251	0.000356125	0.759494	0.0126582	0.752371	0.00400447
231	maize wheat (2003-2004)	urea	800	subsurface	none	69.2	536	460	8.6	11.3	1.1	0.0712251	0.00356125	11.0687	0.184478	0.00712251	0.000356125	1.10687	0.0184478	1.09975	0.00583481
233	maize maize	urea	158	subsurface	none	102.1	450.5	350	8.1	14.5	0.9	0.0996885	0.00166147	0.404494	0.00674157	0.00996885	0.000166147	0.0404494	0.000674157	0.0304806	0.000219566
233	maize maize	urea	263	subsurface	none	102.1	450.5	350	8.1	14.5	0.9	0.0996885	0.00166147	1.08471	0.0180784	0.00996885	0.000166147	0.108471	0.00180784	0.0985017	0.000574099
234	maize (2001)	none	0	none	none	101.8	385	221	8.16	9.56	0.64	0.25	0.00260417	2.12069	0.0273333	0.025	0.000260417	0.212069	0.00273333	0.187069	0.00086827
234	maize (2001)	urea	100	surface	none	101.8	385	221	8.16	9.56	0.64	0.25	0.00260417	10.9302	0.208889	0.025	0.000260417	1.09302	0.0208889	1.06802	0.00660616
234	maize (2001)	urea	200	surface	none	101.8	385	221	8.16	9.56	0.64	0.25	0.00260417	10.1053	0.128	0.025	0.000260417	1.01053	0.0128	0.985526	0.00404855
234	maize (2001)	urea	300	surface	none	101.8	385	221	8.16	9.56	0.64	0.25	0.00260417	16.1364	0.105185	0.025	0.000260417	1.61364	0.0105185	1.58864	0.00332727
234	maize (2001)	none	0	none	none	101.8	385	221	8.16	9.56	0.64	0.25	0.00260417	2.88679	0.0927273	0.025	0.000260417	0.288679	0.00927273	0.263679	0.00293345
234	maize (2001)	urea	100	subsurface	none	101.8	385	221	8.16	9.56	0.64	0.25	0.00260417	11.9048	0.111111	0.025	0.000260417	1.19048	0.0111111	1.16548	0.00351461
234	maize (2001)	urea	200	subsurface	none	101.8	385	221	8.16	9.56	0.64	0.25	0.00260417	15.3846	0.133333	0.025	0.000260417	1.53846	0.0133333	1.51346	0.00421717
234	maize (2001)	urea	300	subsurface	none	101.8	385	221	8.16	9.56	0.64	0.25	0.00260417	19.6429	0.1375	0.025	0.000260417	1.96429	0.01375	1.93929	0.00434891
234	maize (2002)	none	0	none	none	101.8	161	221	8.16	9.56	0.64	0.27907	0.00290698	1.53023	0.0219333	0.027907	0.000290698	0.153023	0.00219333	0.125116	0.000699658
234	maize (2002)	urea	100	surface	none	101.8	161	221	8.16	9.56	0.64	0.27907	0.00290698	0.923077	0.04	0.027907	0.000290698	0.0923077	0.004	0.0644007	0.00126825
234	maize (2002)	urea	200	surface	none	101.8	161	221	8.16	9.56	0.64	0.27907	0.00290698	7.41573	0.0628571	0.027907	0.000290698	0.741573	0.00628571	0.713666	0.00198984
234	maize (2002)	urea	300	surface	none	101.8	161	221	8.16	9.56	0.64	0.27907	0.00290698	15	0.146667	0.027907	0.000290698	1.5	0.0146667	1.47209	0.00463892
234	maize (2002)	none	0	none	none	101.8	161	221	8.16	9.56	0.64	0.324324	0.00337838	1.48919	0.00734667	0.0324324	0.000337838	0.148919	0.000734667	0.116486	0.000255709
234	maize (2002)	urea	100	subsurface	none	101.8	161	221	8.16	9.56	0.64	0.324324	0.00337838	4.09836	0.0208333	0.0324324	0.000337838	0.409836	0.00208333	0.377404	0.000667414
234	maize (2002)	urea	200	subsurface	none	101.8	161	221	8.16	9.56	0.64	0.324324	0.00337838	7.66234	0.0786667	0.0324324	0.000337838	0.766234	0.00786667	0.733801	0.00248995
234	maize (2002)	urea	300	subsurface	none	101.8	161	221	8.16	9.56	0.64	0.324324	0.00337838	12.6923	0.0733333	0.0324324	0.000337838	1.26923	0.00733333	1.2368	0.00232146
236	maize1	none	0	none	none	101.8	560.5	160	7.3	6.6	0.811	1.83252	0.0418689	1.83252	0.0419444	0.183252	0.00418689	0.183252	0.00419444	0	0.00187412
236	maize1	urea	200	surface	none	101.8	560.5	160	7.3	6.6	0.811	1.83252	0.0418689	7.0831	0.252353	0.183252	0.00418689	0.70831	0.0252353	0.525058	0.00808919
236	maize1	OA	100	surface	none	101.8	560.5	160	7.3	6.6	0.811	1.83252	0.0418689	2.78774	0.104742	0.183252	0.00418689	0.278774	0.0104742	0.0955216	0.00356704
236	maize1	urea	200	subsurface	none	101.8	560.5	160	7.3	6.6	0.811	1.83252	0.0418689	2.77097	0.144872	0.183252	0.00418689	0.277097	0.0144872	0.0938442	0.00476874
236	maize1	OA	100	subsurface	none	101.8	560.5	160	7.3	6.6	0.811	1.83252	0.0418689	2.56693	0.139093	0.183252	0.00418689	0.256693	0.0139093	0.0734405	0.00459347
236	maize1	urea	200	surface	none	101.8	560.5	160	7.3	6.6	0.811	1.83252	0.0418689	0	0	0.183252	0.00418689	0	0
236	maize1	OA	100	surface	none	101.8	560.5	160	7.3	6.6	0.811	1.83252	0.0418689	0	0	0.183252	0.00418689	0	0
236	maize1	urea	200	subsurface	none	101.8	560.5	160	7.3	6.6	0.811	1.83252	0.0418689	0	0	0.183252	0.00418689	0	0
236	maize1	OA	100	subsurface	none	101.8	560.5	160	7.3	6.6	0.811	1.83252	0.0418689	0	0	0.183252	0.00418689	0	0
236	maize2	urea	200	surface	none	101.8	560.5	160	7.3	6.6	0.811	1.83252	0.0418689	4.48463	0.26153	0.183252	0.00418689	0.448463	0.026153	0.265211	0.00837562
236	maize2	OA	100	surface	none	101.8	560.5	160	7.3	6.6	0.811	1.83252	0.0418689	2.81434	0.138667	0.183252	0.00418689	0.281434	0.0138667	0.0981818	0.00458055
236	maize2	urea	200	subsurface	none	101.8	560.5	160	7.3	6.6	0.811	1.83252	0.0418689	1.89067	0.0834667	0.183252	0.00418689	0.189067	0.00834667	0.00581432	0.00295291
236	maize2	OA	100	subsurface	none	101.8	560.5	160	7.3	6.6	0.811	1.83252	0.0418689	1.67318	0.101371	0.183252	0.00418689	0.167318	0.0101371	0.0159345	0.00346829
236	maize2	urea	200	surface	none	101.8	560.5	160	7.3	6.6	0.811	1.83252	0.0418689	0	0	0.183252	0.00418689	0	0
236	maize2	OA	100	surface	none	101.8	560.5	160	7.3	6.6	0.811	1.83252	0.0418689	0	0	0.183252	0.00418689	0	0
236	maize2	urea	200	subsurface	none	101.8	560.5	160	7.3	6.6	0.811	1.83252	0.0418689	0	0	0.183252	0.00418689	0	0
236	maize2	OA	100	subsurface	none	101.8	560.5	160	7.3	6.6	0.811	1.83252	0.0418689	0	0	0.183252	0.00418689	0	0
237	summer maize（2009）	none	0	none	none	101.8	600	114	8	23.3	1.16	0.152742	0.0025457	5.88056	0.0980093	0.0152742	0.00025457	0.588056	0.00980093	0.572781	0.00310037
237	summer maize（2009）	urea	330	surface	none	101.8	600	114	8	23.3	1.16	0.152742	0.0025457	19.2999	0.321665	0.0152742	0.00025457	1.92999	0.0321665	1.91472	0.0101723
237	summer maize（2009）	urea	240	surface	none	101.8	600	114	8	23.3	1.16	0.152742	0.0025457	8.41187	0.140198	0.0152742	0.00025457	0.841187	0.0140198	0.825913	0.00443417
237	summer maize（2009）	urea	240	subsurface	none	101.8	600	114	8	23.3	1.16	0.152742	0.0025457	8.50315	0.141719	0.0152742	0.00025457	0.850315	0.0141719	0.835041	0.00448228
237	summer maize（2009）	IU	240	surface	none	101.8	600	114	8	23.3	1.16	0.152742	0.0025457	6.95713	0.115952	0.0152742	0.00025457	0.695713	0.0115952	0.680439	0.00366761
237	summer maize（2009）	IU	168	surface	none	101.8	600	114	8	23.3	1.16	0.152742	0.0025457	4.43698	0.0739496	0.0152742	0.00025457	0.443698	0.00739496	0.428424	0.00233988
238	maize	OCF	135	surface	none	103.1	680.5	240	8.06	15.4	0.93	0.961783	0.0160297	2.42511	0.0404185	0.0961783	0.00160297	0.242511	0.00404185	0.146333	0.00137499
238	maize	urea	135	surface	none	103.1	680.5	240	8.06	15.4	0.93	0.961783	0.0160297	2.6931	0.044885	0.0961783	0.00160297	0.26931	0.0044885	0.173132	0.00150719
238	maize	IU	135	surface	none	103.1	680.5	240	8.06	15.4	0.93	0.961783	0.0160297	1.74314	0.0290524	0.0961783	0.00160297	0.174314	0.00290524	0.078136	0.00104928
238	maize	IU	135	surface	none	103.1	680.5	240	8.06	15.4	0.93	0.961783	0.0160297	2.21117	0.0368528	0.0961783	0.00160297	0.221117	0.00368528	0.124938	0.00127086
238	maize	IU	135	surface	none	103.1	680.5	240	8.06	15.4	0.93	0.961783	0.0160297	1.46464	0.0244107	0.0961783	0.00160297	0.146464	0.00244107	0.0502857	0.00092349
238	maize	IU	135	surface	none	103.1	680.5	240	8.06	15.4	0.93	0.961783	0.0160297	2.15449	0.0359082	0.0961783	0.00160297	0.215449	0.00359082	0.119271	0.00124352
247	spring maize	none	0	none	none	43.6	142.6	150	7.9	11.6	0.4	0.657767	0.0109628	0.657767	0.0109628	0.0657767	0.00109628	0.0657767	0.00109628	0	0.00049027
247	spring maize	urea	80	surface	none	43.6	142.6	150	7.9	11.6	0.4	0.657767	0.0109628	1.08998	0.0181663	0.0657767	0.00109628	0.108998	0.00181663	0.0432213	0.000670968
247	spring maize	urea	160	surface	none	43.6	142.6	150	7.9	11.6	0.4	0.657767	0.0109628	1.43284	0.0238806	0.0657767	0.00109628	0.143284	0.00238806	0.0775069	0.000830943
247	spring maize	urea	240	surface	none	43.6	142.6	150	7.9	11.6	0.4	0.657767	0.0109628	1.81955	0.0303258	0.0657767	0.00109628	0.181955	0.00303258	0.116178	0.00101972
247	spring maize	urea	360	surface	none	43.6	142.6	150	7.9	11.6	0.4	0.657767	0.0109628	1.95839	0.0326399	0.0657767	0.00109628	0.195839	0.00326399	0.130062	0.00108883
248	maize	urea	200	surface	none	112.3	384	75	8.4	6.5	0.8	0.493554	0.00822591	0.274796	0.00457994	0.0493554	0.000822591	0.0274796	0.000457994	0.0218758	0.000297727
248	maize	urea	200	surface	mulch	112.3	384	75	8.4	6.5	0.8	0.493554	0.00822591	0.396531	0.00660885	0.0493554	0.000822591	0.0396531	0.000660885	0.0097023	0.00033368
248	maize	urea	250	surface	none	112.3	384	75	8.4	6.5	0.8	0.493554	0.00822591	0.337579	0.00562632	0.0493554	0.000822591	0.0337579	0.000562632	0.0155975	0.000315152
248	maize	urea	250	surface	mulch	112.3	384	75	8.4	6.5	0.8	0.493554	0.00822591	0.167339	0.00278898	0.0493554	0.000822591	0.0167339	0.000278898	0.0326215	0.000274671
250	spring maize	urea	525	subsurface	none	65.3	360.8	210.2	8.04	16.55	0.91	1.10437	0.0184061	4.71479	0.0785798	0.110437	0.00184061	0.471479	0.00785798	0.361042	0.00255217
250	spring maize	urea	450	subsurface	none	65.3	360.8	210.2	8.04	16.55	0.91	1.10437	0.0184061	3.72418	0.0620697	0.110437	0.00184061	0.372418	0.00620697	0.261981	0.0020473
250	spring maize	urea	450	subsurface	none	65.3	360.8	210.2	8.04	16.55	0.91	1.10437	0.0184061	3.88174	0.0646956	0.110437	0.00184061	0.388174	0.00646956	0.277737	0.00212704
250	spring maize	OA	423	subsurface	none	65.3	360.8	210.2	8.04	16.55	0.91	1.10437	0.0184061	2.18889	0.0364815	0.110437	0.00184061	0.218889	0.00364815	0.108452	0.00129216
250	spring maize	IU	180	subsurface	none	65.3	360.8	210.2	8.04	16.55	0.91	1.10437	0.0184061	2.44956	0.040826	0.110437	0.00184061	0.244956	0.0040826	0.134519	0.00141617
257	maize (1999)	none	0	none	none	74.5	230.2	285.5	7.9	26.7	1.4	0.761905	0.0126984	0.761905	0.0126984	0.0761905	0.00126984	0.0761905	0.00126984	0	0.00056789
257	maize (1999)	urea	120	surface	none	74.5	230.2	285.5	7.9	26.7	1.4	0.761905	0.0126984	4.28571	0.0714286	0.0761905	0.00126984	0.428571	0.00714286	0.352381	0.00229419
257	maize (1999)	urea	240	surface	none	74.5	230.2	285.5	7.9	26.7	1.4	0.761905	0.0126984	8.83721	0.147287	0.0761905	0.00126984	0.883721	0.0147287	0.80753	0.0046749
257	maize (1999)	urea	360	surface	none	74.5	230.2	285.5	7.9	26.7	1.4	0.761905	0.0126984	3.33333	0.0555556	0.0761905	0.00126984	0.333333	0.00555556	0.257143	0.00180213
257	maize (2000)	none	0	none	none	74.5	230.2	285.5	7.9	26.7	1.4	1.78571	0.0297619	0	0	0.178571	0.00297619	0	0
257	maize (2000)	urea	120	surface	none	74.5	230.2	285.5	7.9	26.7	1.4	1.78571	0.0297619	9.85915	0.164319	0.178571	0.00297619	0.985915	0.0164319	0.807344	0.00528078
257	maize (2000)	urea	240	surface	none	74.5	230.2	285.5	7.9	26.7	1.4	1.78571	0.0297619	14.0541	0.234234	0.178571	0.00297619	1.40541	0.0234234	1.22683	0.00746669
257	maize (2000)	urea	360	surface	none	74.5	230.2	285.5	7.9	26.7	1.4	1.78571	0.0297619	26.2667	0.437778	0.178571	0.00297619	2.62667	0.0437778	2.4481	0.0138757
258	maize (2008)	none	0	none	none	115.2	706.5	360.2	6.6	16.2	0.9	0.134831	0.00224719	0.337079	0.00561798	0.0134831	0.000224719	0.0337079	0.000561798	0.0202247	0.000191341
258	maize (2008)	none	0	none	none	115.2	706.5	360.2	6.6	16.2	0.9	0.134831	0.00224719	0.288462	0.00480769	0.0134831	0.000224719	0.0288462	0.000480769	0.015363	0.000167821
258	maize (2008)	urea	225	subsurface	none	115.2	706.5	360.2	6.6	16.2	0.9	0.134831	0.00224719	1.76	0.0293333	0.0134831	0.000224719	0.176	0.00293333	0.162517	0.000930319
258	maize (2008)	urea	135	subsurface	none	115.2	706.5	360.2	6.6	16.2	0.9	0.134831	0.00224719	0.458015	0.00763359	0.0134831	0.000224719	0.0458015	0.000763359	0.0323184	0.000251638
258	maize (2008)	urea	180	subsurface	none	115.2	706.5	360.2	6.6	16.2	0.9	0.134831	0.00224719	0.696203	0.0116034	0.0134831	0.000224719	0.0696203	0.00116034	0.0561371	0.000373749
258	maize (2008)	urea	270	subsurface	none	115.2	706.5	360.2	6.6	16.2	0.9	0.134831	0.00224719	1.52174	0.0253623	0.0134831	0.000224719	0.152174	0.00253623	0.138691	0.000805169
259	maize (2011)	none	0	none	none	115.2	706.5	320.2	6.4	18.1	1.1	2.41379	0.0402299	2.41379	0.0402299	0.241379	0.00402299	0.241379	0.00402299	0	0.00179914
259	maize (2011)	none	0	none	none	115.2	706.5	320.2	6.4	18.1	1.1	2.41379	0.0402299	2.5	0.0416667	0.241379	0.00402299	0.25	0.00416667	0.00862069	0.00183154
259	maize (2011)	urea	135	surface	none	115.2	706.5	320.2	6.4	18.1	1.1	2.41379	0.0402299	2.41379	0.0402299	0.241379	0.00402299	0.241379	0.00402299	0	0.00179914
259	maize (2011)	urea	180	surface	none	115.2	706.5	320.2	6.4	18.1	1.1	2.41379	0.0402299	4.8913	0.0815217	0.241379	0.00402299	0.48913	0.00815217	0.247751	0.00287476
259	maize (2011)	urea	225	surface	none	115.2	706.5	320.2	6.4	18.1	1.1	2.41379	0.0402299	10.1235	0.168724	0.241379	0.00402299	1.01235	0.0168724	0.770966	0.0054851
259	maize (2011)	urea	270	surface	none	115.2	706.5	320.2	6.4	18.1	1.1	2.41379	0.0402299	11.6279	0.193798	0.241379	0.00402299	1.16279	0.0193798	0.921411	0.0062591
260	maize (2001)	none	0	none	none	75.6	254	185.5	8	21.4	1.17	8.87097	0.147849	3.89381	0.0648968	0.887097	0.0147849	0.389381	0.00648968	0.497716	0.00510598
260	maize (2001)	urea	62	surface	none	75.6	382	185.5	8	21.4	1.17	8.87097	0.147849	9.17197	0.152866	0.887097	0.0147849	0.917197	0.0152866	0.0301007	0.00672514
260	maize (2001)	urea	300	surface	none	75.6	300	185.5	8	21.4	1.17	8.87097	0.147849	42.7136	0.711893	0.887097	0.0147849	4.27136	0.0711893	3.38426	0.0229924
260	maize (2003)	none	0	none	none	75.6	254	185.5	8	21.4	1.17	8.87097	0.147849	5.71429	0.0952381	0.887097	0.0147849	0.571429	0.00952381	0.315668	0.00556145
260	maize (2003)	urea	50	surface	none	75.6	382	185.5	8	21.4	1.17	8.87097	0.147849	5.73171	0.0955285	0.887097	0.0147849	0.573171	0.00955285	0.313926	0.00556643
260	maize (2003)	urea	300	surface	none	75.6	300	185.5	8	21.4	1.17	8.87097	0.147849	57.7632	0.962719	0.887097	0.0147849	5.77632	0.0962719	4.88922	0.0308008
261	maize (2000)	none	0	none	none	100.2	310.2	211	8.5	12.5	0.9	0.44843	0.00747384	0.44843	0.00747384	0.044843	0.000747384	0.044843	0.000747384	0	0.00033424
261	maize (2000)	urea	157	surface	none	100.2	310.2	211	8.5	12.5	0.9	0.44843	0.00747384	0.705882	0.0117647	0.044843	0.000747384	0.0705882	0.00117647	0.0257452	0.000440757
261	maize (2000)	urea	157	surface	none	100.2	310.2	211	8.5	12.5	0.9	0.44843	0.00747384	2	0.0333333	0.044843	0.000747384	0.2	0.00333333	0.155157	0.00108026
261	maize (2000)	urea	157	subsurface	none	100.2	310.2	211	8.5	12.5	0.9	0.44843	0.00747384	1.52941	0.0254902	0.044843	0.000747384	0.152941	0.00254902	0.108098	0.000840005
261	maize (2000)	urea	172	surface	none	100.2	310.2	211	8.5	12.5	0.9	0.44843	0.00747384	3.61446	0.060241	0.044843	0.000747384	0.361446	0.0060241	0.316603	0.00191959
261	maize (2000)	urea	172	surface	none	100.2	310.2	211	8.5	12.5	0.9	0.44843	0.00747384	8.19277	0.136546	0.044843	0.000747384	0.819277	0.0136546	0.774434	0.00432443
261	maize (2000)	urea	172	subsurface	none	100.2	310.2	211	8.5	12.5	0.9	0.44843	0.00747384	10.1205	0.168675	0.044843	0.000747384	1.01205	0.0168675	0.967205	0.0053392
262	maize	urea	130	subsurface	none	99.4	668	190.2	8.3	8.8	0.6	0.267913	0.00446521	2.03762	0.0122066	0.0267913	0.000446521	0.203762	0.00122066	0.17697	0.000411021
262	maize	urea	130	subsurface	none	99.4	647	190.2	8.3	8.8	0.6	0.267913	0.00446521	3.27097	0.0266667	0.0267913	0.000446521	0.327097	0.00266667	0.300305	0.000855014
262	maize	urea	130	subsurface	none	99.4	668	190.2	8.3	8.8	0.6	0.267913	0.00446521	2.66742	0.026225	0.0267913	0.000446521	0.266742	0.0026225	0.23995	0.000841242
262	maize	urea	130	subsurface	none	99.4	619	190.2	8.3	8.8	0.6	0.830116	0.0138353	30.888	0.116576	0.0830116	0.00138353	3.0888	0.0116576	3.00579	0.00371231
263	maize	none	0	none	none	70.6	376.8	250	8.1	21.4	8.1	6.32239	0.105373	1.34912	0.0224854	0.632239	0.0105373	0.134912	0.00224854	0.497327	0.00340721
263	maize	urea	189	surface	none	70.6	376.8	250	8.1	21.4	8.1	6.32239	0.105373	3.66906	0.0611511	0.632239	0.0105373	0.366906	0.00611511	0.265333	0.00385266
263	maize	urea	189	surface	none	70.6	376.8	250	8.1	21.4	8.1	6.32239	0.105373	3.08824	0.0514706	0.632239	0.0105373	0.308824	0.00514706	0.323416	0.00370847
263	maize	urea	189	subsurface	none	70.6	376.8	250	8.1	21.4	8.1	6.32239	0.105373	1.68	0.028	0.632239	0.0105373	0.168	0.0028	0.464239	0.00344783
264	maize	none	0	none	none	75.5	495.6	160.2	8.8	8.8	0.6	1	0.0166667	1	0.0166667	0.1	0.00166667	0.1	0.00166667	0	0.000745356
264	maize	urea	150	surface	none	75.5	495.6	160.2	8.8	8.8	0.6	1	0.0166667	12.9412	0.215686	0.1	0.00166667	1.29412	0.0215686	1.19412	0.00684093
264	maize	urea	150	surface	none	75.5	495.6	160.2	8.8	8.8	0.6	1	0.0166667	4.33962	0.072327	0.1	0.00166667	0.433962	0.0072327	0.333962	0.00234712
264	maize	urea	150	subsurface	none	75.5	495.6	160.2	8.8	8.8	0.6	1	0.0166667	3.33333	0.0555556	0.1	0.00166667	0.333333	0.00555556	0.233333	0.00183418

## Sheet: Rice AEP
																				AEP
						Driving factors						yield scaled emission (kg N /Mg grains)				Eutrophication potential (PO4-eq./Mg grains				Effect size
Id	Crop type	Fertilizer type	N rate	Application depth	Amendments	T	P	clay (g/kg)	pH	SOM (g/kg)	N (g/kg)	CK	SD	Treat	SD	CK	SD	Treat	SD	mean	SD
108	ealry rice	none	0	none	none	106.1	660.5	333	6	41.3	1.62	0.648729	0.0108121	0.516749	0.00861248	0.0648729	0.00108121	0.0516749	0.000861248	0.013198	0.000437124
108	ealry rice	urea	180	subsurface	none	106.1	660.5	333	6	41.3	1.62	0.648729	0.0108121	1.67411	0.0279018	0.0648729	0.00108121	0.167411	0.00279018	0.102538	0.000946264
108	ealry rice	urea	150	subsurface	none	106.1	660.5	333	6	41.3	1.62	0.648729	0.0108121	0.896922	0.0149487	0.0648729	0.00108121	0.0896922	0.00149487	0.0248193	0.000583409
108	ealry rice	urea	150	subsurface	none	106.1	660.5	333	6	41.3	1.62	0.648729	0.0108121	0.955144	0.0159191	0.0648729	0.00108121	0.0955144	0.00159191	0.0306416	0.000608539
108	late rice	none	0	none	none	103.2	660.5	333	6	41.3	1.62	0.862611	0.0143768	1.17928	0.0196547	0.0862611	0.00143768	0.117928	0.00196547	0.0316674	0.000770066
108	late rice	urea	210	subsurface	none	103.2	660.5	333	6	41.3	1.62	0.862611	0.0143768	2.78301	0.0463836	0.0862611	0.00143768	0.278301	0.00463836	0.19204	0.00153562
108	late rice	urea	180	subsurface	none	103.2	660.5	333	6	41.3	1.62	0.862611	0.0143768	2.01392	0.0335653	0.0862611	0.00143768	0.201392	0.00335653	0.115131	0.0011547
108	late rice	urea	180	subsurface	none	103.2	660.5	333	6	41.3	1.62	0.862611	0.0143768	1.76597	0.0294329	0.0862611	0.00143768	0.176597	0.00294329	0.0903364	0.00103585
242	rice	none	0	none	none	104.5	638	321.5	7.36	35	1.09	1.38366	0.023061	1.38366	0.017908	0.138366	0.0023061	0.138366	0.0017908	0	0.000923313
242	rice	urea	225	surface	surface	104.5	638	321.5	7.36	35	1.09	1.38366	0.023061	0.92093	0.0406154	0.138366	0.0023061	0.092093	0.00406154	0.0462729	0.00147696
242	rice	urea	300	surface	surface	104.5	638	321.5	7.36	35	1.09	1.38366	0.023061	0.988834	0.059037	0.138366	0.0023061	0.0988834	0.0059037	0.0394825	0.00200429
243	rice	none	0	none	none	104.5	638	284	6.05	27.8	1.81	0.247031	0.00411718	0.247031	0.00411718	0.0247031	0.000411718	0.0247031	0.000411718	0	0.000184126
243	rice	urea	100	subsurface	surface	104.5	638	284	6.05	27.8	1.81	0.247031	0.00411718	0.230357	0.00383929	0.0247031	0.000411718	0.0230357	0.000383929	0.00166737	0.000178021
243	rice	urea	300	subsurface	surface	104.5	638	284	6.05	27.8	1.81	0.247031	0.00411718	0.287692	0.00479487	0.0247031	0.000411718	0.0287692	0.000479487	0.00406614	0.000199855
244	rice	none	0	none	none	104.5	638	284	6.05	27.4	0.0172	0.161472	0.0026912	0.161472	0.0026912	0.0161472	0.00026912	0.0161472	0.00026912	0	0.000120354
244	rice	OCF	150	surface	none	104.5	638	284	6.05	27.4	0.0172	0.161472	0.0026912	0.231836	0.00386393	0.0161472	0.00026912	0.0231836	0.000386393	0.00703639	0.000148904
244	rice	OCF	250	surface	none	104.5	638	284	6.05	27.4	0.0172	0.161472	0.0026912	0.294492	0.0049082	0.0161472	0.00026912	0.0294492	0.00049082	0.013302	0.000177011
244	rice	OCF	350	surface	none	104.5	638	284	6.05	27.4	0.0172	0.161472	0.0026912	0.51794	0.00863233	0.0161472	0.00026912	0.051794	0.000863233	0.0356468	0.000285936
245	rice	none	0	none	none	104.5	638	270	5.6	35.65	1.81	0.504767	0.00841279	0.504767	0.00841279	0.0504767	0.000841279	0.0504767	0.000841279	0	0.000376231
245	rice	urea	153	subsurface	none	104.5	638	270	5.6	35.65	1.81	0.504767	0.00841279	0.466439	0.00777399	0.0504767	0.000841279	0.0466439	0.000777399	0.00383281	0.000362229
245	rice	urea	210	subsurface	none	104.5	638	270	5.6	35.65	1.81	0.504767	0.00841279	0.503694	0.0083949	0.0504767	0.000841279	0.0503694	0.00083949	0.00010735	0.000375832
245	rice	urea	270	subsurface	none	104.5	638	270	5.6	35.65	1.81	0.504767	0.00841279	0.731281	0.012188	0.0504767	0.000841279	0.0731281	0.0012188	0.0226514	0.000468319
245	rice	OA	210	surface	none	104.5	638	270	5.6	35.65	1.81	0.504767	0.00841279	0.678004	0.0113001	0.0504767	0.000841279	0.0678004	0.00113001	0.0173237	0.000445496
245	rice	IU	180	surface	none	104.5	638	270	5.6	35.65	1.81	0.504767	0.00841279	0.628225	0.0104704	0.0504767	0.000841279	0.0628225	0.00104704	0.0123458	0.000424741
249	rice(2013)	none	0	basal	none	91.5	465.3	230.6	7.28	28.5	1.61	0.587963	0.00979938	0.699074	0.0116512	0.0587963	0.000979938	0.0699074	0.00116512	0.0111111	0.000481434
249	rice(2013)	none	0	basal	none	91.5	465.3	230.6	7.28	28.5	1.61	0.587963	0.00979938	0.549784	0.00916306	0.0587963	0.000979938	0.0549784	0.000916306	0.00381794	0.000424252
249	rice(2013)	urea	160	subsurface	none	91.5	465.3	230.6	7.28	28.5	1.61	0.587963	0.00979938	1.15122	0.019187	0.0587963	0.000979938	0.115122	0.0019187	0.0563257	0.000681299
249	rice(2013)	urea	160	subsurface	none	91.5	465.3	230.6	7.28	28.5	1.61	0.587963	0.00979938	0.914826	0.0152471	0.0587963	0.000979938	0.0914826	0.00152471	0.0326864	0.000573151
251	rice	none	0	none	none	101.6	702.2	280.2	7.35	35	2.09	1.14598	0.0190996	1.14598	0.0190996	0.114598	0.00190996	0.114598	0.00190996	0	0.000854161
251	rice	urea	300	surface	none	101.6	702.2	280.2	7.35	35	2.09	1.14598	0.0190996	1.0067	0.0167783	0.114598	0.00190996	0.10067	0.00167783	0.0139278	0.000803933
251	rice	urea	225	surface	none	101.6	702.2	280.2	7.35	35	2.09	1.14598	0.0190996	1.32634	0.0221056	0.114598	0.00190996	0.132634	0.00221056	0.0180359	0.000923825
251	rice	OA	341	surface	none	101.6	702.2	280.2	7.35	35	2.09	1.14598	0.0190996	1.03869	0.0173115	0.114598	0.00190996	0.103869	0.00173115	0.0107287	0.000815159
251	rice	OA	266	surface	none	101.6	702.2	280.2	7.35	35	2.09	1.20995	0.0201659	0.994375	0.0165729	0.120995	0.00201659	0.0994375	0.00165729	0.0215576	0.000825423
253	rice	none	0	none	none	103.6	645.5	320.3	6.22	14.5	1.17	0.118932	0.0019822	0.118932	0.0019822	0.0118932	0.00019822	0.0118932	0.00019822	0	8.86467e-05
253	rice	urea	270	surface	none	103.6	645.5	320.3	6.22	14.5	1.17	0.118932	0.0019822	0.0732026	0.00122004	0.0118932	0.00019822	0.00732026	0.000122004	0.00457294	7.36044e-05
253	rice	OA	270	surface	none	103.6	645.5	320.3	6.22	14.5	1.17	0.118932	0.0019822	0.0887199	0.00147866	0.0118932	0.00019822	0.00887199	0.000147866	0.00302121	7.8202e-05
253	rice	OCF	270	surface	none	103.6	645.5	320.3	6.22	14.5	1.17	0.118932	0.0019822	0.0813333	0.00135556	0.0118932	0.00019822	0.00813333	0.000135556	0.00375987	7.59385e-05
254	rice (2012)	none	0	none	none	101.6	702.2	300.2	7.36	35.65	2.09	0.156897	0.00261494	0.156897	0.00261494	0.0156897	0.000261494	0.0156897	0.000261494	0	0.000116944
254	rice (2012)	urea	300	subsurface	none	101.6	702.2	300.2	7.36	35.65	2.09	0.156897	0.00261494	0.47133	0.0078555	0.0156897	0.000261494	0.047133	0.00078555	0.0314434	0.000261814
254	rice (2012)	urea	225	subsurface	none	101.6	702.2	300.2	7.36	35.65	2.09	0.156897	0.00261494	0.146624	0.00244374	0.0156897	0.000261494	0.0146624	0.000244374	0.00102721	0.00011318
254	rice (2012)	OA	300	subsurface	none	101.6	702.2	300.2	7.36	35.65	2.09	0.156897	0.00261494	0.209707	0.00349512	0.0156897	0.000261494	0.0209707	0.000349512	0.00528104	0.000138035
254	rice (2013)	none	0	none	none	101.6	702.2	300.2	7.36	35.65	2.09	0.156897	0.00261494	0.453767	0.00756279	0.0156897	0.000261494	0.0453767	0.000756279	0.0296871	0.000253049
254	rice (2013)	urea	300	subsurface	none	101.6	702.2	300.2	7.36	35.65	2.09	0.156897	0.00261494	0.637441	0.010624	0.0156897	0.000261494	0.0637441	0.0010624	0.0480544	0.000345988
254	rice (2013)	urea	225	subsurface	none	101.6	702.2	300.2	7.36	35.65	2.09	0.156897	0.00261494	0.382956	0.0063826	0.0156897	0.000261494	0.0382956	0.00063826	0.0226059	0.000218118
254	rice (2013)	OA	300	subsurface	none	101.6	702.2	300.2	7.36	35.65	2.09	0.156897	0.00261494	0.348294	0.00580491	0.0156897	0.000261494	0.0348294	0.000580491	0.0191398	0.000201333
255	rice	urea	403	subsurface	none	101.6	702.2	295.5	6.8	31.9	1.03	0.0430108	0.000716846	0.210894	0.0035149	0.00430108	7.16846e-05	0.0210894	0.00035149	0.0167883	0.000113439
255	rice	urea	162	surface	none	101.6	702.2	295.5	6.8	31.9	1.03	0.0430108	0.000716846	0.161151	0.00268585	0.00430108	7.16846e-05	0.0161151	0.000268585	0.011814	8.79071e-05
255	rice	IU	180	subsurface	none	101.6	702.2	295.5	6.8	31.9	1.03	0.0430108	0.000716846	0.14936	0.00248933	0.00430108	7.16846e-05	0.014936	0.000248933	0.0106349	8.19184e-05
255	rice	urea	403	subsurface	none	101.6	702.2	295.5	6.8	31.9	1.03	0.0430108	0.000716846	0.133621	0.00222701	0.00430108	7.16846e-05	0.0133621	0.000222701	0.00906099	7.39827e-05
255	rice	urea	162	surface	none	101.6	702.2	295.5	6.8	31.9	1.03	0.0430108	0.000716846	0.104545	0.00174242	0.00430108	7.16846e-05	0.0104545	0.000174242	0.00615347	5.9581e-05
255	rice	IU	180	surface	none	101.6	702.2	295.5	6.8	31.9	1.03	0.0430108	0.000716846	0.0682493	0.00113749	0.00430108	7.16846e-05	0.00682493	0.000113749	0.00252385	4.25177e-05
256	rice (2009)	none	0	none	none	104.6	720.6	302.2	6.99	32	1.88	0.330532	0.00550887	0.330532	0.00550887	0.0330532	0.000550887	0.0330532	0.000550887	0	0.000246364
256	rice (2009)	urea	153	subsurface	none	104.6	720.6	302.2	6.99	32	1.88	0.330532	0.00550887	0.37514	0.00625233	0.0330532	0.000550887	0.037514	0.000625233	0.00446078	0.000263513
256	rice (2009)	urea	210	subsurface	none	104.6	720.6	302.2	6.99	32	1.88	0.330532	0.00550887	0.296928	0.00494881	0.0330532	0.000550887	0.0296928	0.000494881	0.00336039	0.000234176
256	rice (2009)	IU	210	subsurface	none	104.6	720.6	302.2	6.99	32	1.88	0.330532	0.00550887	0.344557	0.00574261	0.0330532	0.000550887	0.0344557	0.000574261	0.00140245	0.000251645
256	rice (2009)	UOA	210	subsurface	none	104.6	720.6	302.2	6.99	32	1.88	0.330532	0.00550887	0.36	0.006	0.0330532	0.000550887	0.036	0.0006	0.00294678	0.00025758
256	rice (2009)	urea	270	subsurface	none	104.6	720.6	302.2	6.99	32	1.88	0.330532	0.00550887	0.412804	0.00688006	0.0330532	0.000550887	0.0412804	0.000688006	0.00822713	0.000278716
256	rice (2010)	none	0	none	none	104.6	720.6	302.2	6.99	32	1.88	0.230496	0.00384161	0.230496	0.00384161	0.0230496	0.000384161	0.0230496	0.000384161	0	0.000171802
256	rice (2010)	urea	153	subsurface	none	104.6	720.6	302.2	6.99	32	1.88	0.230496	0.00384161	0.294045	0.00490074	0.0230496	0.000384161	0.0294045	0.000490074	0.00635482	0.000196914
256	rice (2010)	urea	210	subsurface	none	104.6	720.6	302.2	6.99	32	1.88	0.230496	0.00384161	0.24453	0.0040755	0.0230496	0.000384161	0.024453	0.00040755	0.00140338	0.000177109
256	rice (2010)	IU	210	subsurface	none	104.6	720.6	302.2	6.99	32	1.88	0.230496	0.00384161	0.333333	0.00555556	0.0230496	0.000384161	0.0333333	0.000555556	0.0102837	0.000213594
256	rice (2010)	UOA	210	subsurface	none	104.6	720.6	302.2	6.99	32	1.88	0.230496	0.00384161	0.224221	0.00373701	0.0230496	0.000384161	0.0224221	0.000373701	0.000627583	0.000169479
256	rice (2010)	urea	270	subsurface	none	104.6	720.6	302.2	6.99	32	1.88	0.230496	0.00384161	0.507898	0.00846497	0.0230496	0.000384161	0.0507898	0.000846497	0.0277401	0.000293962

## Sheet: Wheat GWP
																				GWP
						Driving factors						yield scaled emission (kg N /Mg grains)				GWP (CO2-eq./Mg grains)				Effect size
Id	Crop type	Fertilizer type	N rate	Applicationdepth	Amendments	T	P	clay (g/kg)	pH	SOM (g/kg)	N (g/kg)	CK	SD	Treat	SD	CK	SD	Treat	SD	mean	SD
280	wheat	none	0	none	none	114.2	650.6	210	5.7	7.55	1.07	0.833333	0.00446429	0.553633	0.0606061	248.333	1.33036	164.983	18.0606	83.3506	5.72674
280	wheat	OA	300	surface	none	114.2	650.6	210	5.7	7.55	1.07	0.833333	0.00446429	0.529801	0.0594901	248.333	1.33036	157.881	17.728	90.4525	5.62186
280	wheat	urea	300	surface	none	114.2	650.6	210	5.7	7.55	1.07	0.833333	0.00446429	0.837696	0.0430108	248.333	1.33036	249.634	12.8172	1.30017	4.07493
280	wheat	urea	300	subsurface	none	114.2	650.6	210	5.7	7.55	1.07	0.833333	0.00446429	1.15523	0.0109589	248.333	1.33036	344.26	3.26575	95.9266	1.11512
280	wheat	urea	300	subsurface	none	114.2	650.6	210	5.7	7.55	1.07	0.833333	0.00446429	0.566667	0.031746	248.333	1.33036	168.867	9.46032	79.4667	3.02105
282	wheat	none	0	none	none	70.6	223.6	318	8.7	12.66	1.12	0.0761905	0.00436508	0.0761905	0.011	22.7048	1.30079	22.7048	3.278	0	1.11523
282	wheat	urea	135	surface	none	70.6	223.6	318	8.7	12.66	1.12	0.0761905	0.00436508	0.0727273	0.00233333	22.7048	1.30079	21.6727	0.695333	1.03203	0.466428
282	wheat	urea	270	surface	none	70.6	223.6	318	8.7	12.66	1.12	0.0761905	0.00436508	0.0842857	0.00366667	22.7048	1.30079	25.1171	1.09267	2.41238	0.537214
282	wheat	urea	430	surface	none	70.6	223.6	318	8.7	12.66	1.12	0.0761905	0.00436508	0.108219	0.0025	22.7048	1.30079	32.2493	0.745	9.54455	0.474035
282	wheat	urea	650	surface	none	70.6	223.6	318	8.7	12.66	1.12	0.0761905	0.00436508	0.110976	0.0078125	22.7048	1.30079	33.0707	2.32812	10.366	0.84334
282	wheat	urea	850	surface	none	70.6	223.6	318	8.7	12.66	1.12	0.0761905	0.00436508	0.144	0.00354839	22.7048	1.30079	42.912	1.05742	20.2072	0.530113
284	wheat	OCF	300	surface	inhibitor	76.3	390.5	540	6.8	19.2	1.5	0.292063	0.0134921	0.596708	0.000454545	87.0349	4.02063	177.819	0.135455	90.784	1.27216
284	wheat	OCF	300	surface	inhibitor	76.3	390.5	540	6.8	19.2	1.5	0.292063	0.0134921	0.97166	0.025	87.0349	4.02063	289.555	7.45	202.52	2.67709
284	wheat	OCF	300	subsurface	inhibitor	76.3	390.5	540	6.8	19.2	1.5	0.292063	0.0134921	1.0835	0.01	87.0349	4.02063	322.883	2.98	235.848	1.58259
285	wheat	none	0	none	none	75.5	546	140	5.7	15.6	1.32	0.0258065	0.00241935	0.0580645	0.00564516	7.69032	0.720968	17.3032	1.68226	9.6129	0.578773
285	wheat	urea	250	surface	none	75.5	546	140	5.7	15.6	1.32	0.0258065	0.00241935	0.656379	0.0324074	7.69032	0.720968	195.601	9.65741	187.911	3.06244
285	wheat	urea	250	subsurface	mulch	75.5	546	140	5.7	15.6	1.32	0.0258065	0.00241935	0.547059	0.0431373	7.69032	0.720968	163.024	12.8549	155.333	4.07147
286	wheat (2006-2007)	none	0	none	none	75.5	546	140	6.9	13.12	1.3	0.103226	0.00241935	0.0883978	0.005	30.7613	0.720968	26.3425	1.49	4.41875	0.52344
286	wheat (2006-2007)	urea	180	surface	none	75.5	546	140	6.9	13.12	1.3	0.103226	0.00241935	0.457792	0.0433333	30.7613	0.720968	136.422	12.9133	105.661	4.08991
286	wheat (2006-2007)	urea	180	surface	mulch	75.5	546	140	6.9	13.12	1.3	0.103226	0.00241935	0.392661	0.0703125	30.7613	0.720968	117.013	20.9531	86.2516	6.62988
286	wheat (2006-2007)	urea	180	surface	mulch	75.5	546	140	6.9	13.12	1.3	0.103226	0.00241935	0.323162	0.0371795	30.7613	0.720968	96.3024	11.0795	65.5411	3.51105
286	wheat (2006-2007)	urea	180	subsurface	mulch	75.5	546	140	6.9	13.12	1.3	0.103226	0.00241935	0.501543	0.0522388	30.7613	0.720968	149.46	15.5672	118.699	4.92805
286	wheat (2007-2008)	urea	180	surface	none	75.5	546	140	6.9	13.12	1.3	0.103226	0.00241935	0.447791	0.0435294	30.7613	0.720968	133.442	12.9718	102.68	4.10836
286	wheat (2007-2008)	urea	180	surface	mulch	75.5	546	140	6.9	13.12	1.3	0.103226	0.00241935	0.313492	0.0341772	30.7613	0.720968	93.4206	10.1848	62.6593	3.22878
286	wheat (2007-2008)	urea	180	surface	mulch	75.5	546	140	6.9	13.12	1.3	0.103226	0.00241935	0.424361	0.2	30.7613	0.720968	126.46	59.6	95.6984	18.8486
286	wheat (2007-2008)	urea	180	subsurface	mulch	75.5	546	140	6.9	13.12	1.3	0.103226	0.00241935	0.609037	0.097561	30.7613	0.720968	181.493	29.0732	150.732	9.19657
287	wheat (2006-2007)	none	0	none	none	73.5	247	510	6.7	15.3	1.1	0.0725806	0.00201613	0.0280374	0.005	21.629	0.600806	8.35514	1.49	13.2739	0.508042
287	wheat (2006-2007)	urea	250	surface	none	73.5	247	510	6.7	15.3	1.1	0.0725806	0.00201613	0.066474	0.005	21.629	0.600806	19.8092	1.49	1.81978	0.508042
287	wheat (2006-2007)	IU	250	surface	none	73.5	247	510	6.7	15.3	1.1	0.0725806	0.00201613	0.128	0.00615385	21.629	0.600806	38.144	1.83385	16.515	0.610243
287	wheat (2006-2007)	IU	250	surface	none	73.5	247	510	6.7	15.3	1.1	0.0725806	0.00201613	0.101504	0.005625	21.629	0.600806	30.2481	1.67625	8.61909	0.563097
287	wheat (2006-2007)	IU	250	subsurface	none	73.5	247	510	6.7	15.3	1.1	0.0725806	0.00201613	0.119284	0.00827068	21.629	0.600806	35.5467	2.46466	13.9177	0.802217
287	wheat (2006-2007)	IU	250	subsurface	none	73.5	247	510	6.7	15.3	1.1	0.0725806	0.00201613	0.0572391	0.00125	21.629	0.600806	17.0572	0.3725	4.57179	0.223545
287	wheat (2006-2007)	Urea	250	subsurface	inhibitor	73.5	247	510	6.7	15.3	1.1	0.0725806	0.00201613	0.0381818	0.00166667	21.629	0.600806	11.3782	0.496667	10.2509	0.246505
287	wheat (2006-2007)	none	0	none	none	73.5	247	510	6.7	15.3	1.1	0.0725806	0.00201613	0.0806452	0.00222222	21.629	0.600806	24.0323	0.662222	2.40323	0.282755
289	wheat (2005-2006)	none	0	none	none	105.6	360.5	134	8.4	11.12	1.2	0.391304	0.00543478	1.6087	0.01	116.609	1.61957	479.391	2.98	362.783	1.07254
289	wheat (2005-2006)	urea	150	surface	none	105.6	360.5	134	8.4	11.12	1.2	0.391304	0.00543478	0.701754	0.0155	116.609	1.61957	209.123	4.619	92.5141	1.54784
289	wheat (2005-2006)	urea	250	surface	none	105.6	360.5	134	8.4	11.12	1.2	0.391304	0.00543478	0.690909	0.015	116.609	1.61957	205.891	4.47	89.2822	1.50346
289	wheat (2006-2007)	none	0	none	none	105.6	360.5	134	8.4	11.12	1.2	0.391304	0.00543478	0.847826	0.005	116.609	1.61957	252.652	1.49	136.043	0.695923
289	wheat (2006-2007)	urea	150	surface	none	105.6	360.5	134	8.4	11.12	1.2	0.391304	0.00543478	1.03939	0.0138095	116.609	1.61957	309.739	4.11524	193.131	1.39851
289	wheat (2006-2007)	urea	250	surface	none	105.6	360.5	134	8.4	11.12	1.2	0.391304	0.00543478	2.28954	0.065	116.609	1.61957	682.284	19.37	565.675	6.14671
289	wheat (2007-2008)	none	0	none	none	105.6	360.5	134	8.4	11.12	1.2	0.23913	0.0163043	0.229167	0.0075	71.2609	4.8587	68.2917	2.235	2.9692	1.69122
289	wheat (2007-2008)	urea	150	surface	none	105.6	360.5	134	8.4	11.12	1.2	0.23913	0.0163043	0.681356	0.0122222	71.2609	4.8587	203.044	3.64222	131.783	1.92023
289	wheat (2007-2008)	urea	250	surface	none	105.6	360.5	134	8.4	11.12	1.2	0.23913	0.0163043	1.10345	0.029375	71.2609	4.8587	328.828	8.75375	257.567	3.16599
290	wheat	none	0	none	none	62.5	240	110	8.7	8.01	0.57	0.0629921	0.00590551	0.0629921	0.00590551	18.7717	1.75984	18.7717	1.75984	0	0.787026
290	wheat	urea	150	surface	none	62.5	240	110	8.7	8.01	0.57	0.0629921	0.00590551	0.0921986	0.00472813	18.7717	1.75984	27.4752	1.40898	8.70352	0.712901
290	wheat	urea	250	surface	none	62.5	240	110	8.7	8.01	0.57	0.0629921	0.00590551	0.126316	0.00421053	18.7717	1.75984	37.6421	1.25474	18.8705	0.683477
291	wheat	urea	300	surface	none	61.5	312	320	7.95	12.92	1.19	0.0545313	0.00129836	0.0761155	0.010101	16.2503	0.386912	22.6824	3.0101	6.43209	0.959709
291	wheat	urea	300	surface	biochar	61.5	312	320	7.95	12.92	1.19	0.0545313	0.00129836	0.0510067	0.0166667	16.2503	0.386912	15.2	4.96667	1.05032	1.57536
291	wheat	urea	300	subsurface	biochar	61.5	312	320	7.95	12.92	1.19	0.0545313	0.00129836	0.0482846	0.00784314	16.2503	0.386912	14.3888	2.33725	1.86151	0.749164
292	wheat	none	0	none	none	63.5	246	110	8.6	13.88	1.5	0.0696561	0.00217675	0.0696561	0.00133333	20.7575	0.648672	20.7575	0.397333	0	0.240551
292	wheat	urea	200	surface	none	63.5	246	110	8.6	13.88	1.5	0.0696561	0.00217675	0.105331	0.109091	20.7575	0.648672	31.3887	32.5091	10.6311	10.2823
292	wheat	urea	200	surface	inhibitor	63.5	246	110	8.6	13.88	1.5	0.0696561	0.00217675	0.0658034	0.000793651	20.7575	0.648672	19.6094	0.236508	1.14809	0.218337
292	wheat	urea	200	subsurface	inhibitor	63.5	246	110	8.6	13.88	1.5	0.0696561	0.00217675	0.0591216	0.000970874	20.7575	0.648672	17.6182	0.28932	3.13927	0.224607
292	wheat	urea	200	subsurface	inhibitor	63.5	246	110	8.6	13.88	1.5	0.0696561	0.00217675	0.0549102	0.000344828	20.7575	0.648672	16.3633	0.102759	4.39426	0.207686
292	wheat	IU	200	surface	none	63.5	246	110	8.6	13.88	1.5	0.0696561	0.00217675	0.0535885	0.00211268	20.7575	0.648672	15.9694	0.629577	4.78813	0.285857
293	wheat	none	0	none	none	62.5	245	158	8.81	8.91	0.85	0.0453608	0.000515464	0.0453608	0.00117647	13.5175	0.153608	13.5175	0.350588	0	0.12104
293	wheat	none	0	surface	biochar	62.5	245	158	8.81	8.91	0.85	0.0453608	0.000515464	0.0447504	0.00210526	13.5175	0.153608	13.3356	0.627368	0.181898	0.204251
293	wheat	none	0	surface	biochar	62.5	245	158	8.81	8.91	0.85	0.0453608	0.000515464	0.0417641	0.000980392	13.5175	0.153608	12.4457	0.292157	1.07182	0.10438
293	wheat	none	0	subsurface	biochar	62.5	245	158	8.81	8.91	0.85	0.0453608	0.000515464	0.0466667	0.000892857	13.5175	0.153608	13.9067	0.266071	0.389141	0.0971543
293	wheat	urea	200	surface	none	62.5	245	158	8.81	8.91	0.85	0.0453608	0.000515464	0.0721067	0.000625	13.5175	0.153608	21.4878	0.18625	7.97028	0.0763443
293	wheat	urea	200	surface	biochar	62.5	245	158	8.81	8.91	0.85	0.0453608	0.000515464	0.0722022	0.00731707	13.5175	0.153608	21.5162	2.18049	7.99872	0.69124
293	wheat	urea	200	subsurface	biochar	62.5	245	158	8.81	8.91	0.85	0.0453608	0.000515464	0.0701299	0.00125	13.5175	0.153608	20.8987	0.3725	7.38118	0.127417
293	wheat	urea	200	subsurface	biochar	62.5	245	158	8.81	8.91	0.85	0.0453608	0.000515464	0.0778364	0.00460526	13.5175	0.153608	23.1953	1.37237	9.67772	0.436691
297	wheat	none	0	none	none	81.2	420	510	6.7	14.88	1.1	0.466216	0.000844595	0.959459	0.0103448	138.932	0.251689	285.919	3.08276	146.986	0.978098
297	wheat	urea	225	surface	mulch	81.2	420	510	6.7	14.88	1.1	0.466216	0.000844595	0.450654	0.00130435	138.932	0.251689	134.295	0.388696	4.63755	0.146435
297	wheat	urea	100	surface	none	81.2	420	510	6.7	14.88	1.1	0.466216	0.000844595	1.30894	0.0109091	138.932	0.251689	390.065	3.25091	251.133	1.0311
297	wheat	urea	200	surface	none	81.2	420	510	6.7	14.88	1.1	0.466216	0.000844595	1.30894	0.00666667	138.932	0.251689	390.065	1.98667	251.133	0.633261
297	wheat	urea	300	surface	none	81.2	420	510	6.7	14.88	1.1	0.466216	0.000844595	1.39006	0.0277419	138.932	0.251689	414.237	8.2671	275.305	2.6155
297	wheat	urea	150	surface	mulch	81.2	420	510	6.7	14.88	1.1	0.466216	0.000844595	1.25814	0.0183333	138.932	0.251689	374.926	5.46333	235.993	1.72949
297	wheat	urea	225	surface	mulch	81.2	420	510	6.7	14.88	1.1	0.466216	0.000844595	1.28906	0.00728477	138.932	0.251689	384.141	2.17086	245.208	0.691085
301	wheat	none	0	none	none	79.8	401.2	164	6.2	25.7	1.35	0.047619	0.00529101	0.047619	0.00666667	14.1905	1.57672	14.1905	1.98667	0	0.802053
301	wheat	urea	300	surface	none	79.8	401.2	164	6.2	25.7	1.35	0.047619	0.00529101	0.0515152	0.00290323	14.1905	1.57672	15.3515	0.865161	1.16104	0.568731
301	wheat	IU	210	surface	none	79.8	401.2	164	6.2	25.7	1.35	0.047619	0.00529101	0.03698	0.00151515	14.1905	1.57672	11.02	0.451515	3.17045	0.518643
301	wheat	none	0	0	none	79.8	401.2	448	8.29	24.8	1.46	0.0454545	0.00505051	0.0479798	0.00421053	13.5455	1.50505	14.298	1.25474	0.752525	0.61964
301	wheat	urea	300	subsurface	none	79.8	401.2	448	8.29	24.8	1.46	0.0454545	0.00505051	0.062701	0.00391304	13.5455	1.50505	18.6849	1.16609	5.13943	0.602074
301	wheat	IU	210	subsurface	none	79.8	401.2	448	8.29	24.8	1.46	0.0454545	0.00505051	0.0494234	0.000625	13.5455	1.50505	14.7282	0.18625	1.18272	0.479569
302	wheat	none	0	none	none	82.5	455.6	350	5.95	13.12	0.51	0.40724	0.0245098	0.40724	0.0164557	121.357	7.30392	121.357	4.9038	0	2.78199
302	wheat	urea	262.5	surface	none	82.5	455.6	350	5.95	13.12	0.51	0.40724	0.0245098	0.957786	0.00341207	121.357	7.30392	285.42	1.0168	164.063	2.33198
302	wheat	urea	225	surface	none	82.5	455.6	350	5.95	13.12	0.51	0.40724	0.0245098	0.784238	0.00896739	121.357	7.30392	233.703	2.67228	112.345	2.45944
302	wheat	urea	225	surface	biochar	82.5	455.6	350	5.95	13.12	0.51	0.40724	0.0245098	0.698644	0.00396825	121.357	7.30392	208.196	1.18254	86.8386	2.33978
302	wheat	urea	225	subsurface	biochar	82.5	455.6	350	5.95	13.12	0.51	0.40724	0.0245098	0.713883	0.0095	121.357	7.30392	212.737	2.831	91.3797	2.47713
304	wheat (2009-2010)	none	0	none	none	60.2	220	420	8.24	14.7	0.9	0.0727273	0.00378788	0.0727273	0.025	21.6727	1.12879	21.6727	7.45	0	2.38279
304	wheat (2009-2010)	urea	200	surface	none	60.2	220	420	8.24	14.7	0.9	0.0727273	0.00378788	0.148485	0.00222222	21.6727	1.12879	44.2485	0.662222	22.5758	0.413848
304	wheat (2009-2010)	urea	200	surface	mulch	60.2	220	420	8.24	14.7	0.9	0.0727273	0.00378788	0.15	0.002	21.6727	1.12879	44.7	0.596	23.0273	0.403656
304	wheat (2009-2010)	OA	200	subsurface	mulch	60.2	220	420	8.24	14.7	0.9	0.0727273	0.00378788	0.220513	0.0181818	21.6727	1.12879	65.7128	5.41818	44.0401	1.75017
304	wheat (2009-2010)	urea	200	surface	inhibitor	60.2	220	420	8.24	14.7	0.9	0.0939394	0.00227273	0.0861111	0.01	27.9939	0.677273	25.6611	2.98	2.33283	0.96639
304	wheat (2009-2010)	IU	200	surface	mulch	60.2	220	420	8.24	14.7	0.9	0.106897	0.00258621	0.162069	0.00666667	31.8552	0.77069	48.2966	1.98667	16.4414	0.673855
304	wheat (2010-2011)	none	0	none	none	60.2	220	420	8.24	14.7	0.9	0.08	0.001	0.08	0.0025	23.84	0.298	23.84	0.745	0	0.253738
304	wheat (2010-2011)	urea	200	surface	none	60.2	220	420	8.24	14.7	0.9	0.08	0.001	0.211111	0.03	23.84	0.298	62.9111	8.94	39.0711	2.82865
304	wheat (2010-2011)	urea	200	subsurface	mulch	60.2	220	420	8.24	14.7	0.9	0.08	0.001	0.246154	0.02	23.84	0.298	73.3538	5.96	49.5138	1.88707
304	wheat (2010-2011)	OA	200	surface	mulch	60.2	220	420	8.24	14.7	0.9	0.08	0.001	0.236	0.0866667	23.84	0.298	70.328	25.8267	46.488	8.16765
304	wheat (2010-2011)	urea	200	surface	inhibitor	60.2	220	420	8.24	14.7	0.9	0.08	0.001	0.106522	0.0285714	23.84	0.298	31.7435	8.51429	7.90348	2.6941
304	wheat (2010-2011)	IU	200	surface	mulch	60.2	220	420	8.24	14.7	0.9	0.08	0.001	0.134211	0.00333333	23.84	0.298	39.9947	0.993333	16.1547	0.32795

## Sheet: Maize GWP
																				GWP
						Driving factors						yield scaled emission (kg N /Mg grains)				GWP (CO2-eq./Mg grains)				Effect size
Id	Crop type	Fertilizer type	N rate	Application depth	Amendments	T	P	clay (g/kg)	pH	SOM (g/kg)	N (g/kg)	CK	SD	Treat	SD	CK	SD	Treat	SD	Mean	SD
265	maize	none	0	none	none	108.2	450.6	340	7.1	16.2	1.3	0.0355932	0.00059322	0.0355932	0.00059322	10.6068	0.17678	10.6068	0.17678	0	0.0790583
265	maize	urea	225	surface	none	108.2	450.6	340	7.1	16.2	1.3	0.0355932	0.00059322	0.117333	0.00195556	10.6068	0.17678	34.9653	0.582756	24.3586	0.192576
266	maize	urea	120	surface	none	108.5	430	199	8.4	16.9	1.8	0.0355932	0.00059322	0.0634146	0.00105691	10.6068	0.17678	18.8976	0.314959	8.29078	0.114215
266	maize	urea	330	surface	none	108.5	430	199	8.4	16.9	1.8	0.0355932	0.00059322	0.122131	0.00203552	10.6068	0.17678	36.3951	0.606585	25.7883	0.199799
267	maize	none	0	none	none	108.5	430	199	7.5	16.9	1.8	0.0238636	0.000397727	0.0238636	0.000397727	7.11136	0.118523	7.11136	0.118523	0	0.053005
267	maize	urea	180	surface	none	108.5	430	199	7.5	16.9	1.8	0.0238636	0.000397727	0.0830357	0.00138393	7.11136	0.118523	24.7446	0.412411	17.6333	0.135695
267	maize	urea	180	subsurface	none	108.5	430	199	7.5	16.9	1.8	0.0238636	0.000397727	0.117822	0.0019637	7.11136	0.118523	35.1109	0.585182	27.9995	0.188808
268	maize	none	0	none	none	118.6	562	318	8.7	11.3	1.1	0.0635184	0.00105864	0.0635184	0.00105864	18.9285	0.315475	18.9285	0.315475	0	0.141085
268	maize	urea	210	surface	mulch	118.6	562	318	8.7	11.3	1.1	0.0635184	0.00105864	0.4	0.00666667	18.9285	0.315475	119.2	1.98667	100.272	0.636111
268	maize	urea	210	subsurface	mulch	118.6	562	318	8.7	11.3	1.1	0.0635184	0.00105864	0.25	0.00416667	18.9285	0.315475	74.5	1.24167	55.5715	0.405125
269	maize	urea	200	surface	none	105.2	430.5	110	8.6	12	1.5	0.0131815	0.000219692	0.074296	0.00123827	3.9281	0.0654683	22.1402	0.369003	18.2121	0.118511
269	maize	urea	200	subsurface	ihibitor	105.2	430.5	110	8.6	12	1.5	0.0131815	0.000219692	0.0364431	0.000607386	3.9281	0.0654683	10.8601	0.181001	6.93196	0.0608666
269	maize	urea	200	surface	ihibitor	105.2	430.5	110	8.6	12	1.5	0.0131815	0.000219692	0.0325425	0.000542375	3.9281	0.0654683	9.69767	0.161628	5.76957	0.055145
269	maize	urea	200	subsurface	ihibitor	105.2	430.5	110	8.6	12	1.5	0.0131815	0.000219692	0.0276243	0.000460405	3.9281	0.0654683	8.23204	0.137201	4.30394	0.048073
270	maize	none	0	none	none	105.2	430.5	110	8.6	9.9	0.6	0.03	0.0005	0.03	0.0005	8.94	0.149	8.94	0.149	0	0.0666348
270	maize	urea	150	surface	none	105.2	430.5	110	8.6	9.9	0.6	0.03	0.0005	0.0811594	0.00135266	8.94	0.149	24.1855	0.403092	15.2455	0.135898
270	maize	OCF	150	surface	none	105.2	430.5	110	8.6	9.9	0.6	0.03	0.0005	0.128788	0.00214646	8.94	0.149	38.3788	0.639646	29.4388	0.207689
270	maize	none	0	none	none	105.2	430.5	110	8.6	9.9	0.6	0.03	0.0005	0.0766667	0.00127778	8.94	0.149	22.8467	0.380778	13.9067	0.129303
270	maize	urea	150	subsurface	sub	105.2	430.5	110	8.6	9.9	0.6	0.03	0.0005	0.0971014	0.00161836	8.94	0.149	28.9362	0.482271	19.9962	0.15962
270	maize	urea	150	surface	sur	105.2	430.5	110	8.6	9.9	0.6	0.03	0.0005	0.35	0.00583333	8.94	0.149	104.3	1.73833	95.36	0.551725
271	maize	urea	80	surface	sur	73.5	260.8	201	8	21.4	1.2	0.00892857	0.00014881	0.110714	0.00184524	2.66071	0.0443452	32.9929	0.549881	30.3321	0.174452
271	maize	urea	300	subsurface	sub	73.5	260.8	201	8	21.4	1.2	0.00892857	0.00014881	0.116667	0.00194444	2.66071	0.0443452	34.7667	0.579444	32.106	0.183772
271	maize	urea	300	surface	sur	73.5	260.8	201	8	21.4	1.2	0.00892857	0.00014881	0.330357	0.00550595	2.66071	0.0443452	98.4464	1.64077	95.7857	0.519048
271	maize	urea	80	subsurface	sub	73.5	260.8	201	8	21.4	1.2	0.00892857	0.00014881	0.0151515	0.000252525	2.66071	0.0443452	4.51515	0.0752525	1.85444	0.0276214
272	maize (2009)	none	0	none	none	95.6	360.6	380.5	8.2	14.7	0.9	0.0982143	0.0016369	0.0604396	0.00100733	29.2679	0.487798	18.011	0.300183	11.2569	0.181123
272	maize (2009)	urea	180	surface	none	95.6	360.6	380.5	8.2	14.7	0.9	0.0982143	0.0016369	0.180851	0.00301418	29.2679	0.487798	53.8936	0.898227	24.6258	0.323227
272	maize (2009)	urea	180	subsurface	mulch	95.6	360.6	380.5	8.2	14.7	0.9	0.0982143	0.0016369	0.191304	0.00318841	29.2679	0.487798	57.0087	0.950145	27.7408	0.337746
272	maize (2010)	none	0	none	none	95.6	360.6	380.5	8.2	14.7	0.9	0.0607143	0.0010119	0.0377778	0.00062963	18.0929	0.301548	11.2578	0.18763	6.83508	0.11231
272	maize (2010)	urea	180	surface	none	95.6	360.6	380.5	8.2	14.7	0.9	0.0607143	0.0010119	0.118478	0.00197464	18.0929	0.301548	35.3065	0.588442	17.2137	0.209092
272	maize (2010)	urea	180	subsurface	mulch	95.6	360.6	380.5	8.2	14.7	0.9	0.0607143	0.0010119	0.121296	0.0020216	18.0929	0.301548	36.1463	0.602438	18.0534	0.213041
273	maize	none	0	none	none	101.2	270.5	315.5	7.8	19.3	1	0.0163265	0.000272109	0.0163265	0.000272109	4.86531	0.0810884	4.86531	0.0810884	0	0.0362639
273	maize	Urea	60	surface	none	101.2	270.5	315.5	7.8	19.3	1	0.0163265	0.000272109	0.0191919	0.000319865	4.86531	0.0810884	5.71919	0.0953199	0.853886	0.0395742
273	maize	Urea	120	surface	none	101.2	270.5	315.5	7.8	19.3	1	0.0163265	0.000272109	0.0465347	0.000775578	4.86531	0.0810884	13.8673	0.231122	9.00202	0.077455
273	maize	Urea	180	surface	none	101.2	270.5	315.5	7.8	19.3	1	0.0163265	0.000272109	0.0427184	0.000711974	4.86531	0.0810884	12.7301	0.212168	7.86479	0.0718267
273	maize	Urea	240	surface	none	101.2	270.5	315.5	7.8	19.3	1	0.0163265	0.000272109	0.0663265	0.00110544	4.86531	0.0810884	19.7653	0.329422	14.9	0.107282
274	maize	none	0	none	none	98.3	310.5	280	8	11.7	0.95	0.114667	0.00191111	0.114667	0.00191111	34.1707	0.569511	34.1707	0.569511	0	0.254693
274	maize	Urea	240	subsurface	none	98.3	310.5	280	8	11.7	0.95	0.114667	0.00191111	0.371765	0.00619608	34.1707	0.569511	110.786	1.84643	76.6152	0.611036
274	maize	Urea	168	surface	none	98.3	310.5	280	8	11.7	0.95	0.114667	0.00191111	0.310714	0.00517857	34.1707	0.569511	92.5929	1.54321	58.4222	0.520178
274	maize	Urea	168	subsurface	none	98.3	310.5	280	8	11.7	0.95	0.114667	0.00191111	0.233721	0.00389535	34.1707	0.569511	69.6488	1.16081	35.4782	0.40888
275	maize (2009)	none	0	none	none	75.5	350.8	220	7.7	12.6	0.7	0.101942	0.00169903	0.101942	0.00169903	30.3786	0.506311	30.3786	0.506311	0	0.226429
275	maize (2009)	Urea	250	surface	none	75.5	350.8	220	7.7	12.6	0.7	0.101942	0.00169903	0.238824	0.00398039	30.3786	0.506311	71.1694	1.18616	40.7908	0.407838
275	maize (2009)	Urea	185	surface	none	75.5	350.8	220	7.7	12.6	0.7	0.101942	0.00169903	0.305952	0.00509921	30.3786	0.506311	91.1738	1.51956	60.7952	0.5065
275	maize (2009)	Urea	210	surface	none	75.5	350.8	220	7.7	12.6	0.7	0.101942	0.00169903	0.181395	0.00302326	30.3786	0.506311	54.0558	0.90093	23.6772	0.326807
275	maize (2009)	Urea	250	surface	none	75.5	350.8	220	7.7	12.6	0.7	0.101942	0.00169903	0.242029	0.00403382	30.3786	0.506311	72.1246	1.20208	41.746	0.412473
275	maize (2010)	Urea	185	surface	none	75.5	350.8	220	7.7	12.6	0.7	0.101942	0.00169903	0.275342	0.00458904	30.3786	0.506311	82.0521	1.36753	51.6734	0.46114
275	maize (2010)	Urea	185	surface	none	75.5	350.8	220	7.7	12.6	0.7	0.101942	0.00169903	0.232432	0.00387387	30.3786	0.506311	69.2649	1.15441	38.8862	0.398626
275	maize (2010)	Urea	150	surface	none	75.5	350.8	220	7.7	12.6	0.7	0.101942	0.00169903	0.171212	0.00285354	30.3786	0.506311	51.0212	0.850354	20.6426	0.312962
275	maize (2010)	Urea	250	surface	none	75.5	350.8	220	7.7	12.6	0.7	0.101942	0.00169903	0.262687	0.00437811	30.3786	0.506311	78.2806	1.30468	47.902	0.442553
275	maize (2011)	Urea	185	surface	none	75.5	350.8	220	7.7	12.6	0.7	0.101942	0.00169903	0.170667	0.00284444	30.3786	0.506311	50.8587	0.847644	20.48	0.312226
275	maize (2011)	Urea	162	surface	none	75.5	350.8	220	7.7	12.6	0.7	0.101942	0.00169903	0.141758	0.00236264	30.3786	0.506311	42.244	0.704066	11.8653	0.274237
275	maize (2011)	Urea	178	surface	none	75.5	350.8	220	7.7	12.6	0.7	0.101942	0.00169903	0.103061	0.00171769	30.3786	0.506311	30.7122	0.511871	0.333604	0.227676
275	maize (2011)	Urea	150	surface	none	75.5	350.8	220	7.7	12.6	0.7	0.101942	0.00169903	0.121978	0.00203297	30.3786	0.506311	36.3495	0.605824	5.97081	0.249674
276	maize	none	0	none	none	98.6	350.5	321	8.2	14.7	0.9	0.0692641	0.0011544	0.0692641	0.0011544	20.6407	0.344012	20.6407	0.344012	0	0.153847
276	maize	Urea	185	surface	none	98.6	350.5	321	8.2	14.7	0.9	0.0692641	0.0011544	0.164706	0.0027451	20.6407	0.344012	49.0824	0.818039	28.4417	0.28063
276	maize	Urea	250	surface	none	98.6	350.5	321	8.2	14.7	0.9	0.0692641	0.0011544	0.236364	0.00393939	20.6407	0.344012	70.4364	1.17394	49.7957	0.386843
277	Maize	none	0	none	none	102.6	360.5	200	5.9	32.5	2.2	0.0655933	0.000496919	0.0655933	0.000478469	19.5468	0.148082	19.5468	0.142584	0	0.0650064
277	Maize	urea	150	surface	none	102.6	360.5	200	5.9	32.5	2.2	0.0655933	0.000496919	0.1449	0.00617284	19.5468	0.148082	43.1803	1.83951	23.6335	0.583585
277	Maize	OA	150	surface	none	102.6	360.5	200	5.9	32.5	2.2	0.0655933	0.000496919	0.284959	0.0269231	19.5468	0.148082	84.9179	8.02308	65.3711	2.53755
277	Maize	OA	150	surface	none	102.6	360.5	200	5.9	32.5	2.2	0.0655933	0.000496919	0.164732	0.00165563	19.5468	0.148082	49.0902	0.493377	29.5434	0.162896
277	Maize	OA	150	subsurface	none	102.6	360.5	200	5.9	32.5	2.2	0.0655933	0.000496919	0.190726	0.00285714	19.5468	0.148082	56.8362	0.851429	37.2894	0.273287
277	Maize	OA	150	subsurface	none	102.6	360.5	200	5.9	32.5	2.2	0.0655933	0.000496919	0.165639	0.00178926	19.5468	0.148082	49.3606	0.533201	29.8137	0.174995
278	Maize	none	0	none	none	106.5	380.6	200	6.1	31.11	2.1	0.13715	0.00447227	0.13715	0.00430622	40.8706	1.33274	40.8706	1.28325	0	0.585058
278	Maize	urea	75	surface	none	106.5	380.6	200	6.1	31.11	2.1	0.13715	0.00447227	0.220173	0.00864198	40.8706	1.33274	65.6116	2.57531	24.741	0.916973
278	Maize	OA	37.5	surface	none	106.5	380.6	200	6.1	31.11	2.1	0.13715	0.00447227	0.247216	0.0307692	40.8706	1.33274	73.6705	9.16923	32.7999	2.93003
278	Maize	OA	0	surface	none	106.5	380.6	200	6.1	31.11	2.1	0.13715	0.00447227	0.243355	0.00331126	40.8706	1.33274	72.5197	0.986755	31.6491	0.524392
278	Maize	OA	0	surface	none	106.5	380.6	200	6.1	31.11	2.1	0.13715	0.00447227	0.185116	0.00285714	40.8706	1.33274	55.1645	0.851429	14.2939	0.500112
278	Maize	OA	0	surface	none	106.5	380.6	200	6.1	31.11	2.1	0.13715	0.00447227	0.161787	0.00198807	40.8706	1.33274	48.2126	0.592445	7.34203	0.461214
280	maize	none	0	none	none	114.2	650.6	210	5.7	7.55	1.07	0.833333	0.00446429	0.833333	0.01	248.333	1.33036	248.333	2.98	0	1.032
280	maize	OA	300	surface	none	114.2	650.6	210	5.7	7.55	1.07	0.833333	0.00446429	0.31946	0.001	248.333	1.33036	95.1991	0.298	153.134	0.431121
280	maize	urea	300	surface	none	114.2	650.6	210	5.7	7.55	1.07	0.833333	0.00446429	0.388248	0.00565217	248.333	1.33036	115.698	1.68435	132.636	0.67874
280	maize	urea	300	subsurface	none	114.2	650.6	210	5.7	7.55	1.07	0.833333	0.00446429	0.446281	0.002	248.333	1.33036	132.992	0.596	115.342	0.460984
280	maize	urea	300	subsurface	none	114.2	650.6	210	5.7	7.55	1.07	0.833333	0.00446429	0.321429	0.00384615	248.333	1.33036	95.7857	1.14615	152.548	0.555294
281	maize (2011)	none	0	none	none	116.5	325	120	8.4	5.11	0.4	0.0355913	0.00229621	0.0355913	0.0472727	10.6062	0.684271	10.6062	14.0873	0	4.46004
281	maize (2011)	urea	432	surface	none	116.5	325	120	8.4	5.11	0.4	0.0355913	0.00229621	0.0894901	0.0357143	10.6062	0.684271	26.6681	10.6429	16.0619	3.37252
281	maize (2011)	urea	432	subsurface	none	116.5	325	120	8.4	5.11	0.4	0.0355913	0.00229621	0.0824008	0.0621622	10.6062	0.684271	24.5554	18.5243	13.9492	5.8619
281	maize (2011)	none	0	none	none	116.5	325	120	8.4	5.11	0.4	0.0355913	0.00229621	0.0430464	0.00689655	10.6062	0.684271	12.8278	2.05517	2.22161	0.684979
281	maize (2011)	urea	217	surface	none	116.5	325	120	8.4	5.11	0.4	0.0355913	0.00229621	0.0330813	0.00188679	10.6062	0.684271	9.85822	0.562264	0.747977	0.280066
281	maize (2011)	urea	217	subsurface	none	116.5	325	120	8.4	5.11	0.4	0.0355913	0.00229621	0.0364892	0.00408163	10.6062	0.684271	10.8738	1.21633	0.267567	0.441325
281	maize (2012)	none	0	none	none	115.2	377	120	8.4	5.11	0.4	0.0378049	0.00243902	0.317073	0.0280488	11.2659	0.726829	94.4878	8.35854	83.222	2.65318
281	maize (2012)	urea	432	surface	none	115.2	377	120	8.4	5.11	0.4	0.0378049	0.00243902	0.212014	0.0152047	11.2659	0.726829	63.1802	4.53099	51.9144	1.45114
281	maize (2012)	urea	432	subsurface	none	115.2	377	120	8.4	5.11	0.4	0.0378049	0.00243902	0.181914	0.0125	11.2659	0.726829	54.2103	3.725	42.9445	1.20016
281	maize (2012)	none	0	none	none	115.2	377	120	8.4	5.11	0.4	0.0378049	0.00243902	0.0931744	0.00571429	11.2659	0.726829	27.766	1.70286	16.5001	0.585492
281	maize (2012)	urea	217	surface	none	115.2	377	120	8.4	5.11	0.4	0.0378049	0.00243902	0.0750452	0.0174603	11.2659	0.726829	22.3635	5.20317	11.0976	1.66136
281	maize (2012)	urea	217	subsurface	none	115.2	377	120	8.4	5.11	0.4	0.0378049	0.00243902	0.0664	0.00246154	11.2659	0.726829	19.7872	0.733538	8.52135	0.326552
282	maize	none	0	none	none	106.5	335.4	318	8.7	12.66	1.12	0.0979592	0.00561224	0.206122	0.0125	29.1918	1.67245	61.4245	3.725	32.2327	1.29123
282	maize	urea	135	surface	none	106.5	335.4	318	8.7	12.66	1.12	0.0979592	0.00561224	0.272881	0.0155556	29.1918	1.67245	81.3186	4.63556	52.1268	1.55838
282	maize	urea	270	surface	none	106.5	335.4	318	8.7	12.66	1.12	0.0979592	0.00561224	0.294118	0.015	29.1918	1.67245	87.6471	4.47	58.4552	1.50924
282	maize	urea	430	surface	none	106.5	335.4	318	8.7	12.66	1.12	0.0979592	0.00561224	0.388571	0.016	29.1918	1.67245	115.794	4.768	86.6024	1.59784
282	maize	urea	650	surface	none	106.5	335.4	318	8.7	12.66	1.12	0.0979592	0.00561224	0.553947	0.0518182	29.1918	1.67245	165.076	15.4418	135.884	4.91169
282	maize	urea	850	surface	none	106.5	335.4	318	8.7	12.66	1.12	0.0979592	0.00561224	0.534524	0.0386667	29.1918	1.67245	159.288	11.5227	130.096	3.68197
287	maize (2007)	urea	300	surface	none	108.8	548	510	6.7	15.3	1.1	0.0280374	0.000778816	0.302144	0.0412698	8.35514	0.232087	90.039	12.2984	81.6838	3.88979
287	maize (2007)	IU	300	surface	none	108.8	548	510	6.7	15.3	1.1	0.0280374	0.000778816	0.734783	0.0152542	8.35514	0.232087	218.965	4.54576	210.61	1.43937
287	maize (2007)	IU	300	surface	none	108.8	548	510	6.7	15.3	1.1	0.0280374	0.000778816	1.11471	0.0651515	8.35514	0.232087	332.182	19.4152	323.827	6.14005
287	maize (2007)	IU	300	subsurface	none	108.8	548	510	6.7	15.3	1.1	0.0280374	0.000778816	0.509346	0.0338462	8.35514	0.232087	151.785	10.0862	143.43	3.19037
287	maize (2007)	IU	300	subsurface	none	108.8	548	510	6.7	15.3	1.1	0.0280374	0.000778816	0.268116	0.0193333	8.35514	0.232087	79.8986	5.76133	71.5434	1.82337
287	maize (2007)	Urea	300	subsurface	inhibitor	108.8	548	510	6.7	15.3	1.1	0.0280374	0.000778816	0.199301	0.00945946	8.35514	0.232087	59.3916	2.81892	51.0365	0.894437
287	maize (2007)	none	0	none	none	108.8	548	510	6.7	15.3	1.1	0.0280374	0.000778816	0.102804	0.00892857	8.35514	0.232087	30.6355	2.66071	22.2804	0.844587
287	maize (2008)	urea	300	surface	none	107.2	404	510	6.7	15.3	1.1	0.0130435	0.000362319	0.241888	0.00594059	3.88696	0.107971	72.0826	1.7703	68.1956	0.560857
287	maize (2008)	IU	300	surface	none	107.2	404	510	6.7	15.3	1.1	0.0130435	0.000362319	0.276273	0.00487805	3.88696	0.107971	82.3294	1.45366	78.4424	0.460953
287	maize (2008)	IU	300	surface	none	107.2	404	510	6.7	15.3	1.1	0.0130435	0.000362319	0.199847	0.0178571	3.88696	0.107971	59.5545	5.32143	55.6676	1.68313
287	maize (2008)	IU	300	subsurface	none	107.2	404	510	6.7	15.3	1.1	0.0130435	0.000362319	0.185893	0.0232258	3.88696	0.107971	55.396	6.92129	51.5091	2.18897
287	maize (2008)	IU	300	subsurface	none	107.2	404	510	6.7	15.3	1.1	0.0130435	0.000362319	0.130732	0.0119048	3.88696	0.107971	38.9582	3.54762	35.0713	1.12238
287	maize (2008)	Urea	300	subsurface	inhibitor	107.2	404	510	6.7	15.3	1.1	0.0130435	0.000362319	0.0637141	0.00458015	3.88696	0.107971	18.9868	1.36489	15.0998	0.432963
287	maize (2008)	none	0	none	none	107.2	404	510	6.7	15.3	1.1	0.0130435	0.000362319	0.0507246	0.0128205	3.88696	0.107971	15.1159	3.82051	11.229	1.20863
290	maize	none	0	none	none	99.6	370	110	8.7	8.01	0.57	0.114256	0.00389509	0.114256	0.00389509	34.0483	1.16074	34.0483	1.16074	0	0.519098
290	maize	urea	150	surface	none	99.6	370	110	8.7	8.01	0.57	0.114256	0.00389509	0.392578	0.00634766	34.0483	1.16074	116.988	1.8916	82.94	0.701817
290	maize	urea	250	surface	none	99.6	370	110	8.7	8.01	0.57	0.114256	0.00389509	0.609677	0.0112903	34.0483	1.16074	181.684	3.36452	147.636	1.12549
291	maize	none	0	none	none	101.6	468	260	8.28	12.55	1.04	0.0545313	0.00129836	0.0545313	0.02	16.2503	0.386912	16.2503	5.96	0	1.88868
291	maize	urea	300	surface	none	101.6	468	260	8.28	12.55	1.04	0.0545313	0.00129836	0.183459	0.1	16.2503	0.386912	54.6707	29.8	38.4204	9.42438
291	maize	urea	300	surface	biochar	101.6	468	260	8.28	12.55	1.04	0.0545313	0.00129836	0.138677	0.012	16.2503	0.386912	41.3257	3.576	25.0754	1.13743
291	maize	urea	300	subsurface	biochar	101.6	468	260	8.28	12.55	1.04	0.0545313	0.00129836	0.0956873	0.00714286	16.2503	0.386912	28.5148	2.12857	12.2645	0.684143
293	maize	none	0	none	none	103.5	370	158	8.81	8.91	0.85	0.0864947	0.00151745	0.0864947	0.00266667	25.7754	0.4522	25.7754	0.794667	0	0.289133
293	maize	none	0	surface	biochar	103.5	370	158	8.81	8.91	0.85	0.0864947	0.00151745	0.138583	0.00166667	25.7754	0.4522	41.2976	0.496667	15.5222	0.212406
293	maize	none	0	surface	biochar	103.5	370	158	8.81	8.91	0.85	0.0864947	0.00151745	0.145086	0.00785714	25.7754	0.4522	43.2356	2.34143	17.4602	0.754107
293	maize	none	0	subsurface	biochar	103.5	370	158	8.81	8.91	0.85	0.0864947	0.00151745	0.180328	0.006	25.7754	0.4522	53.7377	1.788	27.9623	0.583218
293	maize	urea	200	surface	none	103.5	370	158	8.81	8.91	0.85	0.0864947	0.00151745	0.296763	0.0126316	25.7754	0.4522	88.4353	3.76421	62.6598	1.19891
293	maize	urea	200	surface	biochar	103.5	370	158	8.81	8.91	0.85	0.0864947	0.00151745	0.17951	0.0114583	25.7754	0.4522	53.4941	3.41458	27.7187	1.08921
293	maize	urea	200	subsurface	biochar	103.5	370	158	8.81	8.91	0.85	0.0864947	0.00151745	0.20071	0.00652174	25.7754	0.4522	59.8117	1.94348	34.0363	0.630999
293	maize	urea	200	subsurface	biochar	103.5	370	158	8.81	8.91	0.85	0.0864947	0.00151745	0.19457	0.0145	25.7754	0.4522	57.9819	4.321	32.2065	1.37388
304	maize (2009)	none	0	none	none	96.6	335	420	8.24	14.7	0.9	0.0659341	0.00302198	0.0659341	0.01375	19.6484	0.900549	19.6484	4.0975	0	1.32667
304	maize (2009)	urea	180	surface	none	96.6	335	420	8.24	14.7	0.9	0.0659341	0.00302198	0.201064	0.0215	19.6484	0.900549	59.917	6.407	40.2687	2.04599
304	maize (2009)	urea	180	subsurface	mulch	96.6	335	420	8.24	14.7	0.9	0.0659341	0.00302198	0.222826	0.0866667	19.6484	0.900549	66.4022	25.8267	46.7538	8.17207
304	maize (2009)	OA	180	surface	mulch	96.6	335	420	8.24	14.7	0.9	0.0659341	0.00302198	0.236559	0.0883333	19.6484	0.900549	70.4946	26.3233	50.8463	8.32904
304	maize (2009)	urea	180	surface	inhibitor	96.6	335	420	8.24	14.7	0.9	0.0659341	0.00302198	0.0731183	0.01	19.6484	0.900549	21.7892	2.98	2.1409	0.984449
304	maize (2009)	IU	180	surface	mulch	96.6	335	420	8.24	14.7	0.9	0.0659341	0.00302198	0.351685	0.255	19.6484	0.900549	104.802	75.99	85.1539	24.0318
304	maize (2010)	none	0	none	none	96.6	335	420	8.24	14.7	0.9	0.106897	0.00258621	0.0388889	0.028	31.8552	0.77069	11.5889	8.344	20.2663	2.64984
304	maize (2010)	urea	180	surface	none	96.6	335	420	8.24	14.7	0.9	0.106897	0.00258621	0.128261	0.028	31.8552	0.77069	38.2217	8.344	6.36657	2.64984
304	maize (2010)	urea	180	subsurface	mulch	96.6	335	420	8.24	14.7	0.9	0.106897	0.00258621	0.141667	0.0316667	31.8552	0.77069	42.2167	9.43667	10.3615	2.99407
304	maize (2010)	OA	180	surface	mulch	96.6	335	420	8.24	14.7	0.9	0.106897	0.00258621	0.157798	0.0757143	31.8552	0.77069	47.0239	22.5629	15.1687	7.13916
304	maize (2010)	urea	180	surface	inhibitor	96.6	335	420	8.24	14.7	0.9	0.106897	0.00258621	0.0719626	0.0075	31.8552	0.77069	21.4449	2.235	10.4103	0.747609
304	maize (2010)	IU	180	surface	mulch	96.6	335	420	8.24	14.7	0.9	0.106897	0.00258621	0.183486	0.1	31.8552	0.77069	54.6789	29.8	22.8237	9.42674

## Sheet: Rice GWP
																				GWP
						Driving factors						yield scaled emission (kg N / Mg grains)				GWP (CO2-eq. /Mg grains)				Effect size
Id	Crop type	Fertilizer type	N rate	Application depth	Amendments	T	P	clay (g/kg)	pH	SOM (g/kg)	N (g/kg)	CK	SD	Treat	SD	CK	SD	Treat	SD	Mean	SD
279	early rice (2007)	none	0	none	none	101.6	610	375	7.1	18	2	0.012012	0.000750751	0.012012	0.00625	3.57958	0.223724	3.57958	1.8625	0	0.593208
279	early rice (2007)	urea	81.3	surface	none	101.6	610	375	7.1	18	2	0.012012	0.000750751	0.0231317	0.0084507	3.57958	0.223724	6.89324	2.51831	3.31366	0.799496
279	early rice (2007)	urea	81.3	surface	none	101.6	610	375	7.1	18	2	0.012012	0.000750751	0.0308789	0.00223881	3.57958	0.223724	9.2019	0.667164	5.62232	0.222522
279	early rice (2007)	urea	81.3	subsurface	none	101.6	610	375	7.1	18	2	0.012012	0.000750751	0.0056899	0.000961538	3.57958	0.223724	1.69559	0.286538	1.88399	0.114959
279	early rice (2007)	OA	79.3	surface	none	101.6	610	375	7.1	18	2	0.012012	0.000750751	0.0249716	0.00833333	3.57958	0.223724	7.44154	2.48333	3.86196	0.788479
279	early rice (2007)	OA	42.1	surface	none	101.6	610	375	7.1	18	2	0.012012	0.000750751	0.00662252	0.02	3.57958	0.223724	1.97351	5.96	1.60607	1.88604
279	early rice (2008)	none	0	none	none	101.6	610	375	7.1	18	2	0.013289	0.000830565	0.0199336	0.0232558	3.96013	0.247508	5.9402	6.93023	1.98007	2.19293
279	early rice (2008)	urea	81.3	surface	none	101.6	610	375	7.1	18	2	0.013289	0.000830565	0.039548	0.0189189	3.96013	0.247508	11.7853	5.63784	7.82518	1.78456
279	early rice (2008)	urea	81.3	surface	none	101.6	610	375	7.1	18	2	0.0152091	0.00095057	0.0760456	0.00326087	4.53232	0.28327	22.6616	0.971739	18.1293	0.320081
279	early rice (2008)	urea	81.3	subsurface	none	101.6	610	375	7.1	18	2	0.0152091	0.00095057	0.0200927	0.0114754	4.53232	0.28327	5.98764	3.41967	1.45532	1.0851
279	early rice (2008)	OA	79.3	surface	none	101.6	610	375	7.1	18	2	0.0152091	0.00095057	0.0425532	0.00375	4.53232	0.28327	12.6809	1.1175	8.14853	0.364561
279	early rice (2008)	OA	42.1	surface	none	101.6	610	375	7.1	18	2	0.0152091	0.00095057	0.0496324	0.0153846	4.53232	0.28327	14.7904	4.58462	10.2581	1.45255
279	early rice (2009)	none	0	none	none	101.6	610	375	7.1	18	2	0.0182648	0.00114155	0.0639269	0.0352941	5.44292	0.340183	19.0502	10.5176	13.6073	3.32771
279	early rice (2009)	urea	81.3	surface	none	101.6	610	375	7.1	18	2	0.0182648	0.00114155	0.0241228	0.0169492	5.44292	0.340183	7.1886	5.05085	1.74567	1.60084
279	early rice (2009)	urea	81.3	surface	none	101.6	610	375	7.1	18	2	0.0199005	0.00124378	0.104478	0.00526316	5.93035	0.370647	31.1343	1.56842	25.204	0.509639
279	early rice (2009)	urea	81.3	subsurface	none	101.6	610	375	7.1	18	2	0.0199005	0.00124378	0.0398482	0.0285714	5.93035	0.370647	11.8748	8.51429	5.94441	2.695
279	early rice (2009)	OA	79.3	surface	none	101.6	610	375	7.1	18	2	0.0199005	0.00124378	0.0168919	0.0136364	5.93035	0.370647	5.03378	4.06364	0.896564	1.29037
279	early rice (2009)	OA	42.1	surface	none	101.6	610	375	7.1	18	2	0.0199005	0.00124378	0.0447227	0.00434783	5.93035	0.370647	13.3274	1.29565	7.39702	0.426156
279	late rice (2007)	none	0	none	none	92.6	510.2	375	7.1	18	2	0.0149254	0.000870647	0.00691244	0.00843373	4.44776	0.259453	2.05991	2.51325	2.38785	0.798984
279	late rice (2007)	urea	101.7	surface	none	92.6	510.2	375	7.1	18	2	0.0149254	0.000870647	0.0409357	0.0132353	4.44776	0.259453	12.1988	3.94412	7.75107	1.24994
279	late rice (2007)	urea	101.7	surface	none	92.6	510.2	375	7.1	18	2	0.0149254	0.000870647	0.0529532	0.0176991	4.44776	0.259453	15.78	5.27434	11.3323	1.66991
279	late rice (2007)	urea	101.7	subsurface	none	92.6	510.2	375	7.1	18	2	0.0149254	0.000870647	0.0175159	0.018	4.44776	0.259453	5.21975	5.364	0.771984	1.69823
279	late rice (2007)	OA	103.7	surface	none	92.6	510.2	375	7.1	18	2	0.0149254	0.000870647	0.0826709	0.0131579	4.44776	0.259453	24.6359	3.92105	20.1882	1.24266
279	late rice (2007)	OA	80	surface	none	92.6	510.2	375	7.1	18	2	0.0149254	0.000870647	0.0445545	0.005	4.44776	0.259453	13.2772	1.49	8.82947	0.478269
279	late rice (2008)	none	0	none	none	92.6	510.2	375	7.1	18	2	0.0149254	0.000870647	0.0298103	0.000434783	4.44776	0.259453	8.88347	0.129565	4.43571	0.0917076
279	late rice (2008)	urea	101.7	surface	none	92.6	510.2	375	7.1	18	2	0.0149254	0.000870647	0.0688889	0.0036	4.44776	0.259453	20.5289	1.0728	16.0811	0.349029
279	late rice (2008)	urea	101.7	surface	none	92.6	510.2	375	7.1	18	2	0.0149254	0.000870647	0.0377358	0.00344828	4.44776	0.259453	11.2453	1.02759	6.79752	0.335149
279	late rice (2008)	urea	101.7	subsurface	none	92.6	510.2	375	7.1	18	2	0.0149254	0.000870647	0.00773694	0.0454545	4.44776	0.259453	2.30561	13.5455	2.14215	4.28423
279	late rice (2008)	OA	103.7	surface	none	92.6	510.2	375	7.1	18	2	0.0149254	0.000870647	0.0531136	0.040625	4.44776	0.259453	15.8278	12.1063	11.3801	3.82921
279	late rice (2008)	OA	80	surface	none	92.6	510.2	375	7.1	18	2	0.0149254	0.000870647	0.0295749	0.0158333	4.44776	0.259453	8.81331	4.71833	4.36555	1.49432
279	late rice (2009)	none	0	none	none	92.6	510.2	375	7.1	18	2	0.0149254	0.000870647	0.030303	0.0108696	4.44776	0.259453	9.0303	3.23913	4.58254	1.02758
279	late rice (2009)	urea	101.7	surface	none	92.6	510.2	375	7.1	18	2	0.0149254	0.000870647	0.0808511	0.00888889	4.44776	0.259453	24.0936	2.64889	19.6459	0.841661
279	late rice (2009)	urea	101.7	surface	none	92.6	510.2	375	7.1	18	2	0.0107143	0.000625	0.0392857	0.0207317	3.19286	0.18625	11.7071	6.17805	8.51429	1.95456
279	late rice (2009)	urea	101.7	subsurface	none	92.6	510.2	375	7.1	18	2	0.0107143	0.000625	0.0631579	0.065	3.19286	0.18625	18.8211	19.37	15.6282	6.12561
279	late rice (2009)	OA	103.7	surface	none	92.6	510.2	375	7.1	18	2	0.0107143	0.000625	0.0821643	0.0228571	3.19286	0.18625	24.485	6.81143	21.2921	2.15477
279	late rice (2009)	OA	80	surface	none	92.6	510.2	375	7.1	18	2	0.0107143	0.000625	0.0471092	0.0409091	3.19286	0.18625	14.0385	12.1909	10.8457	3.85555
283	rice	none	0	none	none	96.8	706.3	390	6.5	27.3	1.8	0.0232558	0.00203488	0.0883721	0.00368421	6.93023	0.606395	26.3349	1.09789	19.4047	0.396622
283	rice	none	0	surface	biochar	96.8	706.3	390	6.5	27.3	1.8	0.0232558	0.00203488	0.0572917	0.00307692	6.93023	0.606395	17.0729	0.916923	10.1427	0.34763
283	rice	none	0	surface	biochar	96.8	706.3	390	6.5	27.3	1.8	0.0232558	0.00203488	0.0612245	0.00269231	6.93023	0.606395	18.2449	0.802308	11.3147	0.318027
283	rice	urea	300	surface	none	96.8	706.3	390	6.5	27.3	1.8	0.0232558	0.00203488	0.218681	0.00625	6.93023	0.606395	65.167	1.8625	58.2368	0.619405
283	rice	urea	300	surface	biochar	96.8	706.3	390	6.5	27.3	1.8	0.0232558	0.00203488	0.120202	0.000454545	6.93023	0.606395	35.8202	0.135455	28.89	0.196485
283	rice	urea	300	subsurface	biochar	96.8	706.3	390	6.5	27.3	1.8	0.0232558	0.00203488	0.0960784	0.00555556	6.93023	0.606395	28.6314	1.65556	21.7011	0.557546
284	rice	urea	250	surface	inhibitor	106.5	520	540	6.8	19.2	1.5	0.179688	0.00830078	0.126374	0.00586207	53.5469	2.47363	37.6593	1.7469	15.8875	0.957628
284	rice	urea	250	surface	inhibitor	106.5	520	540	6.8	19.2	1.5	0.179688	0.00830078	0.193464	0.004	53.5469	2.47363	57.6523	1.192	4.10541	0.868316
284	rice	urea	250	subsurface	inhibitor	106.5	520	540	6.8	19.2	1.5	0.179688	0.00830078	0.271016	0.0213333	53.5469	2.47363	80.7629	6.35733	27.216	2.15719
285	rice	none	0	none	none	95.6	819	140	5.7	15.6	1.32	0.0222222	0.00208333	0.0222222	0.00208333	6.62222	0.620833	6.62222	0.620833	0	0.277645
285	rice	urea	250	surface	none	95.6	819	140	5.7	15.6	1.32	0.0222222	0.00208333	0.0387188	0.00791975	6.62222	0.620833	11.5382	2.36008	4.91597	0.771715
285	rice	urea	250	subsurface	mulch	95.6	819	140	5.7	15.6	1.32	0.0222222	0.00208333	0.0315016	0.00175009	6.62222	0.620833	9.38747	0.521526	2.76525	0.256403
288	rice	none	0	none	none	102.2	706	500	7.9	13.05	1.96	0.029654	0.000411862	0.029654	0.00166667	8.8369	0.122735	8.8369	0.496667	0	0.161784
288	rice	OCF	180	surface	none	102.2	706	500	7.9	13.05	1.96	0.029654	0.000411862	0.0282209	0.000689655	8.8369	0.122735	8.40982	0.205517	0.427087	0.0756975
288	rice	OA	180	surface	none	102.2	706	500	7.9	13.05	1.96	0.029654	0.000411862	0.0272109	0.000526316	8.8369	0.122735	8.10884	0.156842	0.728059	0.0629788
288	rice	OA	180	surface	none	102.2	706	500	7.9	13.05	1.96	0.029654	0.000411862	0.025	0.000294118	8.8369	0.122735	7.45	0.0876471	1.3869	0.0476926
288	rice	OA	180	surface	none	102.2	706	500	7.9	13.05	1.96	0.029654	0.000411862	0.0375758	0.00162602	8.8369	0.122735	11.1976	0.484553	2.36067	0.158068
294	rice	none	0	none	none	102.2	692	143	5.7	16.55	1.32	0.0229885	0.00107759	0.0229885	0.005	6.85057	0.321121	6.85057	1.49	0	0.481998
294	rice	urea	220	surface	none	102.2	692	143	5.7	16.55	1.32	0.0229885	0.00107759	0.044	0.00789474	6.85057	0.321121	13.112	2.35263	6.26143	0.750866
294	rice	none	0	none	mulch	102.2	692	143	5.7	16.55	1.32	0.0229885	0.00107759	0.0154394	0.00666667	6.85057	0.321121	4.60095	1.98667	2.24962	0.636393
294	rice	urea	220	subsurface	mulch	102.2	692	143	5.7	16.55	1.32	0.0229885	0.00107759	0.0192705	0	6.85057	0.321121	5.7426	0	1.10797	0.101548
295	rice	none	0	none	none	102.2	692	272	7.99	20.88	1.16	0.00585938	4.88281e-05	0.00585938	4.62963e-05	1.74609	0.0145508	1.74609	0.0137963	0	0.00634084
295	rice	OCF	100	surface	none	102.2	692	272	7.99	20.88	1.16	0.00585938	4.88281e-05	0.00669344	6.89655e-05	1.74609	0.0145508	1.99465	0.0205517	0.248551	0.00796303
295	rice	OCF	300	surface	none	102.2	692	272	7.99	20.88	1.16	0.00585938	4.88281e-05	0.0385569	0.00193548	1.74609	0.0145508	11.4899	0.576774	9.74385	0.18245
295	rice	urea	100	surface	none	102.2	692	272	7.99	20.88	1.16	0.00585938	4.88281e-05	0.00498231	7.50188e-05	1.74609	0.0145508	1.48473	0.0223556	0.261365	0.00843503
295	rice	urea	300	surface	none	102.2	692	272	7.99	20.88	1.16	0.00585938	4.88281e-05	0.0229167	8.99685e-05	1.74609	0.0145508	6.82918	0.0268106	5.08309	0.00964642
296	rice	none	0	none	none	94.6	550.2	272	7.99	20.88	1.16	0.0059761	4.98008e-05	0.123506	0.005	1.78088	0.0148406	36.8048	1.49	35.0239	0.471203
296	rice	urea	100	surface	none	94.6	550.2	272	7.99	20.88	1.16	0.0059761	4.98008e-05	0.143429	0.00769231	1.78088	0.0148406	42.7418	2.29231	40.961	0.724907
296	rice	urea	200	surface	none	94.6	550.2	272	7.99	20.88	1.16	0.0059761	4.98008e-05	0.112022	0.00428571	1.78088	0.0148406	33.3825	1.27714	31.6016	0.403895
296	rice	urea	200	subsurface	none	94.6	550.2	272	7.99	20.88	1.16	0.0059761	4.98008e-05	0.0982736	0.00316456	1.78088	0.0148406	29.2855	0.943038	27.5046	0.298252
296	rice	urea	300	surface	none	94.6	550.2	272	7.99	20.88	1.16	0.0059761	4.98008e-05	0.114532	0.00478261	1.78088	0.0148406	34.1305	1.42522	32.3497	0.450718
297	rice	none	0	none	none	99.5	600	510	6.7	14.88	1.1	0.286307	0.000518672	0.286307	0.00117647	85.3195	0.154564	85.3195	0.350588	0	0.121162
297	rice	urea	150	surface	none	99.5	600	510	6.7	14.88	1.1	0.286307	0.000518672	0.436275	0.00583333	85.3195	0.154564	130.01	1.73833	44.6903	0.551878
297	rice	urea	300	surface	none	99.5	600	510	6.7	14.88	1.1	0.286307	0.000518672	0.525444	0.00751174	85.3195	0.154564	156.582	2.2385	71.2627	0.709561
297	rice	urea	450	surface	none	99.5	600	510	6.7	14.88	1.1	0.286307	0.000518672	0.668472	0.0134615	85.3195	0.154564	199.205	4.01154	113.885	1.2695
297	rice	urea	150	surface	mulch	99.5	600	510	6.7	14.88	1.1	0.286307	0.000518672	0.459824	0.000813008	85.3195	0.154564	137.027	0.242276	51.7079	0.0908779
298	rice (2008)	none	0	none	none	101.6	620.5	140	6.91	12.36	1.7	0.0151515	0.000757576	0.0151515	0.005	4.51515	0.225758	4.51515	1.49	0	0.476557
298	rice (2008)	urea	240	surface	none	101.6	620.5	141	6.91	12.36	1.7	0.0151515	0.000757576	0.0348936	0.00333333	4.51515	0.225758	10.3983	0.993333	5.88315	0.32213
298	rice (2008)	urea	240	surface	inhibitor	101.6	620.5	142	6.91	12.36	1.7	0.0151515	0.000757576	0.0516867	0.0116667	4.51515	0.225758	15.4027	3.47667	10.8875	1.10173
298	rice (2009)	none	0	none	none	101.6	620.5	143	6.91	12.36	1.7	0.016129	0.000806452	0.0156452	0.005	4.80645	0.240323	4.66226	1.49	0.144194	0.477269
298	rice (2009)	urea	240	surface	none	101.6	620.5	144	6.91	12.36	1.7	0.016129	0.000806452	0.0619178	0.0166667	4.80645	0.240323	18.4515	4.96667	13.6451	1.57244
298	rice (2009)	urea	240	surface	inhibitor	101.6	620.5	145	6.91	12.36	1.7	0.016129	0.000806452	0.0288608	0.005	4.80645	0.240323	8.60051	1.49	3.79405	0.477269
298	rice (2010)	none	0	none	none	101.6	620.5	146	6.91	12.36	1.7	0.0153846	0.000769231	0.0643077	0.01	4.58462	0.229231	19.1637	2.98	14.5791	0.945143
298	rice (2010)	urea	240	surface	none	101.6	620.5	147	6.91	12.36	1.7	0.0153846	0.000769231	0.2532	0.005	4.58462	0.229231	75.4536	1.49	70.869	0.476723
298	rice (2010)	urea	240	surface	inhibitor	101.6	620.5	148	6.91	12.36	1.7	0.0153846	0.000769231	0.207778	0.004	4.58462	0.229231	61.9178	1.192	57.3332	0.38385
298	rice (2011)	none	0	none	none	101.6	620.5	149	6.91	12.36	1.7	0.0144928	0.000724638	0.0307246	0.005	4.31884	0.215942	9.15594	1.49	4.8371	0.476102
298	rice (2011)	urea	240	surface	none	101.6	620.5	150	6.91	12.36	1.7	0.0144928	0.000724638	0.100824	0.01	4.31884	0.215942	30.0454	2.98	25.7266	0.94483
298	rice (2011)	urea	240	surface	inhibitor	101.6	620.5	151	6.91	12.36	1.7	0.0144928	0.000724638	0.0837662	0.03	4.31884	0.215942	24.9623	8.94	20.6435	2.8279
299	early rice (2012)	none	0	none	none	101.6	830.5	404	5.4	14.95	1.46	0.00781893	0.000102881	0.00781893	0.0004	2.33004	0.0306584	2.33004	0.1192	0	0.0389212
299	early rice (2012)	urea	150	subsurface	mulch	101.6	830.5	404	5.4	14.95	1.46	0.00781893	0.000102881	0.00765697	0.0003125	2.33004	0.0306584	2.28178	0.093125	0.0482647	0.0310036
299	early rice (2012)	urea	150	subsurface	none	101.6	830.5	404	5.4	14.95	1.46	0.00781893	0.000102881	0.0119938	0.00025	2.33004	0.0306584	3.57414	0.0745	1.2441	0.0254759
299	early rice (2013)	none	0	none	none	101.6	830.5	404	5.4	14.95	1.46	0.0077551	0.000102041	0.00857143	0.000277778	2.31102	0.0304082	2.55429	0.0827778	0.243265	0.0278869
299	early rice (2013)	urea	150	subsurface	mulch	101.6	830.5	404	5.4	14.95	1.46	0.0077551	0.000102041	0.0139394	0.00027027	2.31102	0.0304082	4.15394	0.0805405	1.84292	0.027224
299	early rice (2013)	urea	150	subsurface	none	101.6	830.5	404	5.4	14.95	1.46	0.0077551	0.000102041	0.00858896	0.000151515	2.31102	0.0304082	2.55951	0.0451515	0.248489	0.0172143
299	late rice (2012)	none	0	none	none	101.6	830.5	404	5.4	14.95	1.46	0.008	0.000105263	0.0151579	0.0002	2.384	0.0313684	4.51705	0.0596	2.13305	0.0212982
299	late rice (2012)	urea	150	subsurface	mulch	101.6	830.5	404	5.4	14.95	1.46	0.008	0.000105263	0.024252	7.57576e-05	2.384	0.0313684	7.22709	0.0225758	4.84309	0.0122215
299	late rice (2012)	urea	150	subsurface	none	101.6	830.5	404	5.4	14.95	1.46	0.008	0.000105263	0.0163333	7.0922e-05	2.384	0.0313684	4.86733	0.0211348	2.48333	0.011961
299	late rice (2013)	none	0	none	none	101.6	830.5	404	5.4	14.95	1.46	0.0077551	0.000102041	0.0163265	0.000352941	2.31102	0.0304082	4.86531	0.105176	2.55429	0.0346219
299	late rice (2013)	urea	150	subsurface	mulch	101.6	830.5	404	5.4	14.95	1.46	0.0077551	0.000102041	0.0231742	0.000416667	2.31102	0.0304082	6.9059	0.124167	4.59488	0.0404253
299	late rice (2013)	urea	150	subsurface	none	101.6	830.5	404	5.4	14.95	1.46	0.0077551	0.000102041	0.0164634	0.00010989	2.31102	0.0304082	4.9061	0.0327473	2.59508	0.0141317
300	rice (2012)	none	0	none	none	100.2	548.4	198	6	13.33	1.31	0.0221402	0.000461255	0.0221402	0.0005	6.59779	0.137454	6.59779	0.149	0	0.064105
300	rice (2012)	urea	150	surface	surface	100.2	548.4	198	6	13.33	1.31	0.0221402	0.000461255	0.144543	0.003125	6.59779	0.137454	43.0737	0.93125	36.476	0.297678
300	rice (2012)	urea	150	subsurace	subsurace	100.2	548.4	198	6	13.33	1.31	0.0221402	0.000461255	0.128467	0.00111111	6.59779	0.137454	38.2832	0.331111	31.6854	0.11337
300	rice (2012)	none	0	none	none	100.2	548.4	198	6	13.33	1.31	0.0193861	0.000403877	0.0387722	0.00125	5.77706	0.120355	11.5541	0.3725	5.77706	0.123791
300	rice (2012)	urea	150	surface	none	100.2	548.4	198	6	13.33	1.31	0.0193861	0.000403877	0.22865	0.0088	5.77706	0.120355	68.1377	2.6224	62.3607	0.830149
300	rice (2012)	OA	75	surface	OA	100.2	548.4	198	6	13.33	1.31	0.0193861	0.000403877	0.0851351	0.00133333	5.77706	0.120355	25.3703	0.397333	19.5932	0.131286
300	rice (2012)	none	0	none	none	100.2	548.4	198	6	13.33	1.31	0.0189573	0.000394945	0.0663507	0.00357143	5.64929	0.117694	19.7725	1.06429	14.1232	0.338608
300	rice (2012)	urea	150	subsurface	none	100.2	548.4	198	6	13.33	1.31	0.0189573	0.000394945	0.370771	0.0124324	5.64929	0.117694	110.49	3.70486	104.841	1.17217
300	rice (2012)	OA	75	subsurface	OA	100.2	548.4	198	6	13.33	1.31	0.0189573	0.000394945	0.0906593	0.0154545	5.64929	0.117694	27.0165	4.60545	21.3672	1.45685
300	rice (2013)	none	0	none	none	100.2	548.4	198	6	13.33	1.31	0.0293663	0.00193199	0.0293663	0.00192308	8.75116	0.575734	8.75116	0.573077	0	0.256883
300	rice (2013)	urea	150	surface	surface	100.2	548.4	198	6	13.33	1.31	0.0293663	0.00193199	0.282235	0.032	8.75116	0.575734	84.106	9.536	75.3549	3.02104
300	rice (2013)	urea	150	subsurace	subsurace	100.2	548.4	198	6	13.33	1.31	0.0293663	0.00193199	0.254676	0.015	8.75116	0.575734	75.8935	4.47	67.1424	1.42521
300	rice (2013)	none	0	none	none	100.2	548.4	198	6	13.33	1.31	0.0283019	0.00117925	0.0283019	0.00176471	8.43396	0.351415	8.43396	0.525882	0	0.200011
300	rice (2013)	urea	150	surface	none	100.2	548.4	198	6	13.33	1.31	0.0283019	0.00117925	0.402036	0.00470588	8.43396	0.351415	119.807	1.40235	111.373	0.457175
300	rice (2013)	OA	75	surface	OA	100.2	548.4	198	6	13.33	1.31	0.0283019	0.00117925	0.0474968	0.00785714	8.43396	0.351415	14.154	2.34143	5.72008	0.748718
300	rice (2013)	none	0	none	none	100.2	548.4	198	6	13.33	1.31	0.028125	0.00117187	0.04375	0.00222222	8.38125	0.349219	13.0375	0.662222	4.65625	0.236747
300	rice (2013)	urea	150	subsurface	none	100.2	548.4	198	6	13.33	1.31	0.028125	0.00117187	0.474227	0.0311111	8.38125	0.349219	141.32	9.27111	132.938	2.93386
300	rice (2013)	OA	75	subsurface	OA	100.2	548.4	198	6	13.33	1.31	0.028125	0.00117187	0.0988447	0.0016	8.38125	0.349219	29.4557	0.4768	21.0745	0.186894
300	rice (2014)	none	0	none	none	100.2	548.4	198	6	13.33	1.31	0.0176056	0.00132042	0.0176056	0.003	5.24648	0.393486	5.24648	0.894	0	0.30888
300	rice (2014)	urea	150	surface	surface	100.2	548.4	198	6	13.33	1.31	0.0176056	0.00132042	0.261669	0.0244444	5.24648	0.393486	77.9774	7.28444	72.7309	2.3069
300	rice (2014)	urea	150	subsurace	subsurace	100.2	548.4	198	6	13.33	1.31	0.0176056	0.00132042	0.190278	0.0263636	5.24648	0.393486	56.7028	7.85636	51.4563	2.48751
300	rice (2014)	none	0	none	none	100.2	548.4	198	6	13.33	1.31	0.0164745	0.00123558	0.0181219	0.00125	4.90939	0.368204	5.40033	0.3725	0.490939	0.165629
300	rice (2014)	urea	150	surface	none	100.2	548.4	198	6	13.33	1.31	0.0164745	0.00123558	0.813452	0.032	4.90939	0.368204	242.409	9.536	237.499	3.0178
300	rice (2014)	OA	75	surface	OA	100.2	548.4	198	6	13.33	1.31	0.0164745	0.00123558	0.20801	0.04	4.90939	0.368204	61.9871	11.92	57.0777	3.77123
300	rice (2014)	none	0	none	none	100.2	548.4	198	6	13.33	1.31	0.0171233	0.00128425	0.0291096	0.00384615	5.10274	0.382705	8.67466	1.14615	3.57192	0.382117
300	rice (2014)	urea	150	subsurface	none	100.2	548.4	198	6	13.33	1.31	0.0171233	0.00128425	0.889172	0.0432143	5.10274	0.382705	264.973	12.8779	259.871	4.07413
300	rice (2014)	OA	75	subsurface	OA	100.2	548.4	198	6	13.33	1.31	0.0171233	0.00128425	0.222947	0.0348	5.10274	0.382705	66.4381	10.3704	61.3353	3.28164
303	rice	none	0	none	none	88.5	450	230	5.99	22.11	1.81	0.0131265	0.00119332	0.0131265	0.00444444	3.91169	0.355609	3.91169	1.32444	0	0.43366
303	rice	none	0	surface	biochar	88.5	450	230	5.99	22.11	1.81	0.0131265	0.00119332	0.0134474	0.005	3.91169	0.355609	4.00733	1.49	0.0956405	0.484413
303	rice	none	0	subsurface	biochar	88.5	450	230	5.99	22.11	1.81	0.0131265	0.00119332	0.0205066	0.035	3.91169	0.355609	6.11098	10.43	2.19928	3.30017
303	rice	urea	240	surface	none	88.5	450	230	5.99	22.11	1.81	0.0131265	0.00119332	0.207965	0.06	3.91169	0.355609	61.9735	17.88	58.0618	5.65527
303	rice	urea	240	surface	biochar	88.5	450	230	5.99	22.11	1.81	0.0131265	0.00119332	0.147778	0.0711111	3.91169	0.355609	44.0378	21.1911	40.1261	6.70216
303	rice	urea	240	subsurface	biochar	88.5	450	230	5.99	22.11	1.81	0.0131265	0.00119332	0.0956044	0.28	3.91169	0.355609	28.4901	83.44	24.5784	26.3863
303	rice	none	0	none	none	98.8	560	236	6.21	20.76	1.79	0.0172414	0.0015674	0.0360502	0.0025	5.13793	0.467085	10.7429	0.745	5.60502	0.278063
303	rice	none	0	surface	biochar	98.8	560	236	6.21	20.76	1.79	0.0172414	0.0015674	0.0455975	0.01	5.13793	0.467085	13.5881	2.98	8.45012	0.953864
303	rice	none	0	subsurface	biochar	98.8	560	236	6.21	20.76	1.79	0.0141066	0.0015674	0.0141509	0.0056338	4.20376	0.467085	4.21698	1.67887	0.0132194	0.55107
303	rice	urea	240	surface	none	98.8	560	236	6.21	20.76	1.79	0.0141066	0.0015674	0.185987	0.166667	4.20376	0.467085	55.4242	49.6667	51.2204	15.7067
303	rice	urea	240	surface	biochar	98.8	560	236	6.21	20.76	1.79	0.0141066	0.0015674	0.136951	0.00769231	4.20376	0.467085	40.8114	2.29231	36.6076	0.739787
303	rice	urea	240	subsurface	biochar	98.8	560	236	6.21	20.76	1.79	0.0141066	0.0015674	0.0881273	0.00597015	4.20376	0.467085	26.2619	1.7791	22.0582	0.581668
303	rice	none	0	none	none	101.3	502	250	4.89	19.7	1.59	0.0134933	0.00149925	0.0134933	0.000714286	4.02099	0.446777	4.02099	0.212857	0	0.156498
303	rice	none	0	surface	biochar	101.3	502	250	4.89	19.7	1.59	0.0104948	0.000374813	0.0105581	0.000769231	3.12744	0.111694	3.1463	0.229231	0.0188684	0.0806364
303	rice	none	0	subsurface	biochar	101.3	502	250	4.89	19.7	1.59	0.0104948	0.000374813	0.0102941	0.000555556	3.12744	0.111694	3.06765	0.165556	0.0597892	0.063154
303	rice	urea	300	surface	none	101.3	502	250	4.89	19.7	1.59	0.0104948	0.000374813	0.185606	0.0134483	3.12744	0.111694	55.3106	4.00759	52.1832	1.2678
303	rice	urea	300	surface	biochar	101.3	502	250	4.89	19.7	1.59	0.0104948	0.000374813	0.0948379	0.00571429	3.12744	0.111694	28.2617	1.70286	25.1343	0.539648
303	rice	urea	300	subsurface	biochar	101.3	502	250	4.89	19.7	1.59	0.0104948	0.000374813	0.0795322	0.005	3.12744	0.111694	23.7006	1.49	20.5731	0.472501

## Sheet: References
	1- Roelcke, M., Li, S.X., Tian, X.H., Gao, Y.J., Richter, J., 2002. In-situ comparisons of ammonia volatilization from N fertilizers in Chinese loess soils. Nutrient Cycling in Agroecosystems, 62:73–88. https://www.researchgate.net/publication/225741244.
	2- Han, H., Zhou, C.J., Wang, L., 2014. Reducing ammonia volatilization from maize fields with separation of nitrogen fertilizer and water in an alternating furrow irrigation system. Journal of Integrative Agriculture, 13(5): 1099-1112. doi: 10.1016/S2095-3119(13)60493-1.
	3- Li, Q., Yang, A., Wang, Z., Roelcke, M., Chen, X., Zhang, F.S., et al., 2015. Effect of a new urease inhibitor on ammonia volatilization and nitrogen utilization in wheat in north and northwest China. Field Crop Res., 175:96–105. doi: org/10.1016/j.fcr.2015.02.005.
	4- Denmead, et al., 2010. Loss of nitrogen by ammonia volatilization and NOx emission after application of urea to irrigated maize in Shanxi Province, China. © 2010 19th World Congress of Soil Science, Soil Solutions fora Changing World, 1 – 6 August 2010, Brisbane, Australia. Published on DVD. https://www.researchgate.net/publication/265111515.
	5- Li, Y., Huang, L., Zhang, H., Wang, M., Liang, Z., 2017. Assessment of ammonia volatilization losses and nitrogen utilization during the rice growing season in alkaline salt-affected soils. Sustain., 9. doi: org/10.3390/su9010132.
	6- Sun J., Zhou W., Ji, Y., 2016. Monitoring of nitrogen cycling and balance in maize monoculture agro-ecosystem in northeast China black soil," 2016 Fifth International Conference on Agro-Geoinformatics (Agro-Geoinformatics), Tianjin, 1-5. http://ieeexplore.ieee.org/stamp/stamp.jsp?tp=&arnumber=7577704&isnumber=7577593.
	7- Chen A., Lei, B., Hu, W., Lu, Y., Mao, Y., Duan, Z., 2015. Characteristics of ammonia volatilization on rice grown under different nitrogen application rates and itsquantitative predictions in Erhai Lake Watershed, China. Nutr. Cycl. Agroecosyst, 101: 139–152. doi: 10.1007/s10705-014-9660-7.
	8- Liang, K.M., Zhong, X.H., Huang, N.R., Lampayan, R.M., Liu, Y.Z., Pan, J.F., Peng, B.L., Hu, X.Y., Fu, Y.Q., 2017. Nitrogen losses and greenhouse gas emissions under different N and water management in a subtropical double-season rice cropping system. Sci. Total Environ., 609, 46–57. doi: org/10.1016/j.scitotenv.2017.07.118.
	9- Ahmed, M., Yu, W.J., Lei, M., Raza, S., Zhou, J.B., (2018): Mitigation of ammonia volatilization with application of urease and nitrification inhibitors from summer maize at the Loess Plateau. Plant Soil Environ., 64. doi: org/10.17221/46/2018-PSE
	10- Zhang, T., Liu, H.B., Luo, J.F., Wang, H.Y., Zhai, L.M., Geng, Y.C., Zhang, Y.T., Li, J.G., Lei, Q.L., Bashir, M.A., Wu, S.X., Lindsey, S., 2018. Long-term manure application increased greenhouse gas emissions but had no effect on ammonia volatilization in a Northern China upland field. Sci. Total Environ., 633, 230–239. doi: org/10.1016/j.scitotenv.2018.03.069.
	11- Wang, H., Zhang, Y., Chen, A., Liu, H., Zhai, L., Lei, B., et al., 2017. An optimal regional nitrogen application threshold for wheat in the North China Plain considering yield and environmental effects. Field Crop Res., 207, 52–61. doi: org/10.1016/j.fcr.2017.03.002
	12- Wang, Z., Liu, X., Ju, X., Zhang, F., Malhi, S.S., 2004. Ammonia volatilization loss from surface-broadcast urea: comparison of vented- and closed-chamber methods and loss in winter wheat–summer maize rotation in North China Plain, Communications in Soil Science and Plant Analysis, 35:19-20, 2917-2939, doi: 10.1081/CSS-200036499.
	13- Liu, X., Ju, X., Zhang, F., Pan, J., Christie, P., 2003. Nitrogen dynamics and budgets in a winter wheat–maize cropping system in the North China Plain. Field Crops Research, 83 (2003) 111–124. doi: 10.1016/S0378-4290(03)00068-6.
	14- Yang, Q., Liu, P., Dong, S., Zhang, J., Zhao, B., 2019. Effects of fertilizer type and rate on summer maize grain yield and ammonia volatilization loss in northern China. Journal of Soils and Sediments. doi: org/10.1007/s11368-019-02254-1.
	15- Yang, Y., Zhou, C.J., Li, N., Han, K., Meng, Y., Tian, X.X., Wang, L.Q., 2015. Effects of conservation tillage practices on ammonia emissions from Loess Plateau rain-fed winter wheat fields. Atmos. Environ., 104, 59–68. doi: org/10.1016/j.atmosenv.2015.01.007.
	17- Liu, T.Q., Fan, D.J., Zhang, X.X., Chen, J., Li, C.F., Cao, C.G., 2015. Deep placement of nitrogen fertilizers reduces ammonia volatilization and increases nitrogen utilization efficiency in no-tillage paddy fields in central China. Field Crops Research, 184: 80–90. doi: org/10.1016/j.fcr.2015.09.011.
	18- Li, P.F., Lu, J.W., Wang, Y., Wang, S., Hussain, S., Ren, T., Cong, R., Li, X.K., 2018. Nitrogen losses, use efficiency, and productivity of early rice under controlled-release urea. Agric. Ecosyst. Environ., 251, 78–87. doi: org/10.1016/j.agee.2017.09.020.
	19- Guo, C., Ren, T., Li, P., et al., 2019. Producing more grain yield of rice with less ammonia volatilization and greenhouse gases emission using slow/controlled-release urea. Environ. Sci. Pollut. Res., 26: 2569. doi: org/10.1007/s11356-018-3792-2.
	20- Liu, T., Huang, J., Chai, K., Cao, C., Li, C., 2018. Effects of N fertilizer sources and tillage practices on NH3 volatilization, grain yield, and N use efficiency of rice fields in Central China. Front. Plant Sci., 9:385. doi: 10.3389/fpls.2018.00385.
	21- Qi, W., Wu, W., Shah, F., et al., 2012. Ammonia volatilization from urea-application influenced germination and early seedling growth of dry direct-seeded rice. The Scientific World Journal, vol., 2012, Article ID., 857472, 7 pages, 2012. doi: org/10.1100/2012/857472.
	22- Huang, J., Duan, Y., Xu, M., Zhai, L., Zhang, X., Wang, B., Zhang, Y., Gao, S., Sun, N., 2017. Nitrogen mobility, ammonia volatilization, and estimated leaching loss from long-term manure incorporation in red soil. J. Integr. Agric., 16, 2082–2092. doi: 10.1016/S2095-3119(16)61498-3.
	23- Li, H., Liang, X., Chen, Y., Tian, G., Zhang, Z., 2008. Ammonia volatilization from urea in rice fields with zero-drainage water management. Agric. Water Manag., 95, 887–894. doi: 10.1016/j.agwat.2007.05.016.
	24- Sun, L.Y., Wu, Z., Ma, Y.C., Liu, Y.L., Xiong, Z.Q., 2018. Ammonia volatilization and atmospheric N deposition following straw and urea application from a rice-wheat rotation in southeastern China. Atmos. Environ., 181, 97-105. doi: org/10.1016/j.atmosenv.2018.02.050.
	25- Tian, G., Cai, Z., Cao, J., Li, X., 2001. Factors affecting ammonia volatilisation from a rice-wheat rotation system. Chemosphere., 42(2):123–9. [PubMed] [Google Scholar].
	26- Xu, J.Z., Liao, L.X., Tan, J.Y., Shao, X.H., 2013. Ammonia volatilization in gemmiparous and early seedling stages from direct seeding rice fields with different nitrogen management strategies: a pots experiment. Soil Till. Res., 126, 169–176. doi: org/10.1016/j.still.2012.07.005.
	27- Sun, H., Zhang, H., Powlson, D., Min, J., Shi, W., 2015. Rice production: nitrous oxide emission and ammonia volatilization as impacted by the nitrification inhibitor 2- chloro-6-(trichloromethyl)-pyridine. Field Crop Res., 173, 1–7. doi: org/10.1016/j.fcr.2014.12.012.
	28- He, T.H., Liu, D.Y., Yuan, J.J., Lou, J.F., Lindsey, S., Bolan, N., Ding, W.X., 2018. Effects of application of inhibitors and biochar to fertilizer on gaseous nitrogen emissions from an intensively managed wheat field. Sci. Total Environ., 628–629, 121–130. doi: org/10.1016/j.scitotenv.2018.02.048.
	29- He, T.H., Liu, D.Y., Yuan, J.J., Kang, N., Zaman, M., Luo, J.F., Lindsey, S., Ding, W.X., 2018. A two years study on the combined effects of biochar and inhibitors on ammonia volatilization in an intensively managed rice field. Agric. Ecosyst. Environ., 264, 44–53. doi: org/10.1016/j.agee.2018.05.010.
	30- Xu, J., Peng, S., Yang, S., Wang, W., 2012. Ammonia volatilization losses from a rice paddy with different irrigation and nitrogen managements. Agricultural Water Management, 104, 184:192. doi: 10.1016/j.agwat.2011.12.013.
	31- Cao, Y., Tian, Y., Yin, B., Zhu, Z., 2013. Assessment of ammonia volatilization from paddy fields under crop management practices aimed to increase grain yield and N efficiency. Field Crops Research, 147. 23–31. doi: 10.1016/j.fcr.2013.03.015.
	32- Lin, D., Fan, X., Hu, F., Zhao, H., Luo, J., 2007. Ammonia volatilization and nitrogen utilization efficiency in response to urea application in rice fields of the Taihu lake region, China. Pedosphere, 17, 639–645. doi: org/10.1016/S1002-0160(07)60076-9.
	33- Xu, S., Hou, P., Xue, L., Wang, S., Yang, L., 2017. Treated domestic sewage irrigation significantly decreased the CH4, N2O and NH3 emissions from paddy fields with straw incorporation. Atmos. Environ., 169, 1–10. doi: org/10.1016/j.atmosenv.2017.09.009.
	34- Feng, Y.F., Sun, H.J., Xue, L.H., Liu, Y., Gao, Q., Lu, K.P., Yang, L.Z., 2017. Biochar applied at an appropriate rate can avoid increasing NH3 volatilization dramatically in rice paddy soil. Chemosphere, 168, 1277–1284. doi: org/10.1016/j.chemosphere.2016.11.151.
	35- Wang, J., Wang, D., Zhang, G., Wang, C., 2012. Effect of wheat straw application on ammonia volatilization from urea applied to a paddy field. Nutr. Cycl. Agroecosyst, 94:73–84. doi: 10.1007/s10705-012-9527-8.
	36- Sun, H., Zhang, H., Min, J., Feng, Y., Shi, W., 2016. Controlled-release fertilizer, floating duckweed, and biochar affect ammonia volatilization and nitrous oxide emission from rice paddy fields irrigated with nitrogen-rich wastewater. Paddy and water environment, 14, 105-111. doi: 10.1007/s10333-015-0482-2.
	37- Sun, H., Min, J., Zhang, H., Feng, J., Lu, K., Shi, W., Yu, M., Li, X., 2018. Biochar application mode influences nitrogen leaching and NH3 volatilization losses in a rice paddy soil irrigated with N-rich wastewater, Environmental Technology, 39:16, 2090-2096, doi: 10.1080/09593330.2017.1349839.
	38- Guangming, T., Jinliu, C., Zucong, C., Litao, R., 1998. Ammonia volatilization from winter wheat field top-dressed with urea. Pedosphere, 8(4): 331-336. ISSN: 1002- 0160/CN32-1315/P.
	39- Lin, Z., Dai, Q.G., Ye., S.C., Wu., F.G., Jia, Y.S., Chen, J.D., Xu, L.S., Zhang, H.C., Yang, Huo, Z.Y., Xu, K., Wang, H.Y., 2012. Effects of nitrogen application levels on ammonia volatilization and nitrogen utilization during rice season. Rice. Sci., 19, 125–134. doi: org/10.1016/S1672-6308(12)60031-6.
	40- Sun, H., Zhang, H., Xiao, H., Shi, W., Muller, K., Van Zwieten, L., Wang, H., 2019. Wheat straw biochar application increases ammonia volatilization from an urban compacted soil giving a short-term reduction in fertilizer nitrogen use efficiency. J. Soils Sediments, 19: 1624-1631. doi: org/10.1007/s11368-018-2169-y.
	41- Tang, Y., Li, X., Shen, W., Duan, Z., 2018. Effect of the slow-release nitrogen fertilizer oxamide on ammonia volatilization and nitrogen use efficiency in paddy soil. Agronomy , 8, 53. doi: 10.3390/agronomy8040053.
	43- Li, Q., Yang, A., Wang, Z., Roelcke, M., Chen, X., Zhang, F.S., et al., 2015. Effect of a new urease inhibitor on ammonia volatilization and nitrogen utilization in wheat in north and northwest China. Field Crop Res., 2015;175:96–105. doi: org/10.1016/j.fcr.2015.02.005.
	44- Sun, X., Zhong, T., Zhang, L., Zhang, K., Wu, W., 2019. Reducing ammonia volatilization from paddy field with rice straw derived biochar. Science of the Total Environment, 660: 512–518. doi: org/10.1016/j.scitotenv.2018.12.450.
	46- Li, Y., Chen, Y., Wu, C., Tang, X., Ji, X., 2015. Determination of optimum nitrogen application rates in Zhejiang Province, China, based on rice yields and ecological security. J. Integr. Agric., 14, 2426–2433. doi: 10.1016/S2095-3119(15)61168-6.
	47- Zhao, L., Wu, L., Dong, C., Li, Y., 2010. Rice yield, nitrogen utilization and ammonia volatilization as influenced by modified rice cultivation at varying nitrogen rates. Agricultural Sciences, 1, 10-16. doi: 10.4236/as.2010.11002.
	48- Sun, Y., Xia, G., He, Z., Wu, Q., Zheng, J., Li, Y., Wang, Y, Chen, T., Chi, D., 2019. Zeolite amendment coupled with alternate wetting and drying to reduce nitrogen loss and enhance rice production, Field Crops Research, 235: 95-103, doi: org/10.1016/j.fcr.2019.03.004.
	49- Cai, G., Zhu, Z., Trevitt, A., Freney, J., Simpson, J., 1986. Nitrogen loss from ammonium bicarbonate and urea fertilizers applied to flooded rice. Fertil. Res., 10, 203-215. doi: org/10.1007/BF01049350.
	51- Zhang, X., Wang, Q., Xu, J., Gilliam, F.S., Tremblay, N., Li, C., 2015. In situ nitrogen mineralization, nitrification, and ammonia volatilization in maize field fertilized with urea in Huanghuaihai region of northern China. PLoS., 1, 10, e0115649. doi: org/10.1371/journal.pone.0115649.
	52- Xu, M., Li, D., Li, J., Qin, D., Hosen, Y., Shen, H., Cong, R., He, X., 2013. Polyolefin-coated urea decreases ammonia volatilization in a double rice system of Southern China. Agron. J., 105, 277-284. doi: 10.2134/agronj2012.0222.
	53- Huang, P., Zhang, J., Zhu, A., Xin, X., Zhang, C., Ma, D., Yang, S., Mirza, Z., Wu, S., 2015. Coupled water and nitrogen (N) management as a key strategy for the mitigation of gaseous N losses in the Huang-Huai-Hai Plain. Biol. Fertil. Soils, 51, 333-342. doi: 10.1007/s00374-014-0981-0.
	54- Pacholski, A., Cai, G., Nieder, R., Richter, J., Fan, X., Zhu, Z., Roelcke, M., 2006. Calibration of a simple method for determining ammonia volatilization in the field–comparative measurements in Henan Province, China. Nutr. Cycl. Agroecosyst., 74, 259-273.doi: org/10.1007/s10705-006-9003-4.
	55- Liao, L., Shao, X., Ji, R., Wen, T., Xu, J., 2015. Ammonia volatilization from direct seeded later-rice fields as affected by irrigation and nitrogen managements. Int. J. Agric. Biol., 17, 582-588. doi: 10.17957/IJAB/17.3.14.636.
	57- Yang, Y., Zhang, M., Li, Y., Fan, X., Geng, Y., 2013. Controlled-release urea commingled with rice seeds reduced emission of ammonia and nitrous oxide in rice paddy soil. J. Environ. Qual., 42, 1661-1673. doi: 10.2134/jeq2013.06.0255.
	58- Li, H., Chen, Y., Liang, X., Lian, Y., Li, W., 2009. Mineral-nitrogen leaching and ammonia volatilization from a rice–rapeseed system as affected by 3, 4-dimethylpyrazole phosphate. J. Environ. Qual., 38, 2131-2137. doi: 10.2134/jeq2008.0476.
	59- Huang, M., Zhou, X., Chen, J., Cao, F., Jiang, L., Zou, Y., 2017. Interaction of changes in pH and urease activity induced by biochar addition affects ammonia volatilization on an acid paddy soil following application of urea. Communications in Soil Science and Plant Analysis, 48(1), 107-112. doi: org/10.1080/00103624.2016.1253725.
	60- Jiang, J., Fan, H., Pang, B., Zhang, J., Li, Z., Jiang, S., Wu, J., 2018. Assessment of reactive nitrogen mitigation potential of different nitrogen treatments under direct-seeded rice and wheat cropping system Environ Sci. Pollut. Res., 25: 20241. doi: org/10.1007/s11356-018-2104-1.
	61- Jing, J., Sun, X., Yang, Y., et al., 2017. Ammonia volatilization of winter wheat canopy under different nitrogen rates. Journal of Agro-Environment Science, 36（2）: 401-408. doi: 10.11654/jaes.2016-1233. (in Chinese with English abstract)
	62- Li, Q., Li, Y., Qiang, G., et al., 2015. Effect of conventional and optimized nitrogen fertilization on spring maize yield, ammonia volatilization and nitrogen balance in soil-maize system. Journal of Plant Nutrition & Fertilizer., doi: 10. 11674/zwyf.2015. 0303. (in Chinese with English abstract)
	63- Wu, Y., Sun, Y., Guo, Y., Huang, K., Zhang, H., Zhang, S., 2019. Impact of wheat straw and tobacco straw biochar on nitrification of nitrogen fertilizer and emission of N2O and NH3 [J/OL]. Journal of Northwest A & F University (Natural Science Edition), (11):1-7. doi: org/10.13207/j.cnki.jnwafu.2019.11.008. (in Chinese with English abstract)
	64- Yang, Y., Li, N., Wang, L., et al., 2015. Effects of ridge tillage practices on reducing ammonia volatilization from winter wheat fields in southern Loess Plateau of China． Research of Environmental Sciences，28(3): 431-439．doi: 10. 13198/j.issn. 1001-6929. (in Chinese with English abstract)
	65- Lei, Y., Wang, L., Xue, L., et al., 2009. Effect of alternative irrigation and fertilization on soil ammonia volatilization of summer maize. Transactions of the CSAE, 25(4): 41－46. (in Chinese with English abstract)
	66- Han, K., Zhang, J., Shangguan, Y., et al., 2011. Effects of water and nitrogen coupling on soil gaseous nitrogen emission under alternate irrigation and N placement. Environmental Science, 32 (6): 1557-1563. doi: 10.13227/j.hjkx.2011.06.015. (in Chinese with English abstract)
	67- Shangguan, Y.X., Shi, R.P., Han, K., et al., 2011. Study on ammonia volatilization in winter wheat field under ridge mulching. Agricultural Research in Arid areas, 29 (5): 163-168. (in Chinese with English abstract)
	68- Shangguan, Y.X., Shi, R.P., Li, N., et al., 2012. Factors influencing ammonia volatilization in a winter wheat field with plastic film mulched ridges and unmulched furrows. Pubmed, 33(6):1987-1993. doi: 10.13227/j.hjkx.2012.06.012. (in Chinese with English abstract)
	69- Li, H.M., Guan, C.L., Zhou, H.P., et al., 2007. Effect of fertilization on soil ammonia volatilization in spring corn fields. Chinese Journal of Eco-Agriculture, 5:76-79. (in Chinese with English abstract)
	70- Li, Y., Wang, Y., Feng, G., et al., 2016. Effect of different fertilization management on nitrogen loss in black soils in Northeast China. Journal of Agro-Environment Science, 35（9）: 1816-1823. doi: 10.11654/jaes.2016-0412. (in Chinese with English abstract)
	71- Han, W.J., Wang, Y., Chen, H.X., et al., 2016. Study on the effect of new-type fertilizer application on spring maize production and its environmental impact in black soil area. Journal of Soil and Water Conservation. doi: 10.13870 / j. cnki. stbcxb. 2016.02.053. (in Chinese with English abstract)
	72- Song, Z., Li, H., Li, J., et al., 2018. Effect of controlled-release fertilizer on the yield and soil ammonia volatilization of spring maize in northeast China. Journal of Agro-Environment Science, 37(10):2342-2349. doi: 10.11654/jaes.2017-1762. (in Chinese with English abstract)
	73- Li, Y., Ke, J., Jin, Y.W., et al., 2015. Ammonia volatilization characteristics of different kinds of high-nitrogen compound fertilizers and their effects on nitrogen balance. Journal of Plant Nutrition and Fertilizer, doi: 10. 11674/zwyf. 2015.0308. (in Chinese with English abstract)
	74- Wang, L., Liu, Z., Wang, J., 2009. Volatilization law of nitrogen and phosphorus combined with ammonia in maize farmland ecosystem in black soil. Journal of Northeast Forestry University, 37(7):87-90. (in Chinese with English abstract)
	75- Ji,Y., Sun, J., Zhou, W., Liang, G., He, P., Ma, X., Wei, D., Wu, Y., 2009. Study on ammonia volatilization characteristics of black soil maize monoculture system in Northeast China. Journal of Plant Nutrition and Fertilizer Science, 15 (05): 1044 -1050. doi: 10.3321/j.issn:1008-505X.2009.05.009. (in Chinese with English abstract)
	76- Peng, X., Wang, H., Liu, X., et al., 2015. Study on distribution of N and ammonia volatilization of urea within short time after fertilization in paddy soil. Journal of Northeast Agricultural University, 46(12): 24-32. doi: 10.19720/j.cnki.issn.1005-9369.2015.12.004. (in Chinese with English abstract).
	77- Wei, Z., Hong, Y.W., Jia, Y.U., et al., 2010. Effects of manure and chemical fertilizers application on nitrogen cycling and balance in agricultural ecosystem of black soil. Journal of Soil and Water Conservation, 2010. (in Chinese with English abstract)
	78- Han, X., Wang, S., Song, C., et al., 2003. Fate of fertilizer nitrogen in paddy field of black soil region. The journal of applied ecology, 14(11):1859-1862. doi: 10.13287/j.1001 -9332.2003.0411. (in Chinese with English abstract)
	79- Ba, C., Yang, M., Zou, H., et al., 2018. Combined effects of coating/inhibitors on N2O emission and ammonia volatilization in farmland soil. Journal of Agro-Environment Science, 37（6）：1291-1299. doi: 10.11654/jaes.2017-1538. (in Chinese with English abstract).
	80- Sun, X., Li, D., Wu, Z., Cui, Y., Han, M., Li, Y., Yang, D., Cui, Y., 2016. Characteristics of ammonia volatilization and nitrous oxide emission from a paddy soil under continuous application of different slow/controlled release urea．doi: 10．13287/j．1001－9332．201606．039. (in Chinese with English abstract)
	81- Wang, A., Ma, X., Yu, Y., Xu, J., Lyu, W., 2018. Ammonia volatilization from rice-crab culture systems in northern China. ActaAgriculturaeZhejiangensis， 30(4): 622 －631. doi: 10.3969/j.issn.1004-1524.2018. 04. 14. (in Chinese with English abstract)
	82- Cheng, X., Liu, X., Meng, J., et al., 2016. Effects of biochar on NH3 volatilization，N2O emission and nitrogen fertilizer use efficiency in brown soil. Journal of Agro-Environment Science, 35（4）:801-807. doi: 10.11654/jaes.2016.04.026. (in Chinese with English abstract)
	83- Yi, F.J., Chuang, B.A., Dan, L.W., et al., 2019. Effect of mixed polymer-coated urea reduction on soil NH3 volatilization and N2O emission. Research of Environmental Sciences. doi: 10. 13198j. issn. 1001-6929. 2018. 07. 10. (in Chinese with English abstract)
	84- Yang, X., Yang, H., 2016. Soil ammonia volatilization under the different fertilization in summer corn farmland in North China. Journal of Arid Land Resources and Environment. doi:10. 13448/j. cnki. Jalre. 2016. 361. (in Chinese with English abstract)
	85- Yang, X., Yang, H., 2017. The ammonia volatilization of anthropogenic-alluvial soil in summer maize farmland under different fertilization methods in Gansu Province. Agricultural Research in the Arid Areas., doi: 10.7606/j.issn.1000-7601.2017.05.12. (in Chinese with English abstract)
	86- Fu, X.W., Liu, W., Xu, W.X., et al., 2018. Response of soil ammonia volatilization to nitrogen fertilizer in winter wheat-summer soybean rotation system in Ili River Valley. Journal of Xinjiang Agricultural University, 41(02):79-85. (in Chinese with English abstract)
	87- Wen, Wei.G., Wei, H., Hong, T.J., et al., 2009. Preliminary study on the impact of nitrogen fertilizer application at the growth stage on ammonia volatilization of maize-soil system. Journal of Maize Sciences, doi: 10.13597/j.cnki.maize.science.2009.04.032. (in Chinese with English abstract)
	88- Xu, W.L., Liu, H., Zhang, Y.S., Wang, X.H., Qin, Q., Liao, Z.W., 2009. In-situ monitoring of soil ammonia volatilization with different fertilizer ratios in gray desert soil area. Ecological Journal, 29(8): 4565-4571. (in Chinese with English abstract)
	89- Shi, Z.S., Xu, Y.B., Lei, B.K., Liu, H.B., 2014. Ammonia Volatilization under Different Nitrogen Application Rates in Paddy Soil in the Northern Hai Lake Area [J]. Chinese Journal of Soil Science, 45(03): 672-678. (in Chinese with English abstract)
	90- Xue, X.X., Wu, X.P., Zhang, Y.F., Luo, X.H., Zou, B.X., Wang, D.P., Wang, W.B., 2018. Effects of controlled urea loss on ammonia volatilization, nitrogen transport and utilization efficiency in paddy fields [J]. Journal of applied ecology, 29(01): 133-140. doi: 10．13287/j．1001－9332．201801．023. (in Chinese with English abstract)
	91- Wang, Z.G., Liu, P., Shao, Y.T., Tang, Y.L., Guan, A.M., Wang, J.W., 2018. The effect of reducing nitrogen and intercropping on nitrogen balance in sweet corn in South China [J]. Chinese Journal of Applied Ecology, 26 (11):1643-1652. doi: 10.13930/j.cnki.cjea.180121. (in Chinese with English abstract)
	92- Xiao, J., Fan, J. L., Ye, G.P., Liu, D.Y., Yan, J.L., David, J., Ding, W.X., 2016. Study on soil ammonia volatilization loss and its influencing factors under different fertilization [J]. Journal of agricultural environmental science, 35(10): 2011-2018. doi:10.11654/jaes.2016-0263. (in Chinese with English abstract)
	93- Li, Z.X., Wang, Q.C., Liu, K.C., Dong, S.T., Wang, F.F., Zhang, J.W., Liu, C.X., 2009. Soil ammonia volatilization of summer maize under different fertilization patterns [J]. Actaecologicasinica, 29(01): 307-314. (in Chinese with English abstract)
	94- Yang, N., Liao, W.H., Gao, Z.L., Wang, S., Zhang, J.R., Zhao, Y.J., 2018. Biomass, crude protein production potential and ammonia emission in different dietary rotation patterns [J]. Journal of soil and water conservation, 2008,32 (02): 312-320. doi：10.13870/j.cnki.stcxb.2018.02.046.(in Chinese with English abstract)
	95- Lin, L., Hu. K.L., Li, G.D., Wang, H.Y., 2011. Analysis of nitrogen loss pathways in maize season under different fertilization modes in high-yielding grain areas [J]. Environmental science, 32(09): 2617-2624. (in Chinese with English abstract)
	96- Zhou, L.P., Yang, L.P., Bai, Y.L., Lu, Y.Y., Wang, L., Ni, L., 2016. Effects of slow release nitrogen treatment on ammonia volatilization and nitrogen utilization in summer maize field [J]. Journal of plant nutrition and fertilizer 22(06): 1449-1457. doi: 10.11674/zwyf.16039. (in Chinese with English abstract)
	97- Ji, Y.Z., Ju, X.T., Liu, X.Y., Zhang, L.J., Li, X., Liu, N., 2010. Effects of different nitrogen application rates on nitrogen distribution and gas loss in winter wheat fields [J]. Journal of soil and water conservation, 24(03): 113-118. (in Chinese with English abstract)
	98- Wang, L., Dong, S.T., Liu, P., Zhang, J.W., Zhao, B., Zheng, F.X., 2012. Effects of water and nitrogen interaction on ammonia volatilization loss and yield in winter wheat fields [J]. Chinese Journal of Applied Ecology, 29(06): 1919-1927. doi: 10．13287/j．1001－9332．201806．026. (in Chinese with English abstract)
	99- Yang, Q.L., Liu, P., Dong, S.T., Zhang, J.W., Zhao, B., Li, R.F., Ren, H., Ren, H., Han, X.F., 2018. Effects of organic and inorganic fertilizer application on nitrogen gas loss and grain yield of summer maize [J]. Chinese journal of agricultural sciences, 51(13): 2476-2488. doi: 10.3864/j.issn.0578-1752.2018.13.004. (in Chinese with English abstract)
	100- Zheng, F.X., Dong, S.T., Liu, P., Zhang, J.W., Zhao, B., 2017. Effects of long-term organic and inorganic fertilizer application on grain yield and ammonia volatilization loss of winter wheat [J]. Journal of plant nutrition and fertilizer, 23(03): 567-577. doi: 10.11674/zwyf.16426. (in Chinese with English abstract)
	101- Shan, N., Zhao, T.K., Bi, X.Q., An, Z.Z., Zhao, L.P., Du, L.F., 2014. Study on ammonia volatilization in wheat fields under different nitrogen application levels [J]. Journal of Agricultural Environmental Science, 33 (09): 1858 -1865. doi:10.11654/jaes.2014.09.026. (in Chinese with English abstract)
	102- Shan, N., Bi, X.Q., Du, L.F., An, Z.F., Zhao, L.P., Zhao, T.K., 2013. Effect of nitrogen fertilizer on ammonia volatilization loss before winter in wheat field [J]. China soil and Fertilizer, (06): 47-51. doi: 10. 11838/sfsc. 20130610. (in Chinese with English abstract)
	103- Xiao, J., Fan, J.L., Ye, G.P., Liu, D.Y., Yan, J., Luo, J.F., HOULBROOKE David J, Ding, W.X., 2016. Study on ammonia volatilization loss and its influencing factors in wheat seasonal tidal soil under different fertilizer treatments [J]. Journal of Agricultural Environmental Science, 35 (10): 2011 -2018. doi:10.11654/jaes.2016-0263. (in Chinese with English abstract)
	104- Ma, Y.l., Ji, Y.Z., Li, X., Zhang, L., Ju, X.T., Zhang, L.J., 2012. Effect of nitrogen application level on ammonia volatilization and nitrous oxide emission in wheat-corn rotation system [J]. Journal of Ecological Environment, 21 (02): 225 - 230. doi:10.16258/j.cnki.1674-5906.2012.02.019. (in Chinese with English abstract)
	105- Wang, X.B., Zhou, W., Liang, G.Q., Pei, X.X., Xia, W.J., Sun, J.W., 2009. Soil ammonia volatilization of winter wheat-summer corn rotation system in North China under optimized fertilizer conditions [J]. Journal of Plant Nutrition and Fertilizer, 15 (02): 344-351. (in Chinese with English abstract)
	106- Lu, Y.Y., Song, F.P., Zhao, J., Gao, Y., 2010. Effects of controlled release urea on soil ammonia volatilization, inorganic nitrogen content and nitrogen use efficiency of corn [J]. Journal of soil and Water Conservation, 24 (06): 79 - 82. (in Chinese with English abstract)
	107- Liu, M., Zhang, C., He, Y.F., Gao, B., Su, F., Jiang, R.F., Ju, X.T.. 2016. Effects of nitrogen topdressing on N2O and NH3 emissions from summer corn soil [J]. Journal of Plant Nutrition and Fertilizer, 22 (01): 19-29. doi: 10. 11674/zwyf． 15108. (in Chinese with English abstract)
	108- Zhao, B., Dong, S.T., Wang, K. J., Zhang, J.W., Liu, P., 2009. Effects of controlled release fertilizer on yield, ammonia volatilization and nitrogen use efficiency of summer corn [J]. Journal of Applied Ecology, 20 (11): 2678 -2684. doi :10. 13287/ j. 1001 9332. 2009. 0403. (in Chinese with English abstract)
	109- Zou, J., Hu, X.Y., Zhang, Y.Y., Chen, Y.J., Wang, Q., Liu, Y., 2008. Effect of biochar on soil ammonia volatilization under different surface conditions [J]. Environmental science, 39(01): 348-354. doi: 10． 13227/j．hjkx． 201706171. (in Chinese with English abstract)
	110- Xie, Y., Rong, X.M., Zhang, Y.P., He, X., Shi, D.J., Liu, Q., 2016. Effects of reduced nitrogen fertilizer application on N2O emission and ammonia volatilization in spring maize soil [J]. Journal of agricultural environmental science, 35(03): 596-603. doi:10.11654/jaes.2016.03.025. (in Chinese with English abstract)
	111- Tian, C., Zhou, X., Xie, G.X., Liu, Q., Rong, X.M., Zhang, Y.P, .Tan, L.Z., Peng, J.W., 2018. Effects of controlled release urea on ammonia volatilization loss and nitrogen fertilizer utilization rate in double cropping rice fields [J]. China rice science, 32(04): 387-397. doi: 10.16819/j.1001-7216.2018.8004. (in Chinese with English abstract)
	112- Liu, W., Zhou, J.X., Xie, Y.Y., Xue , X.X., Xiong, H.F., Xu, F.S., Yuan, J.F., Xiong, Y.S., 2019. Effect of controlled release urea strip application depth on ammonia volatilization and nitrogen fertilizer efficiency in fresh corn field [J]. Journal of Applied Ecology, 30(04): 1295 - 1302. doi: 10．13287/j．1001－9332．201904．004. (in Chinese with English abstract)
	113- Zhu, J., Peng, H., Li, X.J., Cai, J.P., Ji, X.H., 2017. The application of quicklime increased the loss of nitrogen and ammonia volatilization in acid double cropping paddy field [J]. Hunan Agricultural Science, (07): 32 -36. doi:10.16498/j.cnki.hnnykx.2017.007.010. (in Chinese with English abstract)
	114- Li, S.H., Liu, T.C., Ma, Y.H., Li, C.F., 2018. Effects of Tillage methods and nitrogen types on ammonia volatilization, nitrogen use efficiency and Rice yield in Paddy Field [J]. Journal of Agricultural Resources and Environment, 35(05): 447-454. doi:10.13254/j.jare.2018.0015. (in Chinese with English abstract)
	115- Yan, W., Liu, Q., Zhang, Y.P., Gong, R., Wang, X.X., Liu, L.F., 2014. Soil ammonia volatilization characteristics of controlled release urea in summer corn [J]. Guizhou Agricultural Science, 42 (04): 136- 140. (in Chinese with English abstract)
	116- Lin, C.W., Luo, F.X., Zhu, B., Huang, J.J., Zhu, Y.Q., Pang, L.Y., Zhang, H., 2015. Ammonia volatilization flux and its influencing factors in paddy field of Sichuan Basin [J]. Journal of Southwest Agriculture, 28(01): 226 -231.doi:10． 16213/j．cnki．scjas． 2015． 01． 044. (in Chinese with English abstract)
	117- Li, X.X., Yang, J., Wang, C.Q., Bai, G., Yi, L., Yi Yun., L, Huang., F, Li., B, Zeng., P.Y., 2015. Effects of the application of pig manure on the characteristics of the ammonia volatilization in the rice season in Chengdu Plain[J]. Journal of Agricultural Environmental Sciences, 34(11): 2236-2244. doi:10.11654/jaes.2015.11.028. (in Chinese with English abstract)
	118- Zhang, C., Han, X.Y., Li, X.Q., Huang, B.X., Zhu, B., Su, F., Ju, X.T., 2015. Study on ammonia volatilization of winter wheat / summer corn rotation in purple soil in hilly region of central Sichuan [J]. Chinese Journal of Ecological Agriculture, 23 (11): 1359 - 1366. doi: 10.13930/j.cnki.cjea.150683. (in Chinese with English abstract)
	119- Qiao, Y., Zhu, J., Wu, Q., et al. (2021). Nitrogen Loss from Surface Runoff and Ammonia Volatilization from Paddy Field as Impacted by Different Fertilizers and Planting Methods [J]. Journal of Irrigation and Drainage, 40(2): 32-41. (in Chinese with English abstract)
	120- Li, H., Zhao, T., Sun, Z., et al. (2021). Effects of Different Nitrogen Fertilizer Application on Winter Wheat Yield and Soil Ammonia Volatilization in Fluvio- Aquic Soil Region[J]. Shandong Agricultural Sciences, 2021, 52(11): 51-55.
	121- An Bowen, Sun Yanxin, li Zhantai, et al. Effects of different slow/controlled release fertilizers on yield, quality of fresh maize and ammonia emissions [J]. Chinese Journal of Applied Ecology, 2020, 31(07): 2422-2430.
	122- Li Ran, Cai Weiwei, Ai Tiancheng, et al. Responses of ammonia volatilization and grain yield under different water and fertilizer practices in a rice paddy[J]. Soil and Fertilizer Sciences in China, 2020. (03): 47-54.
	123- Shan Nan, Zhao Tongke, Du Lianfeng, et al. Ammonia volatilization from maize cropland under different N applications at a rural area of central Northern China Plain[J]. Soil and Fertilizer Sciences in China, 2020. (04): 32-40.
	124- Meng yao, Wang Weihua, Pang Ruyue, et al. Effects of water, fertilizer and straw co-management on soil ammonia volatilization and crop yield in wheat-maize rotation system [J]. Shandong Agricultural Sciences, 2021. : 1-13.
	125- Hg
	126- Ding, Y., 2015.Characteristics of N leaching and apparent N budget in cultivated land under a winter wheat-summer maize rotation system in Guan Zhong Plain. Master dissertation, Northwest Agriculture and Forestry University, Yangling, Shanxi (in Chinese with English abstract)
	127- Yin, X.F., 2010. Characteristics of nitrogen fertilizer utilization and nitrate-N leaching in the Guanzhong area. Master dissertation, Northwest Agriculture and Forestry University, Yangling, Shaanxi (in Chinese with English abstract)
	128- Yang, X.L., Lu, Y.L., Tong, Y.A., Lin, W., Liang, T., 2013. Effects of application of nitrogen fertilizer and incorporation of straw on nitrate leaching in farmland under wheat maize rotation system. Acta. Pedol. Sin. 50, 564–573 (in Chinese with English abstract)
	129- Huang, M., Liang, T., Ouyang, Z., Wang, L., Zhang, C., Zhou, C., 2011. Leaching losses of nitrate nitrogen and dissolved organic nitrogen from a yearly two crops system, wheat-maize, under monsoon situations. Nutrient Cycling in Agro-ecosystems. 91(1), 77-89. DOI 10.1007/s10705-011-9447-z.
	130- Huang, T., Ju, X., Yang, H., 2017. Nitrate leaching in a winter wheat-summer maize rotation on a calcareous soil as affected by nitrogen and straw management. Scientific Reports. 7, 42247. DOI: 10.1038/srep42247.
	131- Li, X., Hu, C., Delgado J.A., Zhang, Y., Ouyang, Z. (2007). Increased nitrogen use efficiencies as a key mitigation alternative to reduce nitrate leaching in north china plain. , 89(1-2), 0–147. doi:10.1016/j.agwat.2006.12.012.
	132- Jia, D., Dai, X., Xie, Y., & He, M. (2021). Alternate furrow irrigation improves grain yield and nitrogen use efficiency in winter wheat. Agricultural Water Management, 244, 106606. doi:10.1016/j.agwat.2020.106606.
	133- Ju, X.-T.; Xing, G.-X.; Chen, X.-P.; Zhang, S.-L.; Zhang, L.-J.; Liu, X.-J.; Cui, Z.-L.; Yin, B.; Christie, P.; Zhu, Z.-L.; Zhang, F.-S. (2009). Reducing environmental risk by improving N management in intensive Chinese agricultural systems. Proceedings of the National Academy of Sciences, 106(9), 3041–3046. doi:10.1073/pnas.0813417106 .
	134- Fang, Q.X., Yu, Q., Wang, E.L., Chen, Y.H., Zhang, G.L., Wang, J., Li, L.H., 2006. Soil nitrate accumulation, leaching and crop nitrogen use as influenced by fertilization and irrigation in an intensive wheat–maize double cropping system in the North China Plain. Plant Soil 284, 335–350. DOI 10.1007/s11104-006-0055-7.
	135- Liang, X.Q., Xu, L., Li, H., He, M.M., Qian, Y.C., Liu, J., Nie, Z.Y., Ye, Y.S., Chen, Y.X., 2011. Influence of N fertilization rates, rainfall, and temperature on nitrate leaching from a rainfed winter wheat field in Taihu watershed. Phys. Chem. Earth 2002 (36), 395–400. https://doi.org/10.1016/j.pce.2010.03.017.
	136- Jia X C, Shao L J, Liu P, Zhao B Q, Gu L M, Dong S T, Bing S H, Zhang J W, Zhao B. 2014. Effect of different nitrogen and irrigation treatments on yield and nitrate leaching of summer maize (Zea mays L.) under lysimeter conditions. Agricultural Water Management, 137, 92–103.
	137- Lin, L., 2011. Evaluation of nitrogen loss way, water and nitrogen use efficiencies in winter wheat and summer mazie rotation system under different fertilizer N managements-A case study in Huantai County. Master dissertation, Shandong Agricultural University, Taian, Shandong (in Chinese with English abstract)
	138- Li, Y.T., Li, X.Y., Zhao, B.Q., Wang, L.X., Li, X.P., 2008. Effect of controlled-release compounded fertilizers on maize yields and leaching less of nitrate in soil profile. Soils. Fertil Sci. Chin. 26, 45–48 (in Chinese with English abstract)
	139- Dai, J., Wang, Z., Li, M., He, G., Li, Q., Cao, H., Wang, S., Gao, Y., Hui, X. (2016). Winter wheat grain yield and summer nitrate leaching: Long-term effects of nitrogen and phosphorus rates on the Loess Plateau of China. Field Crops Research, 196(0), 180–190. doi:10.1016/j.fcr.2016.06.020.
	140- He, Tiehu; Liu, Deyan; Yuan, Junji; Ni, Kang; Zaman, Mohammad; Luo, Jiafa; Lindsey, Stuart; Ding, Weixin (2018). A two years study on the combined effects of biochar and inhibitors on ammonia volatilization in an intensively managed rice field. Agriculture, Ecosystems & Environment, 264(), 44–53. doi:10.1016/j.agee.2018.05.010 .
	141- Yang, Guoying; Ji, Hongting; Sheng, Jing; Zhang, Yuefang; Feng, Yanfang; Guo, Zhi; Chen, Liugen (2020). Combining Azolla and urease inhibitor to reduce ammonia volatilization and increase nitrogen use efficiency and grain yield of rice. Science of The Total Environment, 743(), 140799–. doi:10.1016/j.scitotenv.2020.140799 .
	142- Cao, Y., Tian, Y., Yin, B., & Zhu, Z. (2014). Improving agronomic practices to reduce nitrate leaching from the rice–wheat rotation system. Agriculture, Ecosystems & Environment, 195, 61–67. doi:10.1016/j.agee.2014.05.020.
	143- Zhao, X., Xie, Y., Xiong, Z., Yan, X., Xing, G., & Zhu, Z. (2009). Nitrogen fate and environmental consequence in paddy soil under rice-wheat rotation in the Taihu lake region, China. Plant and Soil, 319(1-2), 225–234. doi:10.1007/s11104-008-9865-0.
	144- Cui, Y., Cheng, X., Han, C., Li, R., 1998. Rice nitrogen utilization efficiency and nitrogen leaching amount in taihu lake watershed of south Jiangsu province. Journal of China Agricultural University (in Chinese with English abstract)
	145- Xue, L. H., Yu, Y. L., Yang, L. Z., 2011. Nitrogen balance and environmental impact of paddy field under different n management methods in taihu lake region. Environmental Science. 32(4), 1133-1138 (in Chinese with English abstract)
	146- Luo, X.S., Kou, C.L., Wang, X.F, Li, T.K, Wang, H.Y., Effects of nitrogen application on nitrogen and phosphorus leaching in fluvo-aquic soil on a winter wheat-summer maize rotation farmland[J]. Chinese Journal of Eco-Agriculture, 2021, 29(1): 29-37. (in Chinese with English abstract)
	147- Li, Z. , Shi H. b., Li X. Y., Zhang, Z. W., Response of the Nitrogen Nitrogen Leaching Law to Different Water-nitrogen Management patterns in Farmland[J]. Journal of Soil and Water Conservation, 31(01), 310-317. (in Chinese with English abstract)
	148- Wu, S. D., Dong, Q., Dang T. H., Effects of Reduced Nitrogen Application and Deep Burial of Straw on Soil Electrical Conductivity and Nitrate Nitrogen leaching in Spring Maize Field [J]. Journal of Soil and Water Conservation, 2018, 32(06), 46-51. (in Chinese with English abstract)
	149- Wang, A., Dai, D.C., Ma, X.Z., et al.Effects of rice-crab culture on nitrogen leaching in rice fields in the north of China[J]. Journal of Zhejiang University (Agric. & Life Sci.), 2019, 45(3):332-342. (in Chinese with English abstract)
	150- Luo, J.H.，Wang, H.T., Zhao, Y., et al.Preliminary Study on Nitrogen Loss and Dynamic Change of Farmland under Different Water and Nitrogen Measures[J]. Xinjiang Agricultural Sciences. 57 (12), 2205-2212. (in Chinese with English abstract)
	151- Zhang, M., Yao, Y.L., Zeng, K., et al. Study on Mechanism of Reducing Nitrate Leaching with Organic Addition from Paddy Field in Taihu Lake Region [J]. Soils, 52(04), 766-772. (in Chinese with English abstract)
	152- Xiao, Q., Li, L.X., Li, H.Y.,et al. Effects of Modified Urea Topdessing on Nitrogen Volatilization and Leaching in Winter Wheat and Summer Maize[J]. Journal of Soil and Water Conservation, 34(04), 270-279. (in Chinese with English abstract)
	153- Chen, Z.W., Ying, S.S., Liu, Y.X., et al. Effects of Different Fertilizer Types on Nitrogen Loss in Paddy Field [J]. Journal of Soil and Water Conservation, 35(01): 36-43. (in Chinese with English abstract)
	154- Zhang, M., Tian, Y., Zhao, M., Yin, B., Zhu, Z. 2003. The assessment of nitrate leaching in a rice-wheat rotation system using an improved agronomic practice aimed to increase rice crop yields. Agriculture, Ecosystems & Environment, 241:100-109. https://doi.org/10.1016/j.agee.2017.03.002.
	155- Peng, S., Yang, S., Xu, J., Luo, Y., Hou, H. Nitrogen and phosphorus leaching losses from paddy fields with different water and nitrogen managements Paddy Water Environ., 9 (2011): 333-342.
	156- Xue, L., Yu, Y., Yang, L. Maintaining yields and reducing nitrogen loss in rice–wheat rotation system in Taihu Lake region with proper fertilizer management. Environ. Res. Lett., 9 (2014): 115010.
	157- Liu, X. J., Ju, X. T., Zhang, F. S., Pan, J. R., and Christie, P.: Nitrogen dynamics and budgets in a winter wheat–maize cropping system in the North China Plain, Field Crops Research, 83, 111-124, 2003.
	158- Wei, S. Q.: Effects of different nutrient management on nitrogen leaching loss from purple soil. (In Chinese), 2010.Master thesis, Southwest Agricultural University, 2010.
	159- Yao, L.: Study on the fate of nitrogen in different nutrient management in mustard/maize tuber rotation system. (In Chinese), 2012.Master thesis, Southwest Agricultural University, 2012.
	160- Zhao, R. F.: The sustainability evaluation of the optimized management of water and nitrogen resources for winter wheat-summer maize rotation system (In Chinese), 2006.PhD thesis, China Agricultural University, 2006
	161- Zhang, Y. M., Zhang, J. B., Hu, C. S., Li, X. X., and Zhu, A. n.: Nitrate leaching in wheat-maize rotation field in the North China Plain. (In Chinese), Acta Pedologica Sinica, 2006. 17-25, 2006.
	162- Zhu, B., Wang, T., Kuang, F., Luo, Z., Tang, J., and Xu, T.: Measurements of nitrate leaching from a hillslope cropland in the Central Sichuan Basin, China, Soil Science Society of America Journal, 73, 1419-1426, 2009.
	163- Su, M. S.: Effects of sprinkler uniformity on leaching of water and nitrate and crops growth. (In Chinese), 2005.Master thesis, China Agricultural University, 2005.
	164- Wang, X. B.: Nitrogen cycling and balance in winter wheat-summer corn rotation system under optimized nitrogen management. (In Chinese), 2009.PhD thesis, Chinese Academy of Agricultural Sciences, 2009.
	165- Ni, K., Ding, W., Zaman, M., Cai, Z., Wang, Y., Zhang, X., and Zhou, B.: Nitrous oxide emissions from a rainfed-cultivated black soil in Northeast China: effect of fertilization and maize crop, Biology and Fertility of Soils, 48, 973-979, 2012.
	166- Liu, Y., Li, Y., Wan, Y., Chen, D., Gao, Q., Li, Y., and Qin, X.: Nitrous oxide emissions from irrigated and fertilized spring maize in semi-arid northern China, Agriculture, Ecosystems & Environment, 141, 287-295, 2011b.
	167- Liu, Y. T., Li, Y. E., Wan, Y. F., Gao, Q. Z., Qin, X. B., and Chen, D. L.: Nitrous oxide emissions from spring-maize field under the application of different nitrogen and phosphorus fertilizers. (In Chinese), Journal of Agro-Environment Science, 2011c. 1468-1475, 2011c.
	168- Liu, C. Y., Wang, K., Meng, S. X., Zheng, X. H., Zhou, Z. X., Han, S. H., Chen, D. L., and Yang, Z. P.: Effects of irrigation, fertilization and crop straw management on nitrous oxide and nitric oxide emissions from a wheat–maize rotation field in northern China, Agriculture, Ecosystems & Environment, 140, 226-233, 2011a.
	169- Ding, W. X., Yu, H. Y., and Cai, Z. C.: Impact of urease and nitrification inhibitors on nitrous oxide emissions from fluvo-aquic soil in the North China Plain, Biology and Fertility of Soils, 47, 91-99, 2011.
	170- Ding, H., Wang, Y. S., and Li, W. H.: Denitrification losses and N2O emission from different nitrogen fertilizers applied to maize-fluvo-aquic soil system. (In Chinese), Scientia Agricultura Sinica, 2004. 1886-1891, 2004.
	171- Gao, Z. L.: N2O flux and CH4 uptake of soil in winter wheat and summer maize rotation system. (In Chinese), 2004.PhD thesis, China Agricultural University, 2004.
	172- Hu, X. K.: Greenhouse gases fluxes on winter wheat-summer maize rotation and mitigation strategies on the North China Plain. (In Chinese), 2011.PhD thesis, China Agricultural University, 2011.
	173- Li, X.: Fate of fertilizer nitrogen and gaseous N loss in winter wheat-summer maize rotation system in North China Plain. (In Chinese), 2007.PhD thesis, Hebei Agricultural University, 2007.
	174- Wang, X. B.: Nitrogen cycling and balance in winter wheat-summer corn rotation system under optimized nitrogen management. (In Chinese), 2009.PhD thesis, Chinese Academy of Agricultural Sciences, 2009.
	175- Gao, B.: Greenhouse gases emissions and net global warming potential of different cropping systems and management practices on the North China Plain (In Chinese), 2012.PhD thesis, China Agricultural University, 2012.
	176- Hu, X. k., Huang, B. X., Su, F., Ju, X. T., Jiang, R. F., and Zhang, F. S.: Effects of nitrogen management on methane and nitrous oxide emissions from summer maize soil in North China Plain. (In Chinese), Scientia Sinica China, 41, 117-128, 2011.
	177- Chen Z, Ding W, Luo Y, Yu H, Xu Y, Müller C, Xu X., Zhu T. 2014. Nitrous oxide emissions from cultivated black soil: A case study in Northeast China and global estimates using empirical model, Glob Biogeochem Cycle. 27: 1311–1326.
	178- Chen Z, Ding W, Xu Y, Müller C, Yu H, Fan J. 2016. Increased N2O emissions during soil drying after waterlogging and spring thaw in a record wet year, Soil Biol Biochem. 101: 152–164.
	179- Shang Q, Yang X, Gao C, Wu P, Liu J, Xu Y, Guo S. 2011. Net annual global warming potential and greenhouse gas intensity in Chinese double rice-cropping systems: a 3-year field measurement in long-term fertilizer experiments. Glob Change Biol. 17: 2196‒2210.
	180- Zhai L M, Liu H B, Zhang J Z, Huang J, Wang B R. 2011. Long-term application of organic manure and mineral fertilizer on N2O and CO2 emissions in a red soil from cultivated maize-wheat rotation in China. Agric Sci China 10: 1748‒1757.
	181- Zhang D, Pan G, Wu G, Kibue G W, Li L, Zhang X, Liu X. 2016. Biochar helps enhance maize productivity and reduce greenhouse gas emissions under balanced fertilization in a rainfed low fertility inceptisol. Chemosphere. 142: 106‒113.
	182- Liu C, Wang K, Zheng X. 2012a. Responses of N2O and CH4 fluxes to fertilizer nitrogen addition rates in an irrigated wheat-maize cropping system in northern China. Biogeosciences. 9: 839‒850.
	183- Zhang A, Cui L, Pan G, Li L, Hussain Q, Zhang X, Crowley D. 2010. Effect of biochar amendment on yield and methane and nitrous oxide emissions from a rice paddy from Tai Lake plain, China. Agric Ecosyst Environ. 139: 469‒475.
	184- Liu S, Zhang L, Liu Q, Zou J. 2012b. Fe(III) fertilization mitigating net global warming potential and greenhouse gas intensity in paddy rice-wheat rotation systems in China. Environ Pollut. 164: 73‒80.
	185- Wang J, Zhang X, Liu Y, Pan X, Liu P, Chen Z, Xiong Z. 2012. Modeling impacts of alternative practices on net global warming potential and greenhouse gas intensity from rice-wheat annual rotation in China. PLoS One. 7: 45‒68.
	186- Ma E, Zhang G, Ma J, Xu H, Cai Z, Yagi K. 2010. Effects of rice straw returning methods on N2O emission during wheat-growing season. Nutr Cycl Agroecosyst. 88: 463‒469.
	187- Jiang J, Hu Z, Sun W, Huang Y. 2010. Nitrous oxide emissions from Chinese cropland fertilized with a range of slow-release nitrogen compounds. Agric Ecosyst Environ. 135: 216‒225.
	188- Wang J, Chen Z, Ma Y, Sun L, Xiong Z, Huang Q, Sheng Q. 2013. Methane and nitrous oxide emissions as affected by organic–inorganic mixed fertilizer from a rice paddy in southeast China. J Soils Sed. 13: 1408‒1417.
	189- Zhou, M., Bo Z, Klaus B, Wang X, Zheng X. 2014. Nitrous oxide emissions during the non-rice growing seasons of two subtropical rice-based rotation systems in southwest China. Plant Soil 383: 401–414.
	190- Ding W, Cai Y, Cai Z, Yagi K, Zheng X. 2007. Nitrous oxide emissions from an intensively cultivated maize-wheat rotation soil in the North China Plain. Sci Total Environ. 373: 501‒511.
	191- Liu X, Ye Y, Liu Y, Zhang A, Zhang X, Li L, Zheng J. 2014. Sustainable biochar effects for low carbon crop production: A 5-crop season field experiment on a low fertility soil from Central China. Agric. Sys. 129: 22‒29.
	192- Ding W X, Chen Z M, Yu H Y, Luo J F, Yoo G Y, Xian J, Zhang H J, Yuan J J. 2015. Nitrous oxide emission and nitrogen use efficiency in response to nitrophosphate, N-(n-butyl) thiophosphoric triamide and dicyandiamide of a wheat cultivated soil under sub-humid monsoon conditions. Biogeosciences. 12: 803–815.
	193- Niu Y, Chen Z, Müller C, Zaman M M, Kim D, Yu H, Ding W. 2017. Yield-scaled N2O emissions were effectively reduced by biochar amendment of sandy loam soil under maize-wheat rotation in the north China plain. Atmos Environ. 170: 58‒70.
	194- Wang J Y, Jia J X, Xiong Z Q, Khalil M A K, Xing G X. 2011. Water regime–nitrogen fertilizer–straw incorporation interaction: Field study on nitrous oxide emissions from a rice agroecosystem in Nanjing, China. Agric Ecosyst Environ. 141: 437–446.
	195- Cai Z, Xing G, Yan X, Xu H, Tsuruta H, Yagi K, Minami K. 1997. Methane and nitrous oxide emissions from rice paddy fields as affected by nitrogen fertilizers and water management. Plant Soil 196: 7–14.
	196- Cao J, Ren L, Yang B, Xu H, Xing G. 1999. Characteristics of N2O emission from rice fields in the hilly area of southern Jiangsu province. Chin J Ecol. 18: 6–9 (in Chinese).
	197- Zou J, Huang Y, Lu Y, Zheng X, Wang Y. 2005. Direct emission factor for N2O from rice–winter wheat rotation systems in southeast China. Atmos Environ. 39: 4755‒4765.
	198- Ji Y, Liu G, Ma J, Zhang G, Xu H, Yagi K. 2013. Effect of controlled-release fertilizer on mitigation of N2O emission from paddy field in South China: a multi-year field observation. Plant Soil 371: 473–486.
	199- Tang H, Xiao X, Tang W, Wang K, Sun J, Li W, Yang G. 2015. Effects of winter covering crop residue incorporation on CH4 and N2O emission from double-cropped paddy fields in southern China. Environ. Sci Poll Res. 22: 12689–12698.
	200- Yao Z, Zheng X, Wang R, Liu C, Lin S, Butterbach-Bahl K. 2019. Benefits of integrated nutrient management on N2O and NO mitigations in water-saving ground cover rice production systems. Sci Total Environ. 646: 1155–1163.
	201- Yao Z, Zheng X, Wang R, Liu C, Lin S, Butterbach-Bahl K. 2019. Benefits of integrated nutrient management on N2O and NO mitigations in water-saving ground cover rice production systems. Sci Total Environ. 646: 1155–1163.
	202- Gao, X., Deng, O., Ling, J. et al. Effects of controlled-release fertilizer on nitrous oxide and nitric oxide emissions during wheat-growing season: field and pot experiments. Paddy Water Environ 16, 99–108 (2018). https://doi.org/10.1007/s10333-017-0619-6.
	203- Xiang, J., Liu, D., Ding, W., Yuan, J., & Lin, Y. (2015). Effects of biochar on nitrous oxide and nitric oxide emissions from paddy field during the wheat growth season. Journal of Cleaner Production, 104, 52–58. doi:10.1016/j.jclepro.2014.12.038.
	204- Liu, X., Qu, J., Li, L., Zhang, A., Jufeng, Z., Zheng, J., & Pan, G. (2012). Can biochar amendment be an ecological engineering technology to depress N2O emission in rice paddies?- A cross site field experiment from South China. Ecological Engineering, 42, 168–173. doi:10.1016/j.ecoleng.2012.01.016.
	205- Hu, X.-K., Su, F., Ju, X.-T., Gao, B., Oenema, O., Christie, P., … Zhang, F.-S. (2013). Greenhouse gas emissions from a wheat–maize double cropping system with different nitrogen fertilization regimes. Environmental Pollution, 176, 198–207. doi:10.1016/j.envpol.2013.01.040.
